# Supplementary material
Source: Research Square preprint supplement (doi:10.21203/rs.3.rs-8879446/v1)
Supplement: Supplementary file 1 [file 1c94f4edeef9c14678572c47.xlsx]

## Sheet: S1-Accession
Accession ID	Category	Fruit Type	Provenance	Origin	Sequencing_short	Sequencing_long	BioSample	Accession No.	Status
Eg-D72	Commercial	Dura	Elite Dura parent	Deli	MGI DNBSEQ	ONT GridION	SAMN54999685	Process	Submitted
Eg-D05	Commercial	Dura	Elite Dura parent	Deli	MGI DNBSEQ	ONT GridION	SAMN54999686	Process	Submitted
Eg-PSP540	Commercial	Pisifera	Elite Pisifera parent	AVROS	MGI DNBSEQ	ONT GridION	SAMN54999687	Process	Submitted
Eg-TAV	Commercial	Tenera	Commercial seedling	Deli x AVROS	MGI DNBSEQ	ONT GridION	SAMN54999688	JBYRRX000000000	Release upon publication
Eg-DPS54	Commercial	Tenera	Commercial seedling	Deli x AVROS	MGI DNBSEQ	ONT GridION	SAMN54999689	JBYRHL000000000	Release upon publication
Eg-DEVO	Semi	Dura	Breeding population	Evolution	MGI DNBSEQ	ONT GridION	SAMN54999690	JBYRHK000000000	Release upon publication
Eg-DDWK	Semi	Dura	Breeding population	Diwakka-wakka	MGI DNBSEQ	ONT GridION	SAMN54999691	JBYRHJ000000000	Release upon publication
Eg-DDOU	Semi	Dura	Breeding population	Dabou	MGI DNBSEQ	ONT GridION	SAMN54999692	JBYRHI000000000	Release upon publication
Eg-DDY	Semi	Dura	Breeding population	Dumpy	MGI DNBSEQ	ONT GridION	SAMN54999693	JBYRHH000000000	Release upon publication
Eg-PLM	Semi	Tenera	Breeding population	La Me	MGI DNBSEQ	ONT GridION	SAMN54999694	JBYRHG000000000	Release upon publication
Eg-TTAN	Semi	Tenera	Breeding population	Tanzania	MGI DNBSEQ	ONT GridION	SAMN54999695	JBYRHF000000000	Release upon publication
Eg-TNIG	Semi	Tenera	Breeding population	Nigeria	MGI DNBSEQ	ONT GridION	SAMN54999696	JBYRHE000000000	Release upon publication
Eg-TGHA	Semi	Tenera	Breeding population	Ghana	MGI DNBSEQ	ONT GridION	SAMN54999697	JBYRHD000000000	Release upon publication
Eg-TCOMP	Semi	Tenera	Breeding population	Compact	MGI DNBSEQ	ONT GridION	SAMN54999698	JBYRHC000000000	Release upon publication
Eg-TDY	Semi	Tenera	Breeding population	Dumpy	MGI DNBSEQ	ONT GridION	SAMN54999699	JBYRHB000000000	Release upon publication
Eg-TK	Semi	Tenera	Breeding population	Cameroon	MGI DNBSEQ	ONT GridION	SAMN54999700	JBYRHA000000000	Release upon publication
Eg-TYA	Semi	Tenera	Breeding population	Yangambi	MGI DNBSEQ	ONT GridION	SAMN54999701	JBYRGZ000000000	Release upon publication
Eg-DAGO	Wild	Dura	Angola 2010	Angola	MGI DNBSEQ	ONT GridION	SAMN54999702	JBYRGY000000000	Release upon publication
Eg-DCMR55	Wild	Dura	Cameroon 2008	Cameroon	MGI DNBSEQ	ONT GridION	SAMN54999703	JBYRGX000000000	Release upon publication
Eg-DVA	Wild	Dura	Angola 2010	Angola	MGI DNBSEQ	ONT GridION	SAMN54999704	JBYRGW000000000	Release upon publication
Eg-DVK	Wild	Dura	Cameroon 2008	Cameroon	MGI DNBSEQ	ONT GridION	SAMN54999705	JBYRGV000000000	Release upon publication
Eg-DKM	Wild	Dura	Cameroon 2008	Cameroon	MGI DNBSEQ	ONT GridION	SAMN54999706	JBYQWB000000000	Release upon publication
Eg-DKRB	Wild	Dura	Bogor Botanical Gardens	Bogor Botanical Gardens	MGI DNBSEQ	ONT GridION	SAMN54999707	JBYQWA000000000	Release upon publication
Eg-DKK	Wild	Dura	Cameroon 2008	Cameroon	MGI DNBSEQ	ONT GridION	SAMN54999708	JBYNIX000000000	Release upon publication
Eg-DIK	Wild	Dura	Wild Idolatrika collection	Idolatrika	MGI DNBSEQ	ONT GridION	SAMN54999709	JBYOIS000000000	Release upon publication
Eg-PB	Wild	Pisifera	Wild collection from Zimbabwe	Binga	MGI DNBSEQ	ONT GridION	SAMN54999710	JBYLTR000000000	Release upon publication
Eg-TA	Wild	Tenera	Angola 2010	Angola	MGI DNBSEQ	ONT GridION	SAMN54999711	JBYAWD000000000	Release upon publication
Eg-TVA	Wild	Tenera	Angola 2010	Angola	MGI DNBSEQ	ONT GridION	SAMN54999712	JBYOIR000000000	Release upon publication
Eg-DPLM	Wild	Pisifera	Wild La Me collection	La Me	MGI DNBSEQ	ONT GridION	SAMN54999713	JBYOIQ000000000	Release upon publication
Eg-DCMR29	Wild	Dura	Cameroon 2008	Cameroon	MGI DNBSEQ	ONT GridION	SAMN54999714	JBXYYX000000000	Release upon publication

## Sheet: S2-Assembly
Sample ID	Group	MGI raw (Gb)	MGI read length (bp)	MGI Q30 (%)	MGI coverage (x)	ONT raw (Gb)	ONT read N50 (kb)	ONT read mean (kb)	ONT Qscore mean	ONT coverage (x)	Assembly_size (bp)	Number_of_contigs	Contig_n50 (bp)	BUSCO_complete (%)	BUSCO_single_copy (%)	BUSCO_duplicated (%)	BUSCO_fragmented (%)	BUSCO_missing (%)	Repeat_content (%)
Eg-D72	Commercial	57.32	150	90.23	36.39	37.5	19.31	14.68	16.5	23.8	1575299205	12229	252715	98	90.8	7.2	1.2	0.8	74.4
Eg-D05	Commercial	59.22	150	90.5	38.26	38.04	19.39	15.94	16.7	24.57	1548137959	11386	274457	97.7	90.4	7.3	1.5	0.8	73.93
Eg-PSP540	Commercial	65.91	150	89.11	38.72	33.23	21.41	15.97	16.3	19.53	1702053702	17359	196083	97	89.3	7.7	2	1	75.4
Eg-TAV	Commercial	86.99	150	88.67	55.87	32.13	23.19	17.84	16.6	20.64	1557094294	10138	321282	98.6	91	7.6	0.9	0.5	74.36
Eg-DPS54	Commercial	95.74	150	87.67	58.73	30.68	23.54	13.79	15.5	18.82	1630092778	15328	203007	98.4	90.4	8	1	0.6	74.5
Eg-DEVO	Semi	59.69	150	89.75	44.51	32.6	11.18	6.49	15.3	24.31	1341108995	23879	231862	97.4	89.7	7.7	1.6	1	70.6
Eg-DDWK	Semi	66.08	150	94.91	39.67	31.72	31.5	19.13	16.5	19.04	1665835401	12268	276887	98.2	90.7	7.5	1.2	0.6	75.29
Eg-DDOU	Semi	62.24	150	90.33	45.71	30.34	15.99	8.34	15.9	22.29	1361405866	16827	234591	97.3	90.6	6.7	1.7	1	71.54
Eg-DDY	Semi	64.08	150	83.88	41.12	33.02	20.98	12.27	16.1	21.19	1558427352	8805	367752	98.2	91.2	7	1	0.8	74.75
Eg-PLM	Semi	62.71	150	91.08	41.2	39.56	23.21	11.04	16.1	25.99	1659499001	19127	163762	97.3	88.5	8.8	2	0.7	74.6
Eg-TTAN	Semi	64.93	150	90.09	44.5	31.26	10.79	7.33	14.1	21.42	1459033458	26869	186670	97.2	89.3	7.9	1.7	1.1	71.3
Eg-TNIG	Semi	64.14	150	90.24	58.02	30.49	6.21	3.98	13.5	27.58	1105501470	48238	82325	94.9	88.8	6.1	3.4	1.7	66
Eg-TGHA	Semi	65.18	150	88.91	61.1	31.43	4.9	3.19	14.3	29.47	1066736229	59953	70392	93.4	87.3	6.1	4.5	2.1	65.2
Eg-TCOMP	Semi	64.82	150	87.89	71.69	31.63	4.23	2.73	14.6	34.98	904215202	93465	51230	91.6	86	5.6	5.5	2.9	60.5
Eg-TDY	Semi	61.62	150	88.49	39.26	31.14	23.42	14.96	16.6	19.84	1569817194	13514	214828	97.5	89.3	8.2	1.6	0.9	73.98
Eg-TK	Semi	63.41	150	91.23	52.18	31.71	10.5	5.26	15	26.1	1215234535	36685	109646	95.5	88.4	7.1	3.1	1.4	67.96
Eg-TYA	Semi	60.33	150	89.95	37.62	33.85	22.17	12.5	16.3	21.11	1603797907	17734	173684	97.1	88.9	8.2	2	0.9	74.02
Eg-DAGO	Wild	59.82	150	90.57	52.74	32.41	6.28	4.3	13.4	28.57	1134188062	45392	96275	95.3	88.5	6.8	3.4	1.3	66.4
Eg-DCMR55	Wild	63.51	150	90.56	40.26	30.99	16.75	10.94	13.8	19.64	1577589226	15505	294533	97.5	89.8	7.7	1.2	1.3	74.2
Eg-DVA	Wild	65.64	150	87.11	46.65	31.49	14.58	10.08	15.7	22.39	1406881623	15230	297268	97.7	90.1	7.6	1.5	0.8	72.05
Eg-DVK	Wild	90.2	150	89.68	74.5	33.32	9.32	4.21	15.1	27.52	1210762371	34255	178724	97.1	90	7.1	2.2	0.7	68.46
Eg-DKM	Wild	66.74	150	91.54	44.88	30.71	24.41	11.29	16.6	20.65	1487128117	16128	211039	97.4	88.7	8.7	1.7	0.9	72.61
Eg-DKRB	Wild	69.97	150	87.18	40.81	32.15	25.47	16.08	16.2	18.75	1714742532	20219	158750	97.7	88.6	9.1	2	0.3	74.7
Eg-DKK	Wild	64.87	150	91.99	43.55	31.7	23.32	10.32	16	21.28	1489637563	16063	259160	97.6	90	7.6	1.7	0.7	72.92
Eg-DIK	Wild	60.61	150	89.78	46.69	32.47	14.12	6.94	15.4	25.01	1298176074	24216	159550	96.8	89.3	7.5	2.2	1	69.73
Eg-PB	Wild	87.33	150	85.74	54.35	30.91	26.17	17.58	16.5	19.24	1606799409	13214	232036	98.2	90	8.2	1.2	0.6	74.56
Eg-TA	Wild	65.43	150	87.92	47.86	33.52	11.09	7.67	15.4	24.52	1366975980	20846	224452	97.4	89.5	7.9	1.9	0.7	70.96
Eg-TVA	Wild	64.71	150	88.07	45.65	34.11	11.66	8.57	15.7	24.06	1417528404	18852	223588	97.1	89.5	7.6	2	0.9	71.97
Eg-DPLM	Wild	64.63	150	90.62	38.95	30.58	23.42	13.8	16.2	18.42	1522102000	10666	451009	98.1	90.7	7.4	1.2	0.7	73.92
Eg-DCMR29	Wild	64.95	150	90.15	42.77	30.69	12.93	8.79	13.8	20.22	1518333937	17551	245900	97.5	89.6	7.9	1.8	0.7	73.3

## Sheet: S3-Comparison
A. Spearman correlation analyses
Predictor	Outcome	Spearman_rho	p_value	N
ONT_read_N50 (kb)	contigs_n50 (Mb)	0.440093	0.0149442	30
RepeatContent (%)	contigs_n50 (Mb)	0.555008	0.00217339	28
B. Covariate analysis
Model	term	Estimate	Std_Error	t_value	p_value
contigs_n50_Mb ~ ONT_read_N50 + MGI_coverage + ONT_coverage	(Intercept)	0.176496	0.18165	0.971626	0.34019
contigs_n50_Mb ~ ONT_read_N50 + MGI_coverage + ONT_coverage	ONT_read_N50	0.00589755	0.0030901	1.90853	0.067421
contigs_n50_Mb ~ ONT_read_N50 + MGI_coverage + ONT_coverage	MGI_coverage	-0.00256927	0.00181892	-1.41253	0.169654
contigs_n50_Mb ~ ONT_read_N50 + MGI_coverage + ONT_coverage	ONT_coverage	0.00259283	0.0061955	0.418502	0.679017
C. Kruskal-Wallis
Metric	Test	H	df	p_value
contigs_n50 (Mb)	Kruskal–Wallis	1.55345	2	0.45991
BUSCO completeness (%)	Kruskal–Wallis	7.14408	2	0.0280985
D. DunnPosthoc
Metric	Comparison	Z	p_unadj	p_adj
contigs_n50 (Mb)	Commercial - Semi	1.23774	0.215814	0.647441
contigs_n50 (Mb)	Commercial - Wild	0.986308	0.323982	0.485973
contigs_n50 (Mb)	Semi - Wild	-0.349235	0.726913	0.726913
BUSCO completeness (%)	Commercial - Semi	2.14354	0.03207	0.048105
BUSCO completeness (%)	Commercial - Wild	0.412611	0.679892	0.679892
BUSCO completeness (%)	Semi - Wild	-2.30779	0.021011	0.0630329
E. Group comparsion
Group	N	contigs_n50_Mb_mean	contigs_n50_Mb_sd	contigs_n50_Mb_median	contigs_n50_Mb_IQR	BuscoC_mean	BuscoC_sd	BuscoC_median	BuscoC_IQR	RepeatContent_mean	RepeatContent_sd	RepeatContent_median	RepeatContent_IQR
Commercial	5	0.249509	0.0519635	0.252715	0.07145	99.6	0.282843	99.6	0	74.27	0.297153	74.4	0.275
Semi	12	0.20424	0.121013	0.200749	0.142349	97.6333	4.09308	99.2	1.475	70.4117	4.61735	71.4	6.53
Wild	13	0.211157	0.0581314	0.223588	0.082138	99.4769	0.305924	99.6	0.3	72.0369	2.54649	72.61	3.29

## Sheet: S3c-GroupSummaries
Group	N	contigs_n50_Mb_mean	contigs_n50_Mb_sd	contigs_n50_Mb_median	contigs_n50_Mb_IQR	BuscoC_mean	BuscoC_sd	BuscoC_median	BuscoC_IQR	RepeatContent_mean	RepeatContent_sd	RepeatContent_median	RepeatContent_IQR
Commercial	5	0.249509	0.0519635	0.252715	0.07145	99.6	0.282843	99.6	0	74.27	0.297153	74.4	0.275
Semi	12	0.20424	0.121013	0.200749	0.142349	97.6333	4.09308	99.2	1.475	70.4117	4.61735	71.4	6.53
Wild	13	0.211157	0.0581314	0.223588	0.082138	99.4769	0.305924	99.6	0.3	72.0369	2.54649	72.61	3.29

## Sheet: S4-GraphStats
Metric	Value
Number of genomes	30
Total graph length (bp)	2627484484
Number of nodes	268323847
Number of edges	262611313
Mean node length (bp)	9.79
Median node length (bp)	1
Min node length (bp)	1
Max node length (bp)	21868369

## Sheet: S5-SV_per_accessions
		InDels		Duplications
Accession ID	Category	Insertion	Deletion	Tandem	Proximal	Dispersed	Interchromosomal
Eg-D72	Commercial	18653	22125	3875	525	462	1295
Eg-D05	Commercial	18551	22763	3929	513	463	1298
Eg-PSP540	Commercial	16549	21034	3647	483	459	1281
Eg-TAV	Commercial	16868	22548	3851	516	467	1267
Eg-DPS54	Commercial	14796	18958	3681	492	442	1240
Eg-DEVO	Semi	16243	20842	3797	495	443	1233
Eg-DDWK	Semi	19629	21699	3947	522	468	1300
Eg-DDOU	Semi	18963	21282	3827	489	458	1281
Eg-DDY	Semi	20589	22769	4022	531	469	1305
Eg-PLM	Semi	25777	28136	4181	536	478	1340
Eg-TTAN	Semi	17234	22406	3708	467	445	1265
Eg-TNIG	Semi	13376	19308	3464	380	409	1135
Eg-TGHA	Semi	13482	19779	3383	367	416	1123
Eg-TCOMP	Semi	12518	19207	3210	317	404	1087
Eg-TDY	Semi	18197	21374	3934	514	471	1296
Eg-TK	Semi	11416	16333	3316	399	409	1099
Eg-TYA	Semi	17141	20750	3736	497	450	1270
Eg-DAGO	Wild	13572	19594	3492	401	439	1152
Eg-DCMR55	Wild	19214	23948	3967	506	466	1284
Eg-DVA	Wild	18864	21708	3905	499	472	1306
Eg-DVK	Wild	16205	20177	3694	446	442	1225
Eg-DKM	Wild	18634	21909	3832	484	452	1277
Eg-DKRB	Wild	21266	28385	3948	485	468	1320
Eg-DKK	Wild	18693	21402	3861	485	455	1266
Eg-DIK	Wild	16682	21922	3831	463	451	1243
Eg-PB	Wild	15342	21107	3868	507	462	1254
Eg-TA	Wild	16916	21059	3857	465	443	1249
Eg-TVA	Wild	17911	21877	3877	477	457	1270
Eg-DPLM	Wild	21100	24959	3942	508	469	1287
Eg-DCMR29	Wild	18258	23469	3940	483	464	1291

## Sheet: S6-SV_per_chromosome
Chromosome	Chromosome_length_bp	Chromosome_length_Mb	Insertion_count	Deletion_count	Tandem_duplication_count	Proximal_duplication_count	Dispersed_duplication_count	Interchromosomal_duplication_count	Duplication_count	Total_SV50_count	Insertion_per_Mb	Deletion_per_Mb	Tandem_duplication_per_Mb	Proximal_duplication_per_Mb	Dispersed_duplication_per_Mb	Interchromosomal_duplication_per_Mb	Duplication_per_Mb	Total_SV50_per_Mb
Chr_01	186201000	186.201	15586	15687	331	398	869	3432	5030	36303	83.705	84.248	1.778	2.137	4.667	18.432	27.014	194.967
Chr_02	128314000	128.314	10345	10197	250	352	415	2315	3332	23874	80.623	79.469	1.948	2.743	3.234	18.042	25.968	186.059
Chr_03	129342000	129.342	10027	10035	213	336	440	2266	3255	23317	77.523	77.585	1.647	2.598	3.402	17.519	25.166	180.274
Chr_04	142664000	142.664	10657	10222	231	388	404	2605	3628	24507	74.7	71.651	1.619	2.72	2.832	18.26	25.43	171.781
Chr_05	133516000	133.516	10395	10942	236	297	482	2624	3639	24976	77.856	81.953	1.768	2.224	3.61	19.653	27.255	187.064
Chr_06	133791000	133.791	10597	10995	219	271	552	2683	3725	25317	79.206	82.18	1.637	2.026	4.126	20.054	27.842	189.228
Chr_07	105248000	105.248	8741	8474	189	261	326	2338	3114	20329	83.051	80.515	1.796	2.48	3.097	22.214	29.587	193.153
Chr_08	139666000	139.666	9501	9959	182	276	440	2368	3266	22726	68.027	71.306	1.303	1.976	3.15	16.955	23.384	162.717
Chr_09	98887000	98.887	7214	7486	143	243	227	1995	2608	17308	72.952	75.703	1.446	2.457	2.296	20.175	26.374	175.028
Chr_10	87768000	87.768	6006	6313	162	158	190	1606	2116	14435	68.43	71.928	1.846	1.8	2.165	18.298	24.109	164.468
Chr_11	124043000	124.043	8182	8185	182	262	306	2027	2777	19144	65.961	65.985	1.467	2.112	2.467	16.341	22.387	154.334
Chr_12	95107000	95.107	6458	6614	139	145	251	1786	2321	15393	67.902	69.543	1.462	1.525	2.639	18.779	24.404	161.849
Chr_13	80302000	80.302	6644	6622	138	163	251	1579	2131	15397	82.738	82.464	1.719	2.03	3.126	19.663	26.537	191.739
Chr_14	69732000	69.732	5518	5655	126	132	170	1539	1967	13140	79.132	81.096	1.807	1.893	2.438	22.07	28.208	188.436
Chr_15	75253000	75.253	5593	5979	143	132	137	1535	1947	13519	74.323	79.452	1.9	1.754	1.821	20.398	25.873	179.647
Chr_16	47883000	47.883	3898	3840	83	87	132	1019	1321	9059	81.407	80.195	1.733	1.817	2.757	21.281	27.588	189.19

## Sheet: S7-Validation
A. Gene presence-absence category counts
Pan_genome_category	Definition	Gene_count	Percentage_of_filtered_genes	Notes
Core	Present in ≥95% of accessions (≥29/30)	25531	75.724	Conserved across nearly all accessions
Shell	Present in 2–28 accessions	7552	22.399	Variable genes shared by at least two accessions
Unique	Present in exactly one accession	633	1.877	Includes 420 genotype-supported single-accession genes plus 213 EG11-specific/reference-unique genes
Total	All genes in filtered PAV matrix	33716	100	Core + Shell + Unique after assigning EG11-specific genes to Unique
B. Assembly-based validation of SV-derived PAV inference
Validation_scope	TP	FP	FN	TN	Accuracy	Sensitivity_presence_recall	Specificity_absence	Precision_presence	False_absence_rate	False_presence_rate
all_genes	3877	695	3309	1119	0.5551	0.5395	0.6169	0.848	0.4605	0.3831
core	2503	491	5	1	0.8347	0.998	0.002	0.836	0.002	0.998
shell	1298	180	1088	434	0.5773	0.544	0.7068	0.8782	0.456	0.2932
unique_original_validation_scope	76	24	2216	684	0.2533	0.0332	0.9661	0.76	0.9668	0.0339

## Sheet: S8-CNV
Duplication class	Group	Genes evaluated	Genes with CNV-gain	Fraction gain
Tandem	Wild	3910	3877	0.992
Tandem	Semi	3910	3843	0.983
Tandem	Commercial	3910	3733	0.955
Proximal	Wild	579	545	0.941
Proximal	Semi	579	554	0.957
Proximal	Commercial	579	505	0.872
Dispersed	Wild	252	217	0.861
Dispersed	Semi	252	235	0.933
Dispersed	Commercial	252	193	0.766
Interchromosomal	Wild	1721	1488	0.865
Interchromosomal	Semi	1721	1557	0.905
Interchromosomal	Commercial	1721	1336	0.776
Duplication class	Test	χ²	df	p-value
Tandem	Chi-square	125.68	2	5.1e-28
Proximal	Chi-square	33.24	2	6.1e-08
Dispersed	Chi-square	28.13	2	7.8e-07
Interchromosomal	Chi-square	115.6	2	7.9e-26
Accession_ID	Germplasm_category	Unique_CNV_gain_genes	Tandem_gain_gene_class_pairs	Proximal_gain_gene_class_pairs	Dispersed_gain_gene_class_pairs	Interchromosomal_gain_gene_class_pairs
Eg-DAGO	Wild	4113	3492	401	439	1152
Eg-DCMR29	Wild	4708	3940	483	464	1291
Eg-DCMR55	Wild	4759	3967	506	466	1284
Eg-DIK	Wild	4556	3831	463	451	1243
Eg-DKK	Wild	4619	3861	485	455	1266
Eg-DKM	Wild	4599	3832	484	452	1277
Eg-DKRB	Wild	4744	3948	485	468	1320
Eg-DPLM	Wild	4725	3942	508	469	1287
Eg-DVA	Wild	4696	3905	499	472	1306
Eg-DVK	Wild	4407	3694	446	442	1225
Eg-PB	Wild	4620	3868	507	462	1254
Eg-TA	Wild	4583	3857	465	443	1249
Eg-TVA	Wild	4623	3877	477	457	1270
Eg-DDOU	Semi-domesticated	4597	3827	489	458	1281
Eg-DDWK	Semi-domesticated	4759	3947	522	468	1300
Eg-DDY	Semi-domesticated	4834	4022	531	469	1305
Eg-DEVO	Semi-domesticated	4543	3797	495	443	1233
Eg-PLM	Semi-domesticated	5039	4181	536	478	1340
Eg-TCOMP	Semi-domesticated	3773	3210	317	404	1087
Eg-TDY	Semi-domesticated	4727	3934	514	471	1296
Eg-TGHA	Semi-domesticated	3977	3383	367	416	1123
Eg-TK	Semi-domesticated	3904	3316	399	409	1099
Eg-TNIG	Semi-domesticated	4067	3464	380	409	1135
Eg-TTAN	Semi-domesticated	4453	3708	467	445	1265
Eg-TYA	Semi-domesticated	4511	3736	497	450	1270
Eg-D05	Commercial	4738	3929	513	463	1298
Eg-D72	Commercial	4681	3875	525	462	1295
Eg-DPS54	Commercial	4424	3681	492	442	1240
Eg-PSP540	Commercial	4415	3647	483	459	1281
Eg-TAV	Commercial	4621	3851	516	467	1267

## Sheet: S9A-GO_enrichment
Annotation_type	Pan_genome_category	Term_ID	Term_description	Observed_count	Expected_count	Background_count	Category_total	Genome_total	Enrichment_ratio	log2_enrichment_ratio	p_value	FDR	Odds_ratio	Direction	Significance_label
GO	Core	GO:0140110	GO:0140110	1128	995.227	1363	9907	13568	1.13341	0.180669	3.84506e-19	8.2484e-15		enriched	significantly_enriched
GO	Core	GO:0003700	GO:0003700	1056	928.781	1272	9907	13568	1.13697	0.185199	8.70728e-19	8.2484e-15		enriched	significantly_enriched
GO	Core	GO:0005737	GO:0005737	5197	5401.1	7397	9907	13568	0.962212	-0.055573	1.08568e-15	6.17079e-12		depleted	significantly_depleted
GO	Core	GO:0044444	GO:0044444	4425	4614.7	6320	9907	13568	0.958892	-0.060559	1.1495e-13	4.66682e-10		depleted	significantly_depleted
GO	Core	GO:0044446	GO:0044446	3003	3170.42	4342	9907	13568	0.947195	-0.078267	3.14354e-12	9.92627e-09		depleted	significantly_depleted
GO	Core	GO:0044422	GO:0044422	3021	3185.75	4363	9907	13568	0.948286	-0.076606	7.10179e-12	2.01826e-08		depleted	significantly_depleted
GO	Core	GO:1903506	GO:1903506	1458	1345.71	1843	9907	13568	1.08344	0.115623	5.53405e-11	1.02065e-07		enriched	significantly_enriched
GO	Core	GO:2001141	GO:2001141	1458	1345.71	1843	9907	13568	1.08344	0.115623	5.53405e-11	1.02065e-07		enriched	significantly_enriched
GO	Core	GO:0006355	GO:0006355	1433	1324.54	1814	9907	13568	1.08189	0.113552	1.80531e-10	2.85028e-07		enriched	significantly_enriched
GO	Core	GO:0009889	GO:0009889	1679	1563.3	2141	9907	13568	1.07401	0.103005	2.38383e-10	3.56559e-07		enriched	significantly_enriched
GO	Core	GO:0051252	GO:0051252	1525	1414.35	1937	9907	13568	1.07824	0.108673	2.56984e-10	3.65161e-07		enriched	significantly_enriched
GO	Core	GO:0010556	GO:0010556	1597	1484.44	2033	9907	13568	1.07582	0.105442	2.98844e-10	4.04421e-07		enriched	significantly_enriched
GO	Core	GO:0031326	GO:0031326	1657	1542.86	2113	9907	13568	1.07398	0.102969	3.29166e-10	4.25207e-07		enriched	significantly_enriched
GO	Core	GO:2000112	GO:2000112	1560	1453.05	1990	9907	13568	1.07361	0.102466	1.5132e-09	1.59273e-06		enriched	significantly_enriched
GO	Core	GO:0043565	GO:0043565	547	483.375	662	9907	13568	1.13163	0.178398	1.7252e-09	1.69064e-06		enriched	significantly_enriched
GO	Core	GO:0019219	GO:0019219	1591	1484.44	2033	9907	13568	1.07178	0.100012	2.42206e-09	2.29442e-06		enriched	significantly_enriched
GO	Core	GO:0012505	GO:0012505	1207	1305.55	1788	9907	13568	0.924514	-0.113233	1.70601e-08	1.46918e-05		depleted	significantly_depleted
GO	Core	GO:0005622	GO:0005622	7236	7359.42	10079	9907	13568	0.983229	-0.0244	1.9936e-08	1.66635e-05		depleted	significantly_depleted
GO	Core	GO:0044424	GO:0044424	7207	7328.76	10037	9907	13568	0.983387	-0.024169	3.44501e-08	2.71955e-05		depleted	significantly_depleted
GO	Core	GO:0006996	GO:0006996	1063	1154.4	1581	9907	13568	0.920821	-0.119008	3.55478e-08	2.73036e-05		depleted	significantly_depleted
GO	Core	GO:0001067	GO:0001067	352	306.673	420	9907	13568	1.1478	0.198874	7.42134e-08	5.27268e-05		enriched	significantly_enriched
GO	Core	GO:0044212	GO:0044212	352	306.673	420	9907	13568	1.1478	0.198874	7.42134e-08	5.27268e-05		enriched	significantly_enriched
GO	Core	GO:0080090	GO:0080090	1883	1781.62	2440	9907	13568	1.0569	0.07984	1.31728e-07	9.1307e-05		enriched	significantly_enriched
GO	Core	GO:0010468	GO:0010468	1741	1643.62	2251	9907	13568	1.05925	0.083038	1.62086e-07	0.000109674		enriched	significantly_enriched
GO	Core	GO:0051171	GO:0051171	1848	1748.77	2395	9907	13568	1.05675	0.079627	1.93209e-07	0.000127693		enriched	significantly_enriched
GO	Core	GO:0016043	GO:0016043	1656	1756.8	2406	9907	13568	0.942624	-0.085246	2.55347e-07	0.000155935		depleted	significantly_depleted
GO	Core	GO:0016887	GO:0016887	270	317.626	435	9907	13568	0.850057	-0.234368	2.72979e-07	0.000155935		depleted	significantly_depleted
GO	Core	GO:0003676	GO:0003676	1735	1641.43	2248	9907	13568	1.057	0.079982	4.61278e-07	0.00024276		enriched	significantly_enriched
GO	Core	GO:0005623	GO:0005623	8257	8348.08	11433	9907	13568	0.98909	-0.015826	5.32193e-07	0.00026534		depleted	significantly_depleted
GO	Core	GO:0044464	GO:0044464	8257	8348.08	11433	9907	13568	0.98909	-0.015826	5.32193e-07	0.00026534		depleted	significantly_depleted
GO	Core	GO:0031974	GO:0031974	916	993.037	1360	9907	13568	0.922423	-0.116499	6.26048e-07	0.000286962		depleted	significantly_depleted
GO	Core	GO:0043233	GO:0043233	916	993.037	1360	9907	13568	0.922423	-0.116499	6.26048e-07	0.000286962		depleted	significantly_depleted
GO	Core	GO:0070013	GO:0070013	916	993.037	1360	9907	13568	0.922423	-0.116499	6.26048e-07	0.000286962		depleted	significantly_depleted
GO	Core	GO:0051234	GO:0051234	1269	1354.47	1855	9907	13568	0.936896	-0.094039	1.17075e-06	0.000519866		depleted	significantly_depleted
GO	Core	GO:0044428	GO:0044428	991	1068.24	1463	9907	13568	0.92769	-0.108285	1.22694e-06	0.000520422		depleted	significantly_depleted
GO	Core	GO:0016192	GO:0016192	241	283.308	388	9907	13568	0.850666	-0.233336	1.31293e-06	0.000548706		depleted	significantly_depleted
GO	Core	GO:0031323	GO:0031323	1965	1871.44	2563	9907	13568	1.05	0.070384	1.65754e-06	0.00066346		enriched	significantly_enriched
GO	Core	GO:0022625	GO:0022625	102	81.7795	112	9907	13568	1.24726	0.318758	1.68476e-06	0.00066499		enriched	significantly_enriched
GO	Core	GO:0017111	GO:0017111	329	376.04	515	9907	13568	0.874908	-0.192797	2.28972e-06	0.000845086		depleted	significantly_depleted
GO	Core	GO:0006810	GO:0006810	1241	1323.08	1812	9907	13568	0.937966	-0.092392	2.34083e-06	0.000847343		depleted	significantly_depleted
GO	Core	GO:0071840	GO:0071840	1865	1960.52	2685	9907	13568	0.95128	-0.072059	2.4317e-06	0.000853166		depleted	significantly_depleted
GO	Core	GO:0010200	GO:0010200	128	105.145	144	9907	13568	1.21737	0.283763	2.404e-06	0.000853166		enriched	significantly_enriched
GO	Core	GO:0003677	GO:0003677	875	811.223	1111	9907	13568	1.07862	0.109184	2.54667e-06	0.000882606		enriched	significantly_enriched
GO	Core	GO:0042623	GO:0042623	226	265.783	364	9907	13568	0.850317	-0.233928	2.63823e-06	0.000903324		depleted	significantly_depleted
GO	Core	GO:0051179	GO:0051179	1379	1463.27	2004	9907	13568	0.942411	-0.085572	3.19649e-06	0.00108144		depleted	significantly_depleted
GO	Core	GO:0031981	GO:0031981	804	871.097	1193	9907	13568	0.922974	-0.115639	3.86335e-06	0.00129168		depleted	significantly_depleted
GO	Core	GO:0031982	GO:0031982	393	441.755	605	9907	13568	0.889633	-0.168718	5.09417e-06	0.00168339		depleted	significantly_depleted
GO	Core	GO:0015934	GO:0015934	110	89.8114	123	9907	13568	1.22479	0.292533	6.23832e-06	0.00201462		enriched	significantly_enriched
GO	Core	GO:0097708	GO:0097708	374	420.58	576	9907	13568	0.889248	-0.169343	8.01969e-06	0.0025608		depleted	significantly_depleted
GO	Core	GO:0060255	GO:0060255	1985	1897.72	2599	9907	13568	1.04599	0.06487	8.22446e-06	0.00259701		enriched	significantly_enriched
GO	Core	GO:0005575	GO:0005575	8455	8531.35	11684	9907	13568	0.99105	-0.01297	8.52568e-06	0.00266254		depleted	significantly_depleted
GO	Core	GO:0016817	GO:0016817	360	405.247	555	9907	13568	0.888348	-0.170803	1.0068e-05	0.00304385		depleted	significantly_depleted
GO	Core	GO:0031410	GO:0031410	372	417.659	572	9907	13568	0.890678	-0.167025	1.10201e-05	0.00329663		depleted	significantly_depleted
GO	Core	GO:0016818	GO:0016818	358	402.326	551	9907	13568	0.889826	-0.168405	1.38553e-05	0.00405932		depleted	significantly_depleted
GO	Core	GO:0016462	GO:0016462	357	400.865	549	9907	13568	0.890573	-0.167194	1.62361e-05	0.00461413		depleted	significantly_depleted
GO	Core	GO:0003824	GO:0003824	3970	4075.1	5581	9907	13568	0.974209	-0.037697	2.03199e-05	0.00571754		depleted	significantly_depleted
GO	Core	GO:0009987	GO:0009987	6044	6146.6	8418	9907	13568	0.983307	-0.024286	2.23291e-05	0.00605399		depleted	significantly_depleted
GO	Core	GO:0022626	GO:0022626	203	175.972	241	9907	13568	1.15359	0.206134	2.22485e-05	0.00605399		enriched	significantly_enriched
GO	Core	GO:0005783	GO:0005783	550	601.663	824	9907	13568	0.914133	-0.129525	2.39714e-05	0.00626855		depleted	significantly_depleted
GO	Core	GO:0003735	GO:0003735	180	154.797	212	9907	13568	1.16281	0.217621	2.40428e-05	0.00626855		enriched	significantly_enriched
GO	Core	GO:0000976	GO:0000976	127	106.605	146	9907	13568	1.19131	0.252548	3.38758e-05	0.00859567		enriched	significantly_enriched
GO	Core	GO:0032991	GO:0032991	1536	1612.95	2209	9907	13568	0.95229	-0.070527	3.63155e-05	0.00913319		depleted	significantly_depleted
GO	Core	GO:0000981	GO:0000981	165	141.654	194	9907	13568	1.16481	0.220097	4.25993e-05	0.0104365		enriched	significantly_enriched
GO	Core	GO:0005840	GO:0005840	227	199.338	273	9907	13568	1.13877	0.187479	4.6525e-05	0.011205		enriched	significantly_enriched
GO	Core	GO:0044391	GO:0044391	168	144.574	198	9907	13568	1.16203	0.216649	4.83661e-05	0.0115506		enriched	significantly_enriched
GO	Core	GO:0019222	GO:0019222	2163	2081.73	2851	9907	13568	1.03904	0.055254	5.53713e-05	0.0131133		enriched	significantly_enriched
GO	Core	GO:0042175	GO:0042175	202	233.656	320	9907	13568	0.86452	-0.210029	5.73357e-05	0.0133559		depleted	significantly_depleted
GO	Core	GO:0005789	GO:0005789	198	229.275	314	9907	13568	0.863593	-0.211576	6.03233e-05	0.0139376		depleted	significantly_depleted
GO	Core	GO:1901363	GO:1901363	1975	1897.72	2599	9907	13568	1.04072	0.057584	7.04464e-05	0.015889		enriched	significantly_enriched
GO	Core	GO:0008152	GO:0008152	4760	4858.58	6654	9907	13568	0.979711	-0.029572	7.39758e-05	0.0164244		depleted	significantly_depleted
GO	Core	GO:0098827	GO:0098827	204	235.116	322	9907	13568	0.867657	-0.204804	7.79679e-05	0.0171765		depleted	significantly_depleted
GO	Core	GO:1990837	GO:1990837	157	135.082	185	9907	13568	1.16226	0.216927	8.31556e-05	0.017903		enriched	significantly_enriched
GO	Core	GO:0097159	GO:0097159	1980	1903.56	2607	9907	13568	1.04015	0.056798	8.49953e-05	0.0181615		enriched	significantly_enriched
GO	Core	GO:0044238	GO:0044238	3876	3970.69	5438	9907	13568	0.976154	-0.03482	0.000103526	0.0213197		depleted	significantly_depleted
GO	Core	GO:0044445	GO:0044445	231	204.449	280	9907	13568	1.12987	0.176154	0.000113018	0.0229418		enriched	significantly_enriched
GO	Core	GO:0045184	GO:0045184	289	324.197	444	9907	13568	0.891433	-0.165802	0.000114905	0.0231594		depleted	significantly_depleted
GO	Core	GO:0008026	GO:0008026	68	86.8907	119	9907	13568	0.782592	-0.353667	0.000127559	0.0251743		depleted	significantly_depleted
GO	Core	GO:0070035	GO:0070035	68	86.8907	119	9907	13568	0.782592	-0.353667	0.000127559	0.0251743		depleted	significantly_depleted
GO	Core	GO:0008104	GO:0008104	357	395.024	541	9907	13568	0.903742	-0.146017	0.000140709	0.0268376		depleted	significantly_depleted
GO	Core	GO:0051276	GO:0051276	339	376.04	515	9907	13568	0.901501	-0.149599	0.000147623	0.0276006		depleted	significantly_depleted
GO	Core	GO:0015833	GO:0015833	291	325.658	446	9907	13568	0.893577	-0.162337	0.000147103	0.0276006		depleted	significantly_depleted
GO	Core	GO:0005768	GO:0005768	298	332.959	456	9907	13568	0.895004	-0.160034	0.000150465	0.0277853		depleted	significantly_depleted
GO	Core	GO:0042641	GO:0042641	1	6.5716	9	9907	13568	0.152171	-2.71624	0.000191252	0.0344		depleted	significantly_depleted
GO	Core	GO:0000096	GO:0000096	20	31.3975	43	9907	13568	0.636994	-0.650649	0.000203675	0.0361765		depleted	significantly_depleted
GO	Core	GO:0004386	GO:0004386	72	90.5416	124	9907	13568	0.795215	-0.330583	0.000213519	0.0370872		depleted	significantly_depleted
GO	Core	GO:0010027	GO:0010027	25	37.2389	51	9907	13568	0.671342	-0.574881	0.000224155	0.0381453		depleted	significantly_depleted
GO	Core	GO:0042886	GO:0042886	304	338.07	463	9907	13568	0.899221	-0.153253	0.000233677	0.0395289		depleted	significantly_depleted
GO	Core	GO:0009668	GO:0009668	27	39.4294	54	9907	13568	0.684768	-0.546312	0.000258224	0.0431674		depleted	significantly_depleted
GO	Core	GO:1902494	GO:1902494	532	574.647	787	9907	13568	0.925786	-0.111249	0.000300428	0.0493518		depleted	significantly_depleted
GO	Core	GO:0071704	GO:0071704	4239	4327.01	5926	9907	13568	0.97966	-0.029647	0.00032599	0.0523375		depleted	not_significant
GO	Core	GO:0000097	GO:0000097	12	21.175	29	9907	13568	0.566705	-0.819331	0.000327812	0.0523375		depleted	not_significant
GO	Core	GO:0007399	GO:0007399	49	64.2553	88	9907	13568	0.762583	-0.391034	0.000335926	0.0533333		depleted	not_significant
GO	Core	GO:0005654	GO:0005654	424	462.2	633	9907	13568	0.917352	-0.124453	0.000342442	0.0540658		depleted	not_significant
GO	Core	GO:0019752	GO:0019752	479	519.154	711	9907	13568	0.922656	-0.116136	0.00035711	0.0560702		depleted	not_significant
GO	Core	GO:0044432	GO:0044432	235	264.323	362	9907	13568	0.889064	-0.169641	0.000365263	0.0567236		depleted	not_significant
GO	Core	GO:0015031	GO:0015031	283	314.705	431	9907	13568	0.899255	-0.153198	0.000379755	0.0580229		depleted	not_significant
GO	Core	GO:0044451	GO:0044451	258	288.419	395	9907	13568	0.894533	-0.160794	0.00038344	0.0582726		depleted	not_significant
GO	Core	GO:0009416	GO:0009416	559	520.614	713	9907	13568	1.07373	0.102634	0.000404649	0.0594992		enriched	not_significant
GO	Core	GO:0007623	GO:0007623	93	78.1286	107	9907	13568	1.19034	0.25138	0.00040826	0.0594992		enriched	not_significant
GO	Core	GO:0048511	GO:0048511	93	78.1286	107	9907	13568	1.19034	0.25138	0.00040826	0.0594992		enriched	not_significant
GO	Core	GO:0051291	GO:0051291	32	24.0957	33	9907	13568	1.32804	0.409294	0.000405985	0.0594992		enriched	not_significant
GO	Core	GO:0033036	GO:0033036	450	488.486	669	9907	13568	0.921213	-0.118393	0.000425627	0.0614005		depleted	not_significant
GO	Core	GO:0001134	GO:0001134	92	77.3984	106	9907	13568	1.18865	0.249329	0.000489741	0.0689007		enriched	not_significant
GO	Core	GO:0001135	GO:0001135	92	77.3984	106	9907	13568	1.18865	0.249329	0.000489741	0.0689007		enriched	not_significant
GO	Core	GO:0009746	GO:0009746	43	56.9536	78	9907	13568	0.755001	-0.40545	0.000500581	0.0697354		depleted	not_significant
GO	Core	GO:0034284	GO:0034284	43	56.9536	78	9907	13568	0.755001	-0.40545	0.000500581	0.0697354		depleted	not_significant
GO	Core	GO:1901700	GO:1901700	1243	1187.99	1627	9907	13568	1.0463	0.0653	0.000517401	0.0713788		enriched	not_significant
GO	Core	GO:0006913	GO:0006913	72	89.0812	122	9907	13568	0.808251	-0.307124	0.00053348	0.0728893		depleted	not_significant
GO	Core	GO:0051169	GO:0051169	72	89.0812	122	9907	13568	0.808251	-0.307124	0.00053348	0.0728893		depleted	not_significant
GO	Core	GO:0099023	GO:0099023	24	35.0483	48	9907	13568	0.684768	-0.546312	0.000560339	0.0751145		depleted	not_significant
GO	Core	GO:0031984	GO:0031984	681	725.793	994	9907	13568	0.938284	-0.091903	0.000588628	0.0752289		depleted	not_significant
GO	Core	GO:0051641	GO:0051641	489	527.916	723	9907	13568	0.926284	-0.110473	0.000566091	0.0752289		depleted	not_significant
GO	Core	GO:0003724	GO:0003724	53	67.9062	93	9907	13568	0.780489	-0.35755	0.000597712	0.0752289		depleted	not_significant
GO	Core	GO:0000146	GO:0000146	1	5.8414	8	9907	13568	0.171192	-2.54631	0.00063399	0.0783363		depleted	not_significant
GO	Core	GO:0033275	GO:0033275	1	5.8414	8	9907	13568	0.171192	-2.54631	0.00063399	0.0783363		depleted	not_significant
GO	Core	GO:0043173	GO:0043173	1	5.8414	8	9907	13568	0.171192	-2.54631	0.00063399	0.0783363		depleted	not_significant
GO	Core	GO:0044427	GO:0044427	213	239.497	328	9907	13568	0.889364	-0.169154	0.00069306	0.0829315		depleted	not_significant
GO	Core	GO:0016627	GO:0016627	35	47.4613	65	9907	13568	0.737443	-0.439397	0.000694524	0.0829315		depleted	not_significant
GO	Core	GO:0044270	GO:0044270	149	171.591	235	9907	13568	0.868345	-0.203661	0.000720214	0.0842698		depleted	not_significant
GO	Core	GO:0051290	GO:0051290	23	16.794	23	9907	13568	1.36954	0.453688	0.000717479	0.0842698		enriched	not_significant
GO	Core	GO:0007163	GO:0007163	12	20.4449	28	9907	13568	0.586944	-0.768705	0.000726283	0.0842698		depleted	not_significant
GO	Core	GO:0030898	GO:0030898	2	7.3017	10	9907	13568	0.273907	-1.86824	0.00072816	0.0842698		depleted	not_significant
GO	Core	GO:0051010	GO:0051010	2	7.3017	10	9907	13568	0.273907	-1.86824	0.00072816	0.0842698		depleted	not_significant
GO	Core	GO:0006518	GO:0006518	276	250.45	343	9907	13568	1.10202	0.140148	0.000743946	0.0852508		enriched	not_significant
GO	Core	GO:0009415	GO:0009415	318	290.609	398	9907	13568	1.09425	0.129946	0.000777074	0.0883346		enriched	not_significant
GO	Core	GO:0005515	GO:0005515	1314	1371.27	1878	9907	13568	0.958238	-0.061544	0.000808407	0.0915303		depleted	not_significant
GO	Core	GO:0070727	GO:0070727	339	370.928	508	9907	13568	0.913923	-0.129855	0.000836143	0.0941242		depleted	not_significant
GO	Core	GO:0009414	GO:0009414	314	286.958	393	9907	13568	1.09424	0.129923	0.00083794	0.0941242		enriched	not_significant
GO	Core	GO:0005975	GO:0005975	316	346.833	475	9907	13568	0.911102	-0.134315	0.000870234	0.096985		depleted	not_significant
GO	Core	GO:0004004	GO:0004004	53	67.176	92	9907	13568	0.788972	-0.341954	0.000975927	0.106264		depleted	not_significant
GO	Core	GO:0008186	GO:0008186	53	67.176	92	9907	13568	0.788972	-0.341954	0.000975927	0.106264		depleted	not_significant
GO	Core	GO:0030170	GO:0030170	7	13.8733	19	9907	13568	0.504566	-0.986885	0.00101708	0.108256		depleted	not_significant
GO	Core	GO:0070279	GO:0070279	7	13.8733	19	9907	13568	0.504566	-0.986885	0.00101708	0.108256		depleted	not_significant
GO	Core	GO:0016236	GO:0016236	31	42.3501	58	9907	13568	0.731994	-0.450097	0.00107469	0.112699		depleted	not_significant
GO	Core	GO:0001101	GO:0001101	945	899.574	1232	9907	13568	1.0505	0.071072	0.00110106	0.114201		enriched	not_significant
GO	Core	GO:0034655	GO:0034655	124	143.844	197	9907	13568	0.862043	-0.214168	0.00117997	0.120192		depleted	not_significant
GO	Core	GO:0008047	GO:0008047	54	67.9062	93	9907	13568	0.795215	-0.330583	0.00124908	0.125433		depleted	not_significant
GO	Core	GO:0006401	GO:0006401	68	83.2398	114	9907	13568	0.816917	-0.291739	0.0012867	0.128305		depleted	not_significant
GO	Core	GO:0032196	GO:0032196	62	51.1122	70	9907	13568	1.21302	0.278601	0.00130506	0.128318		enriched	not_significant
GO	Core	GO:0032197	GO:0032197	62	51.1122	70	9907	13568	1.21302	0.278601	0.00130506	0.128318		enriched	not_significant
GO	Core	GO:0046700	GO:0046700	151	172.321	236	9907	13568	0.876271	-0.19055	0.00133931	0.130797		depleted	not_significant
GO	Core	GO:0044237	GO:0044237	4265	4342.34	5947	9907	13568	0.982188	-0.025928	0.00138209	0.133003		depleted	not_significant
GO	Core	GO:0009725	GO:0009725	1172	1123.01	1538	9907	13568	1.04363	0.061605	0.00140133	0.133003		enriched	not_significant
GO	Core	GO:0140098	GO:0140098	237	262.863	360	9907	13568	0.901612	-0.149422	0.00139831	0.133003		depleted	not_significant
GO	Core	GO:0043414	GO:0043414	108	126.32	173	9907	13568	0.854971	-0.226053	0.00142575	0.133003		depleted	not_significant
GO	Core	GO:0009267	GO:0009267	93	110.256	151	9907	13568	0.843489	-0.245558	0.00137503	0.133003		depleted	not_significant
GO	Core	GO:0010685	GO:0010685	0	3.6509	5	9907	13568	0		0.00142742	0.133003		depleted	not_significant
GO	Core	GO:0010686	GO:0010686	0	3.6509	5	9907	13568	0		0.00142742	0.133003		depleted	not_significant
GO	Core	GO:0016871	GO:0016871	0	3.6509	5	9907	13568	0		0.00142742	0.133003		depleted	not_significant
GO	Core	GO:0019742	GO:0019742	0	3.6509	5	9907	13568	0		0.00142742	0.133003		depleted	not_significant
GO	Core	GO:0019745	GO:0019745	0	3.6509	5	9907	13568	0		0.00142742	0.133003		depleted	not_significant
GO	Core	GO:0031559	GO:0031559	0	3.6509	5	9907	13568	0		0.00142742	0.133003		depleted	not_significant
GO	Core	GO:0043085	GO:0043085	134	154.067	211	9907	13568	0.869753	-0.201322	0.00145106	0.134764		depleted	not_significant
GO	Core	GO:0009314	GO:0009314	597	561.504	769	9907	13568	1.06322	0.088435	0.00146472	0.135589		enriched	not_significant
GO	Core	GO:0002253	GO:0002253	32	43.0803	59	9907	13568	0.7428	-0.428955	0.00147799	0.136373		depleted	not_significant
GO	Core	GO:0048193	GO:0048193	81	97.1131	133	9907	13568	0.834079	-0.261745	0.00150507	0.137131		depleted	not_significant
GO	Core	GO:0070628	GO:0070628	5	10.9526	15	9907	13568	0.456512	-1.13128	0.00150889	0.137131		depleted	not_significant
GO	Core	GO:0007010	GO:0007010	179	201.528	276	9907	13568	0.888214	-0.171021	0.00159697	0.141262		depleted	not_significant
GO	Core	GO:0000943	GO:0000943	61	50.382	69	9907	13568	1.21075	0.275901	0.00159601	0.141262		enriched	not_significant
GO	Core	GO:0006402	GO:0006402	55	68.6364	94	9907	13568	0.801325	-0.319541	0.00158681	0.141262		depleted	not_significant
GO	Core	GO:0016866	GO:0016866	20	29.207	40	9907	13568	0.684768	-0.546312	0.00158945	0.141262		depleted	not_significant
GO	Core	GO:0043603	GO:0043603	342	315.435	432	9907	13568	1.08422	0.116653	0.00165642	0.145626		enriched	not_significant
GO	Core	GO:1990234	GO:1990234	292	319.816	438	9907	13568	0.913024	-0.131275	0.00167143	0.146155		depleted	not_significant
GO	Core	GO:2000652	GO:2000652	27	20.4449	28	9907	13568	1.32062	0.40122	0.00168819	0.147168		enriched	not_significant
GO	Core	GO:0033554	GO:0033554	642	681.252	933	9907	13568	0.942382	-0.085616	0.00171752	0.149267		depleted	not_significant
GO	Core	GO:0050789	GO:0050789	3457	3385.09	4636	9907	13568	1.02124	0.030328	0.00174944	0.151116		enriched	not_significant
GO	Core	GO:0034613	GO:0034613	323	351.944	482	9907	13568	0.91776	-0.123811	0.00174789	0.151116		depleted	not_significant
GO	Core	GO:0042594	GO:0042594	105	122.669	168	9907	13568	0.85596	-0.224384	0.00176548	0.151349		depleted	not_significant
GO	Core	GO:0006886	GO:0006886	260	286.228	392	9907	13568	0.908366	-0.138654	0.00178603	0.151967		depleted	not_significant
GO	Core	GO:0044281	GO:0044281	814	857.224	1174	9907	13568	0.949577	-0.074644	0.00181658	0.153647		depleted	not_significant
GO	Core	GO:0009753	GO:0009753	198	178.162	244	9907	13568	1.11135	0.152307	0.00184197	0.154873		enriched	not_significant
GO	Core	GO:0055114	GO:0055114	663	702.427	962	9907	13568	0.94387	-0.08334	0.00187301	0.154917		depleted	not_significant
GO	Core	GO:0016053	GO:0016053	277	303.752	416	9907	13568	0.911927	-0.13301	0.00192145	0.154917		depleted	not_significant
GO	Core	GO:0046394	GO:0046394	277	303.752	416	9907	13568	0.911927	-0.13301	0.00192145	0.154917		depleted	not_significant
GO	Core	GO:0072511	GO:0072511	72	86.8907	119	9907	13568	0.828627	-0.271205	0.00194085	0.154917		depleted	not_significant
GO	Core	GO:0008276	GO:0008276	31	41.6199	57	9907	13568	0.744836	-0.425006	0.00190168	0.154917		depleted	not_significant
GO	Core	GO:0010726	GO:0010726	8	14.6035	20	9907	13568	0.547815	-0.86824	0.00192042	0.154917		depleted	not_significant
GO	Core	GO:0016104	GO:0016104	3	8.0319	11	9907	13568	0.37351	-1.42078	0.00203565	0.160252		depleted	not_significant
GO	Core	GO:0044262	GO:0044262	206	229.275	314	9907	13568	0.898486	-0.154432	0.00206514	0.160387		depleted	not_significant
GO	Core	GO:0005802	GO:0005802	181	202.988	278	9907	13568	0.891677	-0.165407	0.00206295	0.160387		depleted	not_significant
GO	Core	GO:0046835	GO:0046835	19	27.7466	38	9907	13568	0.684768	-0.546312	0.0020673	0.160387		depleted	not_significant
GO	Core	GO:0001671	GO:0001671	1	5.1112	7	9907	13568	0.195648	-2.35367	0.00207122	0.160387		depleted	not_significant
GO	Core	GO:0010178	GO:0010178	1	5.1112	7	9907	13568	0.195648	-2.35367	0.00207122	0.160387		depleted	not_significant
GO	Core	GO:0035145	GO:0035145	1	5.1112	7	9907	13568	0.195648	-2.35367	0.00207122	0.160387		depleted	not_significant
GO	Core	GO:0046906	GO:0046906	37	29.207	40	9907	13568	1.26682	0.341213	0.00211418	0.163269		enriched	not_significant
GO	Core	GO:1901605	GO:1901605	104	121.209	166	9907	13568	0.858023	-0.220912	0.0021357	0.164039		depleted	not_significant
GO	Core	GO:0009685	GO:0009685	26	35.7785	49	9907	13568	0.726693	-0.460582	0.00214834	0.164123		depleted	not_significant
GO	Core	GO:0031152	GO:0031152	2	6.5716	9	9907	13568	0.304341	-1.71624	0.00218357	0.164602		depleted	not_significant
GO	Core	GO:0051539	GO:0051539	2	6.5716	9	9907	13568	0.304341	-1.71624	0.00218357	0.164602		depleted	not_significant
GO	Core	GO:0098630	GO:0098630	2	6.5716	9	9907	13568	0.304341	-1.71624	0.00218357	0.164602		depleted	not_significant
GO	Core	GO:0098743	GO:0098743	2	6.5716	9	9907	13568	0.304341	-1.71624	0.00218357	0.164602		depleted	not_significant
GO	Core	GO:0005634	GO:0005634	2994	2926.54	4008	9907	13568	1.02305	0.03288	0.00219477	0.165009		enriched	not_significant
GO	Core	GO:0016567	GO:0016567	348	322.007	441	9907	13568	1.08072	0.111997	0.00225145	0.167937		enriched	not_significant
GO	Core	GO:0005643	GO:0005643	28	37.969	52	9907	13568	0.737443	-0.439397	0.00230553	0.170627		depleted	not_significant
GO	Core	GO:0008170	GO:0008170	28	37.969	52	9907	13568	0.737443	-0.439397	0.00230553	0.170627		depleted	not_significant
GO	Core	GO:0015925	GO:0015925	16	24.0957	33	9907	13568	0.664018	-0.590706	0.00233526	0.171983		depleted	not_significant
GO	Core	GO:0003899	GO:0003899	7	13.1431	18	9907	13568	0.532598	-0.908882	0.00242898	0.176095		depleted	not_significant
GO	Core	GO:0042273	GO:0042273	75	63.5251	87	9907	13568	1.18064	0.239563	0.00246283	0.177643		enriched	not_significant
GO	Core	GO:0006261	GO:0006261	63	76.6683	105	9907	13568	0.821722	-0.283278	0.00248154	0.178096		depleted	not_significant
GO	Core	GO:0006479	GO:0006479	61	74.4777	102	9907	13568	0.819037	-0.288	0.00249418	0.178096		depleted	not_significant
GO	Core	GO:0008213	GO:0008213	61	74.4777	102	9907	13568	0.819037	-0.288	0.00249418	0.178096		depleted	not_significant
GO	Core	GO:0016114	GO:0016114	61	74.4777	102	9907	13568	0.819037	-0.288	0.00249418	0.178096		depleted	not_significant
GO	Core	GO:0065008	GO:0065008	787	828.017	1134	9907	13568	0.950463	-0.073297	0.00253516	0.180117		depleted	not_significant
GO	Core	GO:0006082	GO:0006082	525	559.313	766	9907	13568	0.938651	-0.091339	0.00257883	0.180958		depleted	not_significant
GO	Core	GO:0043436	GO:0043436	525	559.313	766	9907	13568	0.938651	-0.091339	0.00257883	0.180958		depleted	not_significant
GO	Core	GO:0005982	GO:0005982	32	42.3501	58	9907	13568	0.755606	-0.404293	0.00257361	0.180958		depleted	not_significant
GO	Core	GO:0099402	GO:0099402	818	779.096	1067	9907	13568	1.04994	0.0703	0.00261259	0.182875		enriched	not_significant
GO	Core	GO:0019200	GO:0019200	18	26.2863	36	9907	13568	0.684768	-0.546312	0.00269169	0.186424		depleted	not_significant
GO	Core	GO:0043043	GO:0043043	221	200.798	275	9907	13568	1.10061	0.138303	0.00272227	0.18687		enriched	not_significant
GO	Core	GO:0044093	GO:0044093	163	183.274	251	9907	13568	0.88938	-0.169127	0.00276479	0.18742		depleted	not_significant
GO	Core	GO:0006406	GO:0006406	25	34.3182	47	9907	13568	0.728477	-0.457045	0.00277969	0.18742		depleted	not_significant
GO	Core	GO:0051028	GO:0051028	25	34.3182	47	9907	13568	0.728477	-0.457045	0.00277969	0.18742		depleted	not_significant
GO	Core	GO:0071427	GO:0071427	25	34.3182	47	9907	13568	0.728477	-0.457045	0.00277969	0.18742		depleted	not_significant
GO	Core	GO:0050794	GO:0050794	3048	2982.03	4084	9907	13568	1.02212	0.031568	0.00280677	0.188459		enriched	not_significant
GO	Core	GO:0009719	GO:0009719	1193	1147.1	1571	9907	13568	1.04001	0.056599	0.00281173	0.188459		enriched	not_significant
GO	Core	GO:0070838	GO:0070838	72	86.1605	118	9907	13568	0.83565	-0.25903	0.0029174	0.189291		depleted	not_significant
GO	Core	GO:0003887	GO:0003887	70	59.1441	81	9907	13568	1.18355	0.243121	0.00297109	0.192336		enriched	not_significant
GO	Core	GO:0048366	GO:0048366	291	267.974	367	9907	13568	1.08593	0.118927	0.00300214	0.193465		enriched	not_significant
GO	Core	GO:0051258	GO:0051258	20	28.4768	39	9907	13568	0.702327	-0.509786	0.00302287	0.19436		depleted	not_significant
GO	Core	GO:0004565	GO:0004565	15	22.6354	31	9907	13568	0.662679	-0.593618	0.0030441	0.195283		depleted	not_significant
GO	Core	GO:0017056	GO:0017056	6	11.6828	16	9907	13568	0.513576	-0.96135	0.00305288	0.195405		depleted	not_significant
GO	Core	GO:0061024	GO:0061024	137	155.527	213	9907	13568	0.880876	-0.18299	0.00309117	0.197411		depleted	not_significant
GO	Core	GO:0010256	GO:0010256	54	66.4458	91	9907	13568	0.812692	-0.299219	0.00313292	0.198177		depleted	not_significant
GO	Core	GO:0048513	GO:0048513	52	64.2553	88	9907	13568	0.809272	-0.305304	0.00313072	0.198177		depleted	not_significant
GO	Core	GO:0006606	GO:0006606	29	38.6992	53	9907	13568	0.749369	-0.416252	0.00314989	0.198177		depleted	not_significant
GO	Core	GO:0032182	GO:0032182	29	38.6992	53	9907	13568	0.749369	-0.416252	0.00314989	0.198177		depleted	not_significant
GO	Core	GO:0051170	GO:0051170	29	38.6992	53	9907	13568	0.749369	-0.416252	0.00314989	0.198177		depleted	not_significant
GO	Core	GO:0006412	GO:0006412	213	193.496	265	9907	13568	1.1008	0.138549	0.00316866	0.198334		enriched	not_significant
GO	Core	GO:0010033	GO:0010033	1463	1413.62	1936	9907	13568	1.03493	0.049539	0.00322976	0.200846		enriched	not_significant
GO	Core	GO:0046907	GO:0046907	380	408.897	560	9907	13568	0.929328	-0.105739	0.00326122	0.202359		depleted	not_significant
GO	Core	GO:0006892	GO:0006892	12	18.9845	26	9907	13568	0.632094	-0.661789	0.00331611	0.205317		depleted	not_significant
GO	Core	GO:0032446	GO:0032446	365	339.531	465	9907	13568	1.07501	0.104354	0.0034	0.209598		enriched	not_significant
GO	Core	GO:0009536	GO:0009536	1431	1481.52	2029	9907	13568	0.965898	-0.050057	0.00351505	0.214067		depleted	not_significant
GO	Core	GO:1901361	GO:1901361	174	194.226	266	9907	13568	0.895862	-0.158651	0.00353137	0.214067		depleted	not_significant
GO	Core	GO:0031349	GO:0031349	73	86.8907	119	9907	13568	0.840136	-0.251305	0.00353276	0.214067		depleted	not_significant
GO	Core	GO:0006629	GO:0006629	461	492.137	674	9907	13568	0.936731	-0.094294	0.00355919	0.21467		depleted	not_significant
GO	Core	GO:0019439	GO:0019439	165	184.734	253	9907	13568	0.893176	-0.162983	0.00356537	0.21467		depleted	not_significant
GO	Core	GO:0048699	GO:0048699	35	45.2708	62	9907	13568	0.773126	-0.371225	0.00355117	0.21467		depleted	not_significant
GO	Core	GO:0071554	GO:0071554	311	287.688	394	9907	13568	1.08103	0.112407	0.00364125	0.217854		enriched	not_significant
GO	Core	GO:0002376	GO:0002376	267	291.339	399	9907	13568	0.916457	-0.125861	0.0036585	0.218143		depleted	not_significant
GO	Core	GO:0005829	GO:0005829	1435	1485.17	2034	9907	13568	0.966217	-0.049581	0.00374649	0.221345		depleted	not_significant
GO	Core	GO:0022008	GO:0022008	41	51.8423	71	9907	13568	0.790859	-0.338507	0.00379125	0.221345		depleted	not_significant
GO	Core	GO:0051213	GO:0051213	41	51.8423	71	9907	13568	0.790859	-0.338507	0.00379125	0.221345		depleted	not_significant
GO	Core	GO:0007020	GO:0007020	5	10.2224	14	9907	13568	0.48912	-1.03174	0.00380085	0.221345		depleted	not_significant
GO	Core	GO:0046174	GO:0046174	5	10.2224	14	9907	13568	0.48912	-1.03174	0.00380085	0.221345		depleted	not_significant
GO	Core	GO:0001076	GO:0001076	95	82.5097	113	9907	13568	1.15138	0.203365	0.0038344	0.222802		enriched	not_significant
GO	Core	GO:0016102	GO:0016102	26	35.0483	48	9907	13568	0.741832	-0.430835	0.00384155	0.222802		depleted	not_significant
GO	Core	GO:0044283	GO:0044283	370	397.945	545	9907	13568	0.929777	-0.105043	0.003862	0.223532		depleted	not_significant
GO	Core	GO:0019787	GO:0019787	329	305.213	418	9907	13568	1.07794	0.108273	0.00391158	0.225872		enriched	not_significant
GO	Core	GO:0007030	GO:0007030	19	27.0164	37	9907	13568	0.703276	-0.507838	0.00393517	0.226384		depleted	not_significant
GO	Core	GO:0009507	GO:0009507	1372	1420.92	1946	9907	13568	0.965573	-0.050543	0.00397431	0.227049		depleted	not_significant
GO	Core	GO:0051649	GO:0051649	409	438.104	600	9907	13568	0.933568	-0.099174	0.00397869	0.227049		depleted	not_significant
GO	Core	GO:0019842	GO:0019842	14	21.175	29	9907	13568	0.661156	-0.596938	0.00397347	0.227049		depleted	not_significant
GO	Core	GO:0022607	GO:0022607	544	576.837	790	9907	13568	0.943073	-0.084558	0.0041524	0.234141		depleted	not_significant
GO	Core	GO:0004518	GO:0004518	488	459.279	629	9907	13568	1.06253	0.087509	0.00418698	0.234321		enriched	not_significant
GO	Core	GO:0000989	GO:0000989	98	85.4304	117	9907	13568	1.14713	0.198033	0.00422434	0.234321		enriched	not_significant
GO	Core	GO:0002218	GO:0002218	30	39.4294	54	9907	13568	0.760854	-0.394309	0.00424017	0.234321		depleted	not_significant
GO	Core	GO:0010311	GO:0010311	60	50.382	69	9907	13568	1.1909	0.252054	0.00429935	0.235875		enriched	not_significant
GO	Core	GO:0034062	GO:0034062	8	13.8733	19	9907	13568	0.576647	-0.79424	0.00437035	0.237478		depleted	not_significant
GO	Core	GO:0097747	GO:0097747	8	13.8733	19	9907	13568	0.576647	-0.79424	0.00437035	0.237478		depleted	not_significant
GO	Core	GO:0048827	GO:0048827	417	390.643	535	9907	13568	1.06747	0.094196	0.00447951	0.242482		enriched	not_significant
GO	Core	GO:0005773	GO:0005773	615	649.125	889	9907	13568	0.94743	-0.077909	0.0046635	0.248653		depleted	not_significant
GO	Core	GO:1902903	GO:1902903	36	46.001	63	9907	13568	0.782592	-0.353667	0.00464154	0.248653		depleted	not_significant
GO	Core	GO:0042054	GO:0042054	23	31.3975	43	9907	13568	0.732543	-0.449015	0.00466173	0.248653		depleted	not_significant
GO	Core	GO:0043248	GO:0043248	4	8.7621	12	9907	13568	0.456512	-1.13128	0.00466238	0.248653		depleted	not_significant
GO	Core	GO:0000988	GO:0000988	108	94.9226	130	9907	13568	1.13777	0.186208	0.00471721	0.250109		enriched	not_significant
GO	Core	GO:0061695	GO:0061695	96	110.986	152	9907	13568	0.864971	-0.209277	0.00475852	0.250895		depleted	not_significant
GO	Core	GO:0043227	GO:0043227	6140	6205.02	8498	9907	13568	0.989522	-0.015197	0.00488251	0.251756		depleted	not_significant
GO	Core	GO:0005938	GO:0005938	81	94.9226	130	9907	13568	0.853327	-0.22883	0.00478633	0.251756		depleted	not_significant
GO	Core	GO:0006887	GO:0006887	52	63.5251	87	9907	13568	0.818574	-0.288816	0.00488438	0.251756		depleted	not_significant
GO	Core	GO:0016571	GO:0016571	52	63.5251	87	9907	13568	0.818574	-0.288816	0.00488438	0.251756		depleted	not_significant
GO	Core	GO:0045089	GO:0045089	48	59.1441	81	9907	13568	0.811577	-0.3012	0.00490774	0.251756		depleted	not_significant
GO	Core	GO:0051168	GO:0051168	48	59.1441	81	9907	13568	0.811577	-0.3012	0.00490774	0.251756		depleted	not_significant
GO	Core	GO:0003774	GO:0003774	44	54.763	75	9907	13568	0.803462	-0.315699	0.0048828	0.251756		depleted	not_significant
GO	Core	GO:0044448	GO:0044448	44	54.763	75	9907	13568	0.803462	-0.315699	0.0048828	0.251756		depleted	not_significant
GO	Core	GO:0003690	GO:0003690	212	193.496	265	9907	13568	1.09563	0.13176	0.00493029	0.252377		enriched	not_significant
GO	Core	GO:0031667	GO:0031667	145	162.829	223	9907	13568	0.890506	-0.167303	0.00495754	0.252488		depleted	not_significant
GO	Core	GO:0044282	GO:0044282	103	118.288	162	9907	13568	0.870755	-0.199662	0.0051209	0.257043		depleted	not_significant
GO	Core	GO:0042788	GO:0042788	59	49.6518	68	9907	13568	1.18827	0.248868	0.00517109	0.257043		enriched	not_significant
GO	Core	GO:1903338	GO:1903338	38	30.6673	42	9907	13568	1.2391	0.309298	0.00509064	0.257043		enriched	not_significant
GO	Core	GO:1902532	GO:1902532	27	35.7785	49	9907	13568	0.754643	-0.406134	0.0052212	0.257043		depleted	not_significant
GO	Core	GO:0006555	GO:0006555	13	19.7147	27	9907	13568	0.659407	-0.60076	0.00519451	0.257043		depleted	not_significant
GO	Core	GO:0003896	GO:0003896	0	2.9207	4	9907	13568	0		0.00529439	0.257043		depleted	not_significant
GO	Core	GO:0003999	GO:0003999	0	2.9207	4	9907	13568	0		0.00529439	0.257043		depleted	not_significant
GO	Core	GO:0004124	GO:0004124	0	2.9207	4	9907	13568	0		0.00529439	0.257043		depleted	not_significant
GO	Core	GO:0006535	GO:0006535	0	2.9207	4	9907	13568	0		0.00529439	0.257043		depleted	not_significant
GO	Core	GO:0010581	GO:0010581	0	2.9207	4	9907	13568	0		0.00529439	0.257043		depleted	not_significant
GO	Core	GO:0015368	GO:0015368	0	2.9207	4	9907	13568	0		0.00529439	0.257043		depleted	not_significant
GO	Core	GO:0046786	GO:0046786	0	2.9207	4	9907	13568	0		0.00529439	0.257043		depleted	not_significant
GO	Core	GO:0043226	GO:0043226	6407	6470.07	8861	9907	13568	0.990252	-0.014133	0.00541731	0.260498		depleted	not_significant
GO	Core	GO:0046903	GO:0046903	65	77.3984	106	9907	13568	0.83981	-0.251865	0.00559742	0.264386		depleted	not_significant
GO	Core	GO:0051536	GO:0051536	31	40.1596	55	9907	13568	0.771921	-0.373475	0.00562824	0.264386		depleted	not_significant
GO	Core	GO:0051540	GO:0051540	31	40.1596	55	9907	13568	0.771921	-0.373475	0.00562824	0.264386		depleted	not_significant
GO	Core	GO:0051494	GO:0051494	20	27.7466	38	9907	13568	0.720809	-0.472312	0.00561626	0.264386		depleted	not_significant
GO	Core	GO:1902904	GO:1902904	20	27.7466	38	9907	13568	0.720809	-0.472312	0.00561626	0.264386		depleted	not_significant
GO	Core	GO:0009067	GO:0009067	10	16.0638	22	9907	13568	0.622517	-0.683816	0.0056377	0.264386		depleted	not_significant
GO	Core	GO:0009875	GO:0009875	10	16.0638	22	9907	13568	0.622517	-0.683816	0.0056377	0.264386		depleted	not_significant
GO	Core	GO:0009086	GO:0009086	7	12.413	17	9907	13568	0.563927	-0.82642	0.00563122	0.264386		depleted	not_significant
GO	Core	GO:0030140	GO:0030140	7	12.413	17	9907	13568	0.563927	-0.82642	0.00563122	0.264386		depleted	not_significant
GO	Core	GO:0006563	GO:0006563	3	7.3017	10	9907	13568	0.410861	-1.28328	0.00557953	0.264386		depleted	not_significant
GO	Core	GO:0030866	GO:0030866	3	7.3017	10	9907	13568	0.410861	-1.28328	0.00557953	0.264386		depleted	not_significant
GO	Core	GO:0016874	GO:0016874	82	95.6528	131	9907	13568	0.857267	-0.222183	0.00567995	0.265928		depleted	not_significant
GO	Core	GO:0090305	GO:0090305	531	502.36	688	9907	13568	1.05701	0.079991	0.00594992	0.275841		enriched	not_significant
GO	Core	GO:0006520	GO:0006520	167	185.464	254	9907	13568	0.900443	-0.151292	0.00598954	0.276775		depleted	not_significant
GO	Core	GO:0050778	GO:0050778	55	66.4458	91	9907	13568	0.827742	-0.272747	0.00598658	0.276775		depleted	not_significant
GO	Core	GO:0044248	GO:0044248	714	749.159	1026	9907	13568	0.953069	-0.069347	0.00601289	0.277403		depleted	not_significant
GO	Core	GO:0009686	GO:0009686	22	29.9371	41	9907	13568	0.734873	-0.444432	0.00604295	0.278338		depleted	not_significant
GO	Core	GO:0043604	GO:0043604	264	243.878	334	9907	13568	1.08251	0.114378	0.00618659	0.281758		enriched	not_significant
GO	Core	GO:0004842	GO:0004842	317	294.99	404	9907	13568	1.07461	0.103815	0.0063161	0.284916		enriched	not_significant
GO	Core	GO:0008219	GO:0008219	100	114.637	157	9907	13568	0.872316	-0.197077	0.00631129	0.284916		depleted	not_significant
GO	Core	GO:0031154	GO:0031154	2	5.8414	8	9907	13568	0.342384	-1.54631	0.00638291	0.286113		depleted	not_significant
GO	Core	GO:0050982	GO:0050982	2	5.8414	8	9907	13568	0.342384	-1.54631	0.00638291	0.286113		depleted	not_significant
GO	Core	GO:2000904	GO:2000904	2	5.8414	8	9907	13568	0.342384	-1.54631	0.00638291	0.286113		depleted	not_significant
GO	Core	GO:0044255	GO:0044255	408	435.184	596	9907	13568	0.937535	-0.093055	0.00645453	0.287961		depleted	not_significant
GO	Core	GO:2000028	GO:2000028	73	62.795	86	9907	13568	1.16251	0.217248	0.00661971	0.290378		enriched	not_significant
GO	Core	GO:0000938	GO:0000938	1	4.381	6	9907	13568	0.228256	-2.13128	0.00664068	0.290378		depleted	not_significant
GO	Core	GO:0012510	GO:0012510	1	4.381	6	9907	13568	0.228256	-2.13128	0.00664068	0.290378		depleted	not_significant
GO	Core	GO:0032435	GO:0032435	1	4.381	6	9907	13568	0.228256	-2.13128	0.00664068	0.290378		depleted	not_significant
GO	Core	GO:0034453	GO:0034453	1	4.381	6	9907	13568	0.228256	-2.13128	0.00664068	0.290378		depleted	not_significant
GO	Core	GO:0048457	GO:0048457	1	4.381	6	9907	13568	0.228256	-2.13128	0.00664068	0.290378		depleted	not_significant
GO	Core	GO:0097327	GO:0097327	1	4.381	6	9907	13568	0.228256	-2.13128	0.00664068	0.290378		depleted	not_significant
GO	Core	GO:2000059	GO:2000059	1	4.381	6	9907	13568	0.228256	-2.13128	0.00664068	0.290378		depleted	not_significant
GO	Core	GO:0044042	GO:0044042	96	110.256	151	9907	13568	0.870699	-0.199754	0.00668463	0.291741		depleted	not_significant
GO	Core	GO:0043229	GO:0043229	6390	6451.09	8835	9907	13568	0.990531	-0.013726	0.0068757	0.294278		depleted	not_significant
GO	Core	GO:0004396	GO:0004396	6	10.9526	15	9907	13568	0.547815	-0.86824	0.0072388	0.302974		depleted	not_significant
GO	Core	GO:0006722	GO:0006722	6	10.9526	15	9907	13568	0.547815	-0.86824	0.0072388	0.302974		depleted	not_significant
GO	Core	GO:0008865	GO:0008865	6	10.9526	15	9907	13568	0.547815	-0.86824	0.0072388	0.302974		depleted	not_significant
GO	Core	GO:0016973	GO:0016973	6	10.9526	15	9907	13568	0.547815	-0.86824	0.0072388	0.302974		depleted	not_significant
GO	Core	GO:0032479	GO:0032479	6	10.9526	15	9907	13568	0.547815	-0.86824	0.0072388	0.302974		depleted	not_significant
GO	Core	GO:0045005	GO:0045005	6	10.9526	15	9907	13568	0.547815	-0.86824	0.0072388	0.302974		depleted	not_significant
GO	Core	GO:0070252	GO:0070252	6	10.9526	15	9907	13568	0.547815	-0.86824	0.0072388	0.302974		depleted	not_significant
GO	Core	GO:0003964	GO:0003964	61	51.8423	71	9907	13568	1.17664	0.234678	0.00730276	0.30373		enriched	not_significant
GO	Core	GO:0001817	GO:0001817	9	14.6035	20	9907	13568	0.616292	-0.698315	0.00736471	0.30373		depleted	not_significant
GO	Core	GO:0009612	GO:0009612	9	14.6035	20	9907	13568	0.616292	-0.698315	0.00736471	0.30373		depleted	not_significant
GO	Core	GO:0015095	GO:0015095	9	14.6035	20	9907	13568	0.616292	-0.698315	0.00736471	0.30373		depleted	not_significant
GO	Core	GO:0030864	GO:0030864	9	14.6035	20	9907	13568	0.616292	-0.698315	0.00736471	0.30373		depleted	not_significant
GO	Core	GO:1903830	GO:1903830	9	14.6035	20	9907	13568	0.616292	-0.698315	0.00736471	0.30373		depleted	not_significant
GO	Core	GO:0009524	GO:0009524	54	64.9855	89	9907	13568	0.830955	-0.267158	0.00742203	0.304807		depleted	not_significant
GO	Core	GO:0034504	GO:0034504	34	43.0803	59	9907	13568	0.789225	-0.341492	0.00750467	0.307313		depleted	not_significant
GO	Core	GO:0018205	GO:0018205	99	113.177	155	9907	13568	0.874736	-0.19308	0.0075495	0.308704		depleted	not_significant
GO	Core	GO:0043228	GO:0043228	1104	1144.91	1568	9907	13568	0.964266	-0.052497	0.0075893	0.308998		depleted	not_significant
GO	Core	GO:0043232	GO:0043232	1104	1144.91	1568	9907	13568	0.964266	-0.052497	0.0075893	0.308998		depleted	not_significant
GO	Core	GO:0071705	GO:0071705	447	474.613	650	9907	13568	0.94182	-0.086477	0.00762263	0.309911		depleted	not_significant
GO	Core	GO:0071229	GO:0071229	330	308.133	422	9907	13568	1.07096	0.098911	0.00770456	0.309925		enriched	not_significant
GO	Core	GO:0006914	GO:0006914	44	54.0329	74	9907	13568	0.814319	-0.296334	0.00771272	0.309925		depleted	not_significant
GO	Core	GO:0061919	GO:0061919	44	54.0329	74	9907	13568	0.814319	-0.296334	0.00771272	0.309925		depleted	not_significant
GO	Core	GO:0006473	GO:0006473	42	51.8423	71	9907	13568	0.810148	-0.303742	0.00772113	0.309925		depleted	not_significant
GO	Core	GO:0006475	GO:0006475	38	47.4613	65	9907	13568	0.800652	-0.320752	0.00766898	0.309925		depleted	not_significant
GO	Core	GO:0018393	GO:0018393	38	47.4613	65	9907	13568	0.800652	-0.320752	0.00766898	0.309925		depleted	not_significant
GO	Core	GO:0018394	GO:0018394	38	47.4613	65	9907	13568	0.800652	-0.320752	0.00766898	0.309925		depleted	not_significant
GO	Core	GO:0004519	GO:0004519	382	358.515	491	9907	13568	1.0655	0.091538	0.00778906	0.310868		enriched	not_significant
GO	Core	GO:0044433	GO:0044433	126	141.654	194	9907	13568	0.889493	-0.168945	0.00784309	0.310868		depleted	not_significant
GO	Core	GO:0030587	GO:0030587	14	20.4449	28	9907	13568	0.684768	-0.546312	0.00784146	0.310868		depleted	not_significant
GO	Core	GO:0043967	GO:0043967	14	20.4449	28	9907	13568	0.684768	-0.546312	0.00784146	0.310868		depleted	not_significant
GO	Core	GO:0090702	GO:0090702	14	20.4449	28	9907	13568	0.684768	-0.546312	0.00784146	0.310868		depleted	not_significant
GO	Core	GO:0099120	GO:0099120	14	20.4449	28	9907	13568	0.684768	-0.546312	0.00784146	0.310868		depleted	not_significant
GO	Core	GO:0005694	GO:0005694	285	307.403	421	9907	13568	0.927121	-0.10917	0.00803283	0.316623		depleted	not_significant
GO	Core	GO:0009056	GO:0009056	800	835.319	1144	9907	13568	0.957718	-0.062327	0.00812144	0.319672		depleted	not_significant
GO	Core	GO:0042221	GO:0042221	2067	2016.74	2762	9907	13568	1.02492	0.035513	0.00817596	0.321373		enriched	not_significant
GO	Core	GO:0006073	GO:0006073	93	106.605	146	9907	13568	0.872376	-0.196978	0.00824738	0.322841		depleted	not_significant
GO	Core	GO:0016052	GO:0016052	93	106.605	146	9907	13568	0.872376	-0.196978	0.00824738	0.322841		depleted	not_significant
GO	Core	GO:0016706	GO:0016706	23	30.6673	42	9907	13568	0.749984	-0.415068	0.00828767	0.323971		depleted	not_significant
GO	Core	GO:0032940	GO:0032940	63	74.4777	102	9907	13568	0.84589	-0.241458	0.00843739	0.325349		depleted	not_significant
GO	Core	GO:0006721	GO:0006721	91	104.415	143	9907	13568	0.871523	-0.198389	0.0084907	0.326961		depleted	not_significant
GO	Core	GO:0035770	GO:0035770	61	72.2872	99	9907	13568	0.843856	-0.244931	0.00860038	0.328514		depleted	not_significant
GO	Core	GO:0044454	GO:0044454	120	135.082	185	9907	13568	0.888348	-0.170803	0.00865676	0.328647		depleted	not_significant
GO	Core	GO:0015085	GO:0015085	25	32.8578	45	9907	13568	0.760854	-0.394309	0.00866106	0.328647		depleted	not_significant
GO	Core	GO:0042493	GO:0042493	474	448.327	614	9907	13568	1.05726	0.080336	0.00878978	0.32868		enriched	not_significant
GO	Core	GO:0008299	GO:0008299	76	88.351	121	9907	13568	0.860205	-0.217248	0.00876738	0.32868		depleted	not_significant
GO	Core	GO:0030136	GO:0030136	16	22.6354	31	9907	13568	0.706858	-0.500508	0.00874761	0.32868		depleted	not_significant
GO	Core	GO:0045995	GO:0045995	16	22.6354	31	9907	13568	0.706858	-0.500508	0.00874761	0.32868		depleted	not_significant
GO	Core	GO:0018193	GO:0018193	255	276.006	378	9907	13568	0.923894	-0.114201	0.00881199	0.329078		depleted	not_significant
GO	Core	GO:0042592	GO:0042592	332	355.595	487	9907	13568	0.933647	-0.099051	0.00891134	0.329448		depleted	not_significant
GO	Core	GO:0000786	GO:0000786	15	10.9526	15	9907	13568	1.36954	0.453688	0.00891563	0.329448		enriched	not_significant
GO	Core	GO:0031492	GO:0031492	15	10.9526	15	9907	13568	1.36954	0.453688	0.00891563	0.329448		enriched	not_significant
GO	Core	GO:0001678	GO:0001678	11	16.794	23	9907	13568	0.654996	-0.610442	0.00892625	0.329448		depleted	not_significant
GO	Core	GO:0030139	GO:0030139	11	16.794	23	9907	13568	0.654996	-0.610442	0.00892625	0.329448		depleted	not_significant
GO	Core	GO:0043130	GO:0043130	27	35.0483	48	9907	13568	0.770364	-0.376387	0.00896596	0.330484		depleted	not_significant
GO	Core	GO:0010410	GO:0010410	48	40.1596	55	9907	13568	1.19523	0.257291	0.00902751	0.331464		enriched	not_significant
GO	Core	GO:0006403	GO:0006403	55	65.7157	90	9907	13568	0.836939	-0.256805	0.00905391	0.332004		depleted	not_significant
GO	Core	GO:0001664	GO:0001664	5	9.4923	13	9907	13568	0.526745	-0.924824	0.00926774	0.3381		depleted	not_significant
GO	Core	GO:0008250	GO:0008250	5	9.4923	13	9907	13568	0.526745	-0.924824	0.00926774	0.3381		depleted	not_significant
GO	Core	GO:0080111	GO:0080111	5	9.4923	13	9907	13568	0.526745	-0.924824	0.00926774	0.3381		depleted	not_significant
GO	Core	GO:0044431	GO:0044431	258	278.926	382	9907	13568	0.924975	-0.112514	0.00931621	0.338998		depleted	not_significant
GO	Core	GO:0006816	GO:0006816	31	39.4294	54	9907	13568	0.786216	-0.347003	0.00939641	0.340608		depleted	not_significant
GO	Core	GO:0060589	GO:0060589	31	39.4294	54	9907	13568	0.786216	-0.347003	0.00939641	0.340608		depleted	not_significant
GO	Core	GO:0071322	GO:0071322	49	59.1441	81	9907	13568	0.828485	-0.271452	0.009424	0.341173		depleted	not_significant
GO	Core	GO:0009251	GO:0009251	18	24.8259	34	9907	13568	0.725049	-0.46385	0.00952372	0.34347		depleted	not_significant
GO	Core	GO:0051194	GO:0051194	18	24.8259	34	9907	13568	0.725049	-0.46385	0.00952372	0.34347		depleted	not_significant
GO	Core	GO:0031669	GO:0031669	123	138.003	189	9907	13568	0.891286	-0.16604	0.00954621	0.343845		depleted	not_significant
GO	Core	GO:0005769	GO:0005769	45	54.763	75	9907	13568	0.821722	-0.283278	0.00959933	0.345321		depleted	not_significant
GO	Core	GO:0009756	GO:0009756	35	43.8104	60	9907	13568	0.798896	-0.32392	0.00962821	0.345485		depleted	not_significant
GO	Core	GO:0010182	GO:0010182	35	43.8104	60	9907	13568	0.798896	-0.32392	0.00962821	0.345485		depleted	not_significant
GO	Core	GO:0010501	GO:0010501	41	50.382	69	9907	13568	0.813783	-0.297285	0.00969426	0.34732		depleted	not_significant
GO	Core	GO:0016101	GO:0016101	39	48.1915	66	9907	13568	0.809272	-0.305304	0.00970379	0.34732		depleted	not_significant
GO	Core	GO:0044425	GO:0044425	928	964.56	1321	9907	13568	0.962097	-0.055746	0.00976032	0.348904		depleted	not_significant
GO	Core	GO:0017038	GO:0017038	81	93.4623	128	9907	13568	0.86666	-0.206462	0.00978359	0.349296		depleted	not_significant
GO	Core	GO:0045088	GO:0045088	92	105.145	144	9907	13568	0.874982	-0.192675	0.00987345	0.352062		depleted	not_significant
GO	Core	GO:0062012	GO:0062012	106	94.1924	129	9907	13568	1.12536	0.170381	0.00992356	0.352611		enriched	not_significant
GO	Core	GO:0016491	GO:0016491	565	594.362	814	9907	13568	0.9506	-0.07309	0.00996715	0.352779		depleted	not_significant
GO	Core	GO:1901135	GO:1901135	368	392.103	537	9907	13568	0.938528	-0.091528	0.0103635	0.361359		depleted	not_significant
GO	Core	GO:0009620	GO:0009620	289	269.434	369	9907	13568	1.07262	0.101137	0.0105172	0.361866		enriched	not_significant
GO	Core	GO:0036464	GO:0036464	60	70.8269	97	9907	13568	0.847136	-0.239334	0.0105518	0.362603		depleted	not_significant
GO	Core	GO:0034061	GO:0034061	70	60.6044	83	9907	13568	1.15503	0.207932	0.0106876	0.365062		enriched	not_significant
GO	Core	GO:0051703	GO:0051703	22	29.207	40	9907	13568	0.753245	-0.408809	0.0107187	0.365683		depleted	not_significant
GO	Core	GO:0048285	GO:0048285	156	172.321	236	9907	13568	0.905287	-0.143553	0.0107817	0.366226		depleted	not_significant
GO	Core	GO:0010193	GO:0010193	43	35.7785	49	9907	13568	1.20184	0.265243	0.0108246	0.367093		enriched	not_significant
GO	Core	GO:0000228	GO:0000228	131	146.035	200	9907	13568	0.897047	-0.156745	0.0110954	0.369647		depleted	not_significant
GO	Core	GO:0000977	GO:0000977	77	67.176	92	9907	13568	1.14624	0.196913	0.0111543	0.369647		enriched	not_significant
GO	Core	GO:0001012	GO:0001012	77	67.176	92	9907	13568	1.14624	0.196913	0.0111543	0.369647		enriched	not_significant
GO	Core	GO:0005819	GO:0005819	56	66.4458	91	9907	13568	0.842792	-0.246752	0.010971	0.369647		depleted	not_significant
GO	Core	GO:0051493	GO:0051493	56	66.4458	91	9907	13568	0.842792	-0.246752	0.010971	0.369647		depleted	not_significant
GO	Core	GO:0000978	GO:0000978	30	24.0957	33	9907	13568	1.24503	0.316184	0.0111503	0.369647		enriched	not_significant
GO	Core	GO:0009451	GO:0009451	425	401.596	550	9907	13568	1.05828	0.081719	0.0113908	0.373806		enriched	not_significant
GO	Core	GO:0099568	GO:0099568	93	105.875	145	9907	13568	0.878392	-0.187062	0.0114389	0.374933		depleted	not_significant
GO	Core	GO:0031109	GO:0031109	15	21.175	29	9907	13568	0.708381	-0.497402	0.0114516	0.374933		depleted	not_significant
GO	Core	GO:0034622	GO:0034622	282	303.022	415	9907	13568	0.930625	-0.103728	0.0114929	0.375191		depleted	not_significant
GO	Core	GO:0000278	GO:0000278	187	204.449	280	9907	13568	0.914655	-0.128701	0.0116707	0.375191		depleted	not_significant
GO	Core	GO:0032259	GO:0032259	180	197.147	270	9907	13568	0.913024	-0.131275	0.0117012	0.375191		depleted	not_significant
GO	Core	GO:0000956	GO:0000956	50	59.8743	82	9907	13568	0.835083	-0.260008	0.0115367	0.375191		depleted	not_significant
GO	Core	GO:0051345	GO:0051345	48	57.6837	79	9907	13568	0.832124	-0.26513	0.0117004	0.375191		depleted	not_significant
GO	Core	GO:0070588	GO:0070588	26	33.588	46	9907	13568	0.774086	-0.369434	0.0115068	0.375191		depleted	not_significant
GO	Core	GO:0006534	GO:0006534	10	15.3337	21	9907	13568	0.65216	-0.616701	0.01174	0.375191		depleted	not_significant
GO	Core	GO:0006690	GO:0006690	10	15.3337	21	9907	13568	0.65216	-0.616701	0.01174	0.375191		depleted	not_significant
GO	Core	GO:0016620	GO:0016620	10	15.3337	21	9907	13568	0.65216	-0.616701	0.01174	0.375191		depleted	not_significant
GO	Core	GO:0045202	GO:0045202	10	15.3337	21	9907	13568	0.65216	-0.616701	0.01174	0.375191		depleted	not_significant
GO	Core	GO:1901654	GO:1901654	10	15.3337	21	9907	13568	0.65216	-0.616701	0.01174	0.375191		depleted	not_significant
GO	Core	GO:0005720	GO:0005720	4	8.0319	11	9907	13568	0.498013	-1.00574	0.0117813	0.375191		depleted	not_significant
GO	Core	GO:0006893	GO:0006893	4	8.0319	11	9907	13568	0.498013	-1.00574	0.0117813	0.375191		depleted	not_significant
GO	Core	GO:0016273	GO:0016273	4	8.0319	11	9907	13568	0.498013	-1.00574	0.0117813	0.375191		depleted	not_significant
GO	Core	GO:0016274	GO:0016274	4	8.0319	11	9907	13568	0.498013	-1.00574	0.0117813	0.375191		depleted	not_significant
GO	Core	GO:0034329	GO:0034329	4	8.0319	11	9907	13568	0.498013	-1.00574	0.0117813	0.375191		depleted	not_significant
GO	Core	GO:0035246	GO:0035246	4	8.0319	11	9907	13568	0.498013	-1.00574	0.0117813	0.375191		depleted	not_significant
GO	Core	GO:0052745	GO:0052745	4	8.0319	11	9907	13568	0.498013	-1.00574	0.0117813	0.375191		depleted	not_significant
GO	Core	GO:0019637	GO:0019637	326	348.293	477	9907	13568	0.935994	-0.095429	0.0119164	0.375445		depleted	not_significant
GO	Core	GO:0016604	GO:0016604	100	113.177	155	9907	13568	0.883572	-0.17858	0.0119911	0.375552		depleted	not_significant
GO	Core	GO:0006338	GO:0006338	42	51.1122	70	9907	13568	0.821722	-0.283278	0.0120798	0.375552		depleted	not_significant
GO	Core	GO:0030135	GO:0030135	32	40.1596	55	9907	13568	0.796821	-0.327672	0.0121048	0.375552		depleted	not_significant
GO	Core	GO:0016722	GO:0016722	30	37.969	52	9907	13568	0.790117	-0.339861	0.011971	0.375552		depleted	not_significant
GO	Core	GO:0015865	GO:0015865	25	19.7147	27	9907	13568	1.26809	0.342657	0.0120352	0.375552		enriched	not_significant
GO	Core	GO:0015868	GO:0015868	25	19.7147	27	9907	13568	1.26809	0.342657	0.0120352	0.375552		enriched	not_significant
GO	Core	GO:0051503	GO:0051503	25	19.7147	27	9907	13568	1.26809	0.342657	0.0120352	0.375552		enriched	not_significant
GO	Core	GO:0030865	GO:0030865	36	44.5406	61	9907	13568	0.808251	-0.307124	0.0122148	0.376912		depleted	not_significant
GO	Core	GO:0009638	GO:0009638	14	10.2224	14	9907	13568	1.36954	0.453688	0.0122149	0.376912		enriched	not_significant
GO	Core	GO:1901957	GO:1901957	14	10.2224	14	9907	13568	1.36954	0.453688	0.0122149	0.376912		enriched	not_significant
GO	Core	GO:0000987	GO:0000987	34	27.7466	38	9907	13568	1.22538	0.293223	0.0122675	0.377395		enriched	not_significant
GO	Core	GO:0016651	GO:0016651	63	73.7476	101	9907	13568	0.854265	-0.227244	0.0123466	0.377498		depleted	not_significant
GO	Core	GO:0051020	GO:0051020	63	73.7476	101	9907	13568	0.854265	-0.227244	0.0123466	0.377498		depleted	not_significant
GO	Core	GO:0009750	GO:0009750	17	23.3656	32	9907	13568	0.727566	-0.458849	0.0124247	0.379266		depleted	not_significant
GO	Core	GO:0016788	GO:0016788	748	717.761	983	9907	13568	1.04213	0.059535	0.0125643	0.382706		enriched	not_significant
GO	Core	GO:0008198	GO:0008198	7	11.6828	16	9907	13568	0.599172	-0.738957	0.0126207	0.382783		depleted	not_significant
GO	Core	GO:0044030	GO:0044030	7	11.6828	16	9907	13568	0.599172	-0.738957	0.0126207	0.382783		depleted	not_significant
GO	Core	GO:0098876	GO:0098876	7	11.6828	16	9907	13568	0.599172	-0.738957	0.0126207	0.382783		depleted	not_significant
GO	Core	GO:0009755	GO:0009755	366	344.642	472	9907	13568	1.06197	0.086745	0.0127525	0.385545		enriched	not_significant
GO	Core	GO:1902531	GO:1902531	74	85.4304	117	9907	13568	0.866203	-0.207223	0.0128257	0.386935		depleted	not_significant
GO	Core	GO:0044435	GO:0044435	832	865.256	1185	9907	13568	0.961565	-0.056544	0.0129562	0.390459		depleted	not_significant
GO	Core	GO:0009642	GO:0009642	144	130.701	179	9907	13568	1.10175	0.139797	0.0130342	0.392393		enriched	not_significant
GO	Core	GO:0010494	GO:0010494	19	25.5561	35	9907	13568	0.743463	-0.427668	0.0132247	0.396031		depleted	not_significant
GO	Core	GO:0033365	GO:0033365	193	210.29	288	9907	13568	0.91778	-0.12378	0.0132956	0.397152		depleted	not_significant
GO	Core	GO:0008144	GO:0008144	144	159.178	218	9907	13568	0.904648	-0.144571	0.0133041	0.397152		depleted	not_significant
GO	Core	GO:0031935	GO:0031935	12	17.5242	24	9907	13568	0.684768	-0.546312	0.0135313	0.400568		depleted	not_significant
GO	Core	GO:0046785	GO:0046785	12	17.5242	24	9907	13568	0.684768	-0.546312	0.0135313	0.400568		depleted	not_significant
GO	Core	GO:1901607	GO:1901607	70	81.0493	111	9907	13568	0.863672	-0.211445	0.0135499	0.400702		depleted	not_significant
GO	Core	GO:0006325	GO:0006325	217	235.116	322	9907	13568	0.922949	-0.115678	0.0137185	0.404844		depleted	not_significant
GO	Core	GO:0098657	GO:0098657	51	60.6044	83	9907	13568	0.841523	-0.248926	0.0140195	0.412442		depleted	not_significant
GO	Core	GO:0043161	GO:0043161	201	185.464	254	9907	13568	1.08377	0.116055	0.0142879	0.412546		enriched	not_significant
GO	Core	GO:0043543	GO:0043543	49	58.4139	80	9907	13568	0.838841	-0.25353	0.0142694	0.412546		depleted	not_significant
GO	Core	GO:0050657	GO:0050657	49	58.4139	80	9907	13568	0.838841	-0.25353	0.0142694	0.412546		depleted	not_significant
GO	Core	GO:0050658	GO:0050658	49	58.4139	80	9907	13568	0.838841	-0.25353	0.0142694	0.412546		depleted	not_significant
GO	Core	GO:0051236	GO:0051236	49	58.4139	80	9907	13568	0.838841	-0.25353	0.0142694	0.412546		depleted	not_significant
GO	Core	GO:0006405	GO:0006405	47	56.2234	77	9907	13568	0.835951	-0.25851	0.0145046	0.416792		depleted	not_significant
GO	Core	GO:0009743	GO:0009743	115	128.511	176	9907	13568	0.894868	-0.160254	0.0146009	0.418291		depleted	not_significant
GO	Core	GO:0044728	GO:0044728	25	32.1277	44	9907	13568	0.778146	-0.361888	0.014766	0.418822		depleted	not_significant
GO	Core	GO:0004340	GO:0004340	3	6.5716	9	9907	13568	0.456512	-1.13128	0.0147816	0.418822		depleted	not_significant
GO	Core	GO:0010438	GO:0010438	3	6.5716	9	9907	13568	0.456512	-1.13128	0.0147816	0.418822		depleted	not_significant
GO	Core	GO:0014074	GO:0014074	3	6.5716	9	9907	13568	0.456512	-1.13128	0.0147816	0.418822		depleted	not_significant
GO	Core	GO:0019158	GO:0019158	3	6.5716	9	9907	13568	0.456512	-1.13128	0.0147816	0.418822		depleted	not_significant
GO	Core	GO:0019919	GO:0019919	3	6.5716	9	9907	13568	0.456512	-1.13128	0.0147816	0.418822		depleted	not_significant
GO	Core	GO:0030900	GO:0030900	3	6.5716	9	9907	13568	0.456512	-1.13128	0.0147816	0.418822		depleted	not_significant
GO	Core	GO:0035242	GO:0035242	3	6.5716	9	9907	13568	0.456512	-1.13128	0.0147816	0.418822		depleted	not_significant
GO	Core	GO:0055037	GO:0055037	3	6.5716	9	9907	13568	0.456512	-1.13128	0.0147816	0.418822		depleted	not_significant
GO	Core	GO:0060590	GO:0060590	3	6.5716	9	9907	13568	0.456512	-1.13128	0.0147816	0.418822		depleted	not_significant
GO	Core	GO:0036094	GO:0036094	273	292.8	401	9907	13568	0.932378	-0.101013	0.0147987	0.41889		depleted	not_significant
GO	Core	GO:0048367	GO:0048367	614	587.79	805	9907	13568	1.04459	0.062938	0.0167793	0.420933		enriched	not_significant
GO	Core	GO:0071702	GO:0071702	566	592.901	812	9907	13568	0.954628	-0.06699	0.0164175	0.420933		depleted	not_significant
GO	Core	GO:0005794	GO:0005794	557	584.139	800	9907	13568	0.95354	-0.068635	0.0150878	0.420933		depleted	not_significant
GO	Core	GO:0009891	GO:0009891	479	455.628	624	9907	13568	1.0513	0.072168	0.0163353	0.420933		enriched	not_significant
GO	Core	GO:0010557	GO:0010557	453	430.072	589	9907	13568	1.05331	0.074931	0.0156084	0.420933		enriched	not_significant
GO	Core	GO:0032870	GO:0032870	453	430.072	589	9907	13568	1.05331	0.074931	0.0156084	0.420933		enriched	not_significant
GO	Core	GO:0045893	GO:0045893	383	362.166	496	9907	13568	1.05753	0.080692	0.0168798	0.420933		enriched	not_significant
GO	Core	GO:0098791	GO:0098791	238	256.291	351	9907	13568	0.928632	-0.106822	0.01625	0.420933		depleted	not_significant
GO	Core	GO:0050832	GO:0050832	216	200.068	274	9907	13568	1.07963	0.110543	0.0152938	0.420933		enriched	not_significant
GO	Core	GO:0009735	GO:0009735	191	175.972	241	9907	13568	1.0854	0.118227	0.014952	0.420933		enriched	not_significant
GO	Core	GO:0009657	GO:0009657	185	201.528	276	9907	13568	0.917987	-0.123455	0.0153122	0.420933		depleted	not_significant
GO	Core	GO:0072594	GO:0072594	159	174.512	239	9907	13568	0.911114	-0.134296	0.0149942	0.420933		depleted	not_significant
GO	Core	GO:0031225	GO:0031225	119	107.336	147	9907	13568	1.10867	0.148833	0.0160862	0.420933		enriched	not_significant
GO	Core	GO:0043492	GO:0043492	93	105.145	144	9907	13568	0.884492	-0.177078	0.0156946	0.420933		depleted	not_significant
GO	Core	GO:0005635	GO:0005635	84	95.6528	131	9907	13568	0.878176	-0.187418	0.0154729	0.420933		depleted	not_significant
GO	Core	GO:0002684	GO:0002684	62	72.2872	99	9907	13568	0.85769	-0.221472	0.0150453	0.420933		depleted	not_significant
GO	Core	GO:0030029	GO:0030029	62	72.2872	99	9907	13568	0.85769	-0.221472	0.0150453	0.420933		depleted	not_significant
GO	Core	GO:0050662	GO:0050662	62	72.2872	99	9907	13568	0.85769	-0.221472	0.0150453	0.420933		depleted	not_significant
GO	Core	GO:0044272	GO:0044272	54	63.5251	87	9907	13568	0.850057	-0.234368	0.0165498	0.420933		depleted	not_significant
GO	Core	GO:0060627	GO:0060627	52	61.3346	84	9907	13568	0.847808	-0.23819	0.0169159	0.420933		depleted	not_significant
GO	Core	GO:0051604	GO:0051604	39	47.4613	65	9907	13568	0.821722	-0.283278	0.0152277	0.420933		depleted	not_significant
GO	Core	GO:0006935	GO:0006935	37	45.2708	62	9907	13568	0.817304	-0.291055	0.0153312	0.420933		depleted	not_significant
GO	Core	GO:0016573	GO:0016573	37	45.2708	62	9907	13568	0.817304	-0.291055	0.0153312	0.420933		depleted	not_significant
GO	Core	GO:0045491	GO:0045491	37	30.6673	42	9907	13568	1.2065	0.270824	0.0157842	0.420933		enriched	not_significant
GO	Core	GO:0009749	GO:0009749	35	43.0803	59	9907	13568	0.812437	-0.299672	0.0153922	0.420933		depleted	not_significant
GO	Core	GO:0032392	GO:0032392	31	38.6992	53	9907	13568	0.80105	-0.320036	0.0153567	0.420933		depleted	not_significant
GO	Core	GO:0070646	GO:0070646	31	38.6992	53	9907	13568	0.80105	-0.320036	0.0153567	0.420933		depleted	not_significant
GO	Core	GO:0045597	GO:0045597	27	34.3182	47	9907	13568	0.786755	-0.346013	0.0150495	0.420933		depleted	not_significant
GO	Core	GO:0030687	GO:0030687	24	18.9845	26	9907	13568	1.26419	0.338211	0.0153937	0.420933		enriched	not_significant
GO	Core	GO:0016628	GO:0016628	16	21.9052	30	9907	13568	0.73042	-0.453203	0.0162323	0.420933		depleted	not_significant
GO	Core	GO:0034661	GO:0034661	14	19.7147	27	9907	13568	0.71013	-0.493845	0.0150197	0.420933		depleted	not_significant
GO	Core	GO:2000379	GO:2000379	14	19.7147	27	9907	13568	0.71013	-0.493845	0.0150197	0.420933		depleted	not_significant
GO	Core	GO:0006335	GO:0006335	13	9.4923	13	9907	13568	1.36954	0.453688	0.0167347	0.420933		enriched	not_significant
GO	Core	GO:0034723	GO:0034723	13	9.4923	13	9907	13568	1.36954	0.453688	0.0167347	0.420933		enriched	not_significant
GO	Core	GO:0044126	GO:0044126	13	9.4923	13	9907	13568	1.36954	0.453688	0.0167347	0.420933		enriched	not_significant
GO	Core	GO:0044130	GO:0044130	13	9.4923	13	9907	13568	1.36954	0.453688	0.0167347	0.420933		enriched	not_significant
GO	Core	GO:0044144	GO:0044144	13	9.4923	13	9907	13568	1.36954	0.453688	0.0167347	0.420933		enriched	not_significant
GO	Core	GO:0044146	GO:0044146	13	9.4923	13	9907	13568	1.36954	0.453688	0.0167347	0.420933		enriched	not_significant
GO	Core	GO:1901348	GO:1901348	13	9.4923	13	9907	13568	1.36954	0.453688	0.0167347	0.420933		enriched	not_significant
GO	Core	GO:1903340	GO:1903340	13	9.4923	13	9907	13568	1.36954	0.453688	0.0167347	0.420933		enriched	not_significant
GO	Core	GO:0002764	GO:0002764	9	13.8733	19	9907	13568	0.648728	-0.624315	0.0154825	0.420933		depleted	not_significant
GO	Core	GO:0019905	GO:0019905	9	13.8733	19	9907	13568	0.648728	-0.624315	0.0154825	0.420933		depleted	not_significant
GO	Core	GO:0007029	GO:0007029	6	10.2224	14	9907	13568	0.586944	-0.768705	0.0165569	0.420933		depleted	not_significant
GO	Core	GO:0018195	GO:0018195	6	10.2224	14	9907	13568	0.586944	-0.768705	0.0165569	0.420933		depleted	not_significant
GO	Core	GO:0018216	GO:0018216	6	10.2224	14	9907	13568	0.586944	-0.768705	0.0165569	0.420933		depleted	not_significant
GO	Core	GO:0019344	GO:0019344	6	10.2224	14	9907	13568	0.586944	-0.768705	0.0165569	0.420933		depleted	not_significant
GO	Core	GO:0060321	GO:0060321	6	10.2224	14	9907	13568	0.586944	-0.768705	0.0165569	0.420933		depleted	not_significant
GO	Core	GO:2000035	GO:2000035	6	10.2224	14	9907	13568	0.586944	-0.768705	0.0165569	0.420933		depleted	not_significant
GO	Core	GO:0010093	GO:0010093	18	24.0957	33	9907	13568	0.74702	-0.420781	0.0172009	0.422866		depleted	not_significant
GO	Core	GO:0090701	GO:0090701	18	24.0957	33	9907	13568	0.74702	-0.420781	0.0172009	0.422866		depleted	not_significant
GO	Core	GO:1901616	GO:1901616	18	24.0957	33	9907	13568	0.74702	-0.420781	0.0172009	0.422866		depleted	not_significant
GO	Core	GO:0042445	GO:0042445	151	165.75	227	9907	13568	0.911013	-0.134456	0.0172838	0.423804		depleted	not_significant
GO	Core	GO:0043231	GO:0043231	6042	6095.49	8348	9907	13568	0.991224	-0.012716	0.0174656	0.427892		depleted	not_significant
GO	Core	GO:0031226	GO:0031226	270	252.64	346	9907	13568	1.06871	0.095875	0.0178033	0.433224		enriched	not_significant
GO	Core	GO:0015399	GO:0015399	103	115.368	158	9907	13568	0.892799	-0.163592	0.0179407	0.433224		depleted	not_significant
GO	Core	GO:0015405	GO:0015405	103	115.368	158	9907	13568	0.892799	-0.163592	0.0179407	0.433224		depleted	not_significant
GO	Core	GO:0006611	GO:0006611	46	54.763	75	9907	13568	0.839983	-0.251569	0.0179516	0.433224		depleted	not_significant
GO	Core	GO:0010720	GO:0010720	11	16.0638	22	9907	13568	0.684768	-0.546312	0.0178423	0.433224		depleted	not_significant
GO	Core	GO:0007043	GO:0007043	2	5.1112	7	9907	13568	0.391296	-1.35367	0.0180643	0.433224		depleted	not_significant
GO	Core	GO:0008477	GO:0008477	2	5.1112	7	9907	13568	0.391296	-1.35367	0.0180643	0.433224		depleted	not_significant
GO	Core	GO:0016166	GO:0016166	2	5.1112	7	9907	13568	0.391296	-1.35367	0.0180643	0.433224		depleted	not_significant
GO	Core	GO:0016841	GO:0016841	2	5.1112	7	9907	13568	0.391296	-1.35367	0.0180643	0.433224		depleted	not_significant
GO	Core	GO:0030011	GO:0030011	2	5.1112	7	9907	13568	0.391296	-1.35367	0.0180643	0.433224		depleted	not_significant
GO	Core	GO:0030479	GO:0030479	2	5.1112	7	9907	13568	0.391296	-1.35367	0.0180643	0.433224		depleted	not_significant
GO	Core	GO:0031111	GO:0031111	2	5.1112	7	9907	13568	0.391296	-1.35367	0.0180643	0.433224		depleted	not_significant
GO	Core	GO:0031114	GO:0031114	2	5.1112	7	9907	13568	0.391296	-1.35367	0.0180643	0.433224		depleted	not_significant
GO	Core	GO:0061645	GO:0061645	2	5.1112	7	9907	13568	0.391296	-1.35367	0.0180643	0.433224		depleted	not_significant
GO	Core	GO:0072337	GO:0072337	2	5.1112	7	9907	13568	0.391296	-1.35367	0.0180643	0.433224		depleted	not_significant
GO	Core	GO:1900368	GO:1900368	2	5.1112	7	9907	13568	0.391296	-1.35367	0.0180643	0.433224		depleted	not_significant
GO	Core	GO:1901799	GO:1901799	2	5.1112	7	9907	13568	0.391296	-1.35367	0.0180643	0.433224		depleted	not_significant
GO	Core	GO:1903051	GO:1903051	2	5.1112	7	9907	13568	0.391296	-1.35367	0.0180643	0.433224		depleted	not_significant
GO	Core	GO:1903363	GO:1903363	2	5.1112	7	9907	13568	0.391296	-1.35367	0.0180643	0.433224		depleted	not_significant
GO	Core	GO:1901575	GO:1901575	710	738.936	1012	9907	13568	0.960841	-0.05763	0.0188483	0.438327		depleted	not_significant
GO	Core	GO:0006396	GO:0006396	404	426.422	584	9907	13568	0.947419	-0.077925	0.019301	0.438327		depleted	not_significant
GO	Core	GO:0042742	GO:0042742	318	299.371	410	9907	13568	1.06223	0.087091	0.0188962	0.438327		enriched	not_significant
GO	Core	GO:0016071	GO:0016071	233	250.45	343	9907	13568	0.930327	-0.104191	0.0196372	0.438327		depleted	not_significant
GO	Core	GO:0005198	GO:0005198	229	213.211	292	9907	13568	1.07405	0.103067	0.0191	0.438327		enriched	not_significant
GO	Core	GO:0048527	GO:0048527	114	102.954	141	9907	13568	1.10729	0.147027	0.0195312	0.438327		enriched	not_significant
GO	Core	GO:0071897	GO:0071897	84	74.4777	102	9907	13568	1.12785	0.17358	0.0185368	0.438327		enriched	not_significant
GO	Core	GO:0009644	GO:0009644	77	67.9062	93	9907	13568	1.13392	0.181316	0.0186409	0.438327		enriched	not_significant
GO	Core	GO:0006278	GO:0006278	66	57.6837	79	9907	13568	1.14417	0.194301	0.0197157	0.438327		enriched	not_significant
GO	Core	GO:0042330	GO:0042330	38	46.001	63	9907	13568	0.82607	-0.275664	0.019047	0.438327		depleted	not_significant
GO	Core	GO:0032271	GO:0032271	30	37.2389	51	9907	13568	0.80561	-0.311847	0.0194657	0.438327		depleted	not_significant
GO	Core	GO:0008064	GO:0008064	28	35.0483	48	9907	13568	0.798896	-0.32392	0.0193949	0.438327		depleted	not_significant
GO	Core	GO:0030832	GO:0030832	28	35.0483	48	9907	13568	0.798896	-0.32392	0.0193949	0.438327		depleted	not_significant
GO	Core	GO:0030833	GO:0030833	26	32.8578	45	9907	13568	0.791288	-0.337725	0.0192273	0.438327		depleted	not_significant
GO	Core	GO:0035295	GO:0035295	26	32.8578	45	9907	13568	0.791288	-0.337725	0.0192273	0.438327		depleted	not_significant
GO	Core	GO:0009066	GO:0009066	24	30.6673	42	9907	13568	0.782592	-0.353667	0.0189456	0.438327		depleted	not_significant
GO	Core	GO:1901618	GO:1901618	23	18.2543	25	9907	13568	1.25997	0.333394	0.0196412	0.438327		enriched	not_significant
GO	Core	GO:0044764	GO:0044764	22	28.4768	39	9907	13568	0.772559	-0.372283	0.0185298	0.438327		depleted	not_significant
GO	Core	GO:0060249	GO:0060249	22	28.4768	39	9907	13568	0.772559	-0.372283	0.0185298	0.438327		depleted	not_significant
GO	Core	GO:0005983	GO:0005983	13	18.2543	25	9907	13568	0.712159	-0.489729	0.0197424	0.438327		depleted	not_significant
GO	Core	GO:0006891	GO:0006891	13	18.2543	25	9907	13568	0.712159	-0.489729	0.0197424	0.438327		depleted	not_significant
GO	Core	GO:0040012	GO:0040012	13	18.2543	25	9907	13568	0.712159	-0.489729	0.0197424	0.438327		depleted	not_significant
GO	Core	GO:0000147	GO:0000147	0	2.1905	3	9907	13568	0		0.0196332	0.438327		depleted	not_significant
GO	Core	GO:0000796	GO:0000796	0	2.1905	3	9907	13568	0		0.0196332	0.438327		depleted	not_significant
GO	Core	GO:0002943	GO:0002943	0	2.1905	3	9907	13568	0		0.0196332	0.438327		depleted	not_significant
GO	Core	GO:0004366	GO:0004366	0	2.1905	3	9907	13568	0		0.0196332	0.438327		depleted	not_significant
GO	Core	GO:0004824	GO:0004824	0	2.1905	3	9907	13568	0		0.0196332	0.438327		depleted	not_significant
GO	Core	GO:0006207	GO:0006207	0	2.1905	3	9907	13568	0		0.0196332	0.438327		depleted	not_significant
GO	Core	GO:0006516	GO:0006516	0	2.1905	3	9907	13568	0		0.0196332	0.438327		depleted	not_significant
GO	Core	GO:0006723	GO:0006723	0	2.1905	3	9907	13568	0		0.0196332	0.438327		depleted	not_significant
GO	Core	GO:0008296	GO:0008296	0	2.1905	3	9907	13568	0		0.0196332	0.438327		depleted	not_significant
GO	Core	GO:0010499	GO:0010499	0	2.1905	3	9907	13568	0		0.0196332	0.438327		depleted	not_significant
GO	Core	GO:0015369	GO:0015369	0	2.1905	3	9907	13568	0		0.0196332	0.438327		depleted	not_significant
GO	Core	GO:0017150	GO:0017150	0	2.1905	3	9907	13568	0		0.0196332	0.438327		depleted	not_significant
GO	Core	GO:0032261	GO:0032261	0	2.1905	3	9907	13568	0		0.0196332	0.438327		depleted	not_significant
GO	Core	GO:0032480	GO:0032480	0	2.1905	3	9907	13568	0		0.0196332	0.438327		depleted	not_significant
GO	Core	GO:0034450	GO:0034450	0	2.1905	3	9907	13568	0		0.0196332	0.438327		depleted	not_significant
GO	Core	GO:0036501	GO:0036501	0	2.1905	3	9907	13568	0		0.0196332	0.438327		depleted	not_significant
GO	Core	GO:0039532	GO:0039532	0	2.1905	3	9907	13568	0		0.0196332	0.438327		depleted	not_significant
GO	Core	GO:0039536	GO:0039536	0	2.1905	3	9907	13568	0		0.0196332	0.438327		depleted	not_significant
GO	Core	GO:0043446	GO:0043446	0	2.1905	3	9907	13568	0		0.0196332	0.438327		depleted	not_significant
GO	Core	GO:0043447	GO:0043447	0	2.1905	3	9907	13568	0		0.0196332	0.438327		depleted	not_significant
GO	Core	GO:0043938	GO:0043938	0	2.1905	3	9907	13568	0		0.0196332	0.438327		depleted	not_significant
GO	Core	GO:0044209	GO:0044209	0	2.1905	3	9907	13568	0		0.0196332	0.438327		depleted	not_significant
GO	Core	GO:0044396	GO:0044396	0	2.1905	3	9907	13568	0		0.0196332	0.438327		depleted	not_significant
GO	Core	GO:0045103	GO:0045103	0	2.1905	3	9907	13568	0		0.0196332	0.438327		depleted	not_significant
GO	Core	GO:0045104	GO:0045104	0	2.1905	3	9907	13568	0		0.0196332	0.438327		depleted	not_significant
GO	Core	GO:0045108	GO:0045108	0	2.1905	3	9907	13568	0		0.0196332	0.438327		depleted	not_significant
GO	Core	GO:0048459	GO:0048459	0	2.1905	3	9907	13568	0		0.0196332	0.438327		depleted	not_significant
GO	Core	GO:0048461	GO:0048461	0	2.1905	3	9907	13568	0		0.0196332	0.438327		depleted	not_significant
GO	Core	GO:0048873	GO:0048873	0	2.1905	3	9907	13568	0		0.0196332	0.438327		depleted	not_significant
GO	Core	GO:0050881	GO:0050881	0	2.1905	3	9907	13568	0		0.0196332	0.438327		depleted	not_significant
GO	Core	GO:0051139	GO:0051139	0	2.1905	3	9907	13568	0		0.0196332	0.438327		depleted	not_significant
GO	Core	GO:0052658	GO:0052658	0	2.1905	3	9907	13568	0		0.0196332	0.438327		depleted	not_significant
GO	Core	GO:0060052	GO:0060052	0	2.1905	3	9907	13568	0		0.0196332	0.438327		depleted	not_significant
GO	Core	GO:0071474	GO:0071474	0	2.1905	3	9907	13568	0		0.0196332	0.438327		depleted	not_significant
GO	Core	GO:0080112	GO:0080112	0	2.1905	3	9907	13568	0		0.0196332	0.438327		depleted	not_significant
GO	Core	GO:0098532	GO:0098532	0	2.1905	3	9907	13568	0		0.0196332	0.438327		depleted	not_significant
GO	Core	GO:0140027	GO:0140027	0	2.1905	3	9907	13568	0		0.0196332	0.438327		depleted	not_significant
GO	Core	GO:1902477	GO:1902477	0	2.1905	3	9907	13568	0		0.0196332	0.438327		depleted	not_significant
GO	Core	GO:2001066	GO:2001066	0	2.1905	3	9907	13568	0		0.0196332	0.438327		depleted	not_significant
GO	Core	GO:2001070	GO:2001070	0	2.1905	3	9907	13568	0		0.0196332	0.438327		depleted	not_significant
GO	Core	GO:0031975	GO:0031975	673	700.967	960	9907	13568	0.960102	-0.05874	0.0198683	0.440779		depleted	not_significant
GO	Core	GO:0031967	GO:0031967	671	698.777	957	9907	13568	0.96025	-0.058518	0.0204142	0.441979		depleted	not_significant
GO	Core	GO:0008610	GO:0008610	260	278.196	381	9907	13568	0.934592	-0.097591	0.0203506	0.441979		depleted	not_significant
GO	Core	GO:0016570	GO:0016570	134	147.495	202	9907	13568	0.908505	-0.138434	0.0206179	0.441979		depleted	not_significant
GO	Core	GO:0016741	GO:0016741	134	147.495	202	9907	13568	0.908505	-0.138434	0.0206179	0.441979		depleted	not_significant
GO	Core	GO:0071215	GO:0071215	130	118.288	162	9907	13568	1.09901	0.136206	0.0204998	0.441979		enriched	not_significant
GO	Core	GO:0097306	GO:0097306	130	118.288	162	9907	13568	1.09901	0.136206	0.0204998	0.441979		enriched	not_significant
GO	Core	GO:0008652	GO:0008652	86	97.1131	133	9907	13568	0.885565	-0.17533	0.0205832	0.441979		depleted	not_significant
GO	Core	GO:0010337	GO:0010337	18	13.8733	19	9907	13568	1.29746	0.375685	0.0203239	0.441979		enriched	not_significant
GO	Core	GO:0015866	GO:0015866	18	13.8733	19	9907	13568	1.29746	0.375685	0.0203239	0.441979		enriched	not_significant
GO	Core	GO:0031146	GO:0031146	18	13.8733	19	9907	13568	1.29746	0.375685	0.0203239	0.441979		enriched	not_significant
GO	Core	GO:0048574	GO:0048574	18	13.8733	19	9907	13568	1.29746	0.375685	0.0203239	0.441979		enriched	not_significant
GO	Core	GO:0002757	GO:0002757	8	12.413	17	9907	13568	0.644488	-0.633775	0.0204839	0.441979		depleted	not_significant
GO	Core	GO:0001818	GO:0001818	1	3.6509	5	9907	13568	0.273907	-1.86824	0.0207622	0.441979		depleted	not_significant
GO	Core	GO:0006072	GO:0006072	1	3.6509	5	9907	13568	0.273907	-1.86824	0.0207622	0.441979		depleted	not_significant
GO	Core	GO:0006692	GO:0006692	1	3.6509	5	9907	13568	0.273907	-1.86824	0.0207622	0.441979		depleted	not_significant
GO	Core	GO:0006693	GO:0006693	1	3.6509	5	9907	13568	0.273907	-1.86824	0.0207622	0.441979		depleted	not_significant
GO	Core	GO:0007026	GO:0007026	1	3.6509	5	9907	13568	0.273907	-1.86824	0.0207622	0.441979		depleted	not_significant
GO	Core	GO:0015083	GO:0015083	1	3.6509	5	9907	13568	0.273907	-1.86824	0.0207622	0.441979		depleted	not_significant
GO	Core	GO:0019776	GO:0019776	1	3.6509	5	9907	13568	0.273907	-1.86824	0.0207622	0.441979		depleted	not_significant
GO	Core	GO:0021953	GO:0021953	1	3.6509	5	9907	13568	0.273907	-1.86824	0.0207622	0.441979		depleted	not_significant
GO	Core	GO:0030038	GO:0030038	1	3.6509	5	9907	13568	0.273907	-1.86824	0.0207622	0.441979		depleted	not_significant
GO	Core	GO:0030242	GO:0030242	1	3.6509	5	9907	13568	0.273907	-1.86824	0.0207622	0.441979		depleted	not_significant
GO	Core	GO:0031270	GO:0031270	1	3.6509	5	9907	13568	0.273907	-1.86824	0.0207622	0.441979		depleted	not_significant
GO	Core	GO:0032060	GO:0032060	1	3.6509	5	9907	13568	0.273907	-1.86824	0.0207622	0.441979		depleted	not_significant
GO	Core	GO:0032982	GO:0032982	1	3.6509	5	9907	13568	0.273907	-1.86824	0.0207622	0.441979		depleted	not_significant
GO	Core	GO:0033298	GO:0033298	1	3.6509	5	9907	13568	0.273907	-1.86824	0.0207622	0.441979		depleted	not_significant
GO	Core	GO:0034271	GO:0034271	1	3.6509	5	9907	13568	0.273907	-1.86824	0.0207622	0.441979		depleted	not_significant
GO	Core	GO:0034272	GO:0034272	1	3.6509	5	9907	13568	0.273907	-1.86824	0.0207622	0.441979		depleted	not_significant
GO	Core	GO:0035461	GO:0035461	1	3.6509	5	9907	13568	0.273907	-1.86824	0.0207622	0.441979		depleted	not_significant
GO	Core	GO:0045179	GO:0045179	1	3.6509	5	9907	13568	0.273907	-1.86824	0.0207622	0.441979		depleted	not_significant
GO	Core	GO:0046524	GO:0046524	1	3.6509	5	9907	13568	0.273907	-1.86824	0.0207622	0.441979		depleted	not_significant
GO	Core	GO:0046847	GO:0046847	1	3.6509	5	9907	13568	0.273907	-1.86824	0.0207622	0.441979		depleted	not_significant
GO	Core	GO:0051180	GO:0051180	1	3.6509	5	9907	13568	0.273907	-1.86824	0.0207622	0.441979		depleted	not_significant
GO	Core	GO:0051591	GO:0051591	1	3.6509	5	9907	13568	0.273907	-1.86824	0.0207622	0.441979		depleted	not_significant
GO	Core	GO:0052646	GO:0052646	1	3.6509	5	9907	13568	0.273907	-1.86824	0.0207622	0.441979		depleted	not_significant
GO	Core	GO:0060327	GO:0060327	1	3.6509	5	9907	13568	0.273907	-1.86824	0.0207622	0.441979		depleted	not_significant
GO	Core	GO:0060328	GO:0060328	1	3.6509	5	9907	13568	0.273907	-1.86824	0.0207622	0.441979		depleted	not_significant
GO	Core	GO:0070273	GO:0070273	1	3.6509	5	9907	13568	0.273907	-1.86824	0.0207622	0.441979		depleted	not_significant
GO	Core	GO:0071889	GO:0071889	1	3.6509	5	9907	13568	0.273907	-1.86824	0.0207622	0.441979		depleted	not_significant
GO	Core	GO:0080183	GO:0080183	1	3.6509	5	9907	13568	0.273907	-1.86824	0.0207622	0.441979		depleted	not_significant
GO	Core	GO:0090482	GO:0090482	1	3.6509	5	9907	13568	0.273907	-1.86824	0.0207622	0.441979		depleted	not_significant
GO	Core	GO:0097204	GO:0097204	1	3.6509	5	9907	13568	0.273907	-1.86824	0.0207622	0.441979		depleted	not_significant
GO	Core	GO:1902602	GO:1902602	1	3.6509	5	9907	13568	0.273907	-1.86824	0.0207622	0.441979		depleted	not_significant
GO	Core	GO:2001222	GO:2001222	1	3.6509	5	9907	13568	0.273907	-1.86824	0.0207622	0.441979		depleted	not_significant
GO	Core	GO:0010628	GO:0010628	457	435.184	596	9907	13568	1.05013	0.07057	0.0209913	0.445692		enriched	not_significant
GO	Core	GO:0007417	GO:0007417	15	20.4449	28	9907	13568	0.73368	-0.446776	0.0212409	0.448139		depleted	not_significant
GO	Core	GO:0015693	GO:0015693	15	20.4449	28	9907	13568	0.73368	-0.446776	0.0212409	0.448139		depleted	not_significant
GO	Core	GO:0016787	GO:0016787	1489	1527.52	2092	9907	13568	0.97478	-0.036851	0.0212844	0.448725		depleted	not_significant
GO	Core	GO:0010101	GO:0010101	76	67.176	92	9907	13568	1.13136	0.178053	0.0214166	0.449783		enriched	not_significant
GO	Core	GO:0005996	GO:0005996	62	71.557	98	9907	13568	0.866442	-0.206826	0.0215871	0.451003		depleted	not_significant
GO	Core	GO:0043094	GO:0043094	47	55.4932	76	9907	13568	0.84695	-0.239651	0.0217179	0.453159		depleted	not_significant
GO	Core	GO:0006491	GO:0006491	5	8.7621	12	9907	13568	0.57064	-0.809346	0.0217478	0.453449		depleted	not_significant
GO	Core	GO:0044434	GO:0044434	815	844.811	1157	9907	13568	0.964713	-0.051829	0.0218547	0.453497		depleted	not_significant
GO	Core	GO:0044271	GO:0044271	751	723.602	991	9907	13568	1.03786	0.053616	0.0219571	0.453497		enriched	not_significant
GO	Core	GO:0048579	GO:0048579	27	21.9052	30	9907	13568	1.23258	0.301685	0.0219866	0.453766		enriched	not_significant
GO	Core	GO:0005759	GO:0005759	60	69.3665	95	9907	13568	0.864971	-0.209277	0.0222119	0.456681		depleted	not_significant
GO	Core	GO:0008757	GO:0008757	107	119.018	163	9907	13568	0.899021	-0.153573	0.0222954	0.457153		depleted	not_significant
GO	Core	GO:0004003	GO:0004003	17	22.6354	31	9907	13568	0.751036	-0.413046	0.0223962	0.458889		depleted	not_significant
GO	Core	GO:0065003	GO:0065003	352	372.389	510	9907	13568	0.945249	-0.081234	0.0226417	0.462252		depleted	not_significant
GO	Core	GO:0046486	GO:0046486	98	109.526	150	9907	13568	0.894764	-0.160421	0.0226394	0.462252		depleted	not_significant
GO	Core	GO:0019843	GO:0019843	43	36.5087	50	9907	13568	1.1778	0.236096	0.0227381	0.463887		enriched	not_significant
GO	Core	GO:0019898	GO:0019898	58	67.176	92	9907	13568	0.863404	-0.211893	0.0228451	0.465056		depleted	not_significant
GO	Core	GO:0004650	GO:0004650	12	8.7621	12	9907	13568	1.36954	0.453688	0.0229263	0.465056		enriched	not_significant
GO	Core	GO:0006490	GO:0006490	12	8.7621	12	9907	13568	1.36954	0.453688	0.0229263	0.465056		enriched	not_significant
GO	Core	GO:0016210	GO:0016210	12	8.7621	12	9907	13568	1.36954	0.453688	0.0229263	0.465056		enriched	not_significant
GO	Core	GO:0048829	GO:0048829	12	8.7621	12	9907	13568	1.36954	0.453688	0.0229263	0.465056		enriched	not_significant
GO	Core	GO:0048830	GO:0048830	12	8.7621	12	9907	13568	1.36954	0.453688	0.0229263	0.465056		enriched	not_significant
GO	Core	GO:1902347	GO:1902347	12	8.7621	12	9907	13568	1.36954	0.453688	0.0229263	0.465056		enriched	not_significant
GO	Core	GO:0016569	GO:0016569	135	148.225	203	9907	13568	0.910776	-0.134832	0.0230127	0.46581		depleted	not_significant
GO	Core	GO:0035239	GO:0035239	19	24.8259	34	9907	13568	0.765329	-0.385847	0.0232619	0.469516		depleted	not_significant
GO	Core	GO:0061659	GO:0061659	183	169.4	232	9907	13568	1.08028	0.111407	0.0232943	0.469837		enriched	not_significant
GO	Core	GO:0044430	GO:0044430	223	239.497	328	9907	13568	0.931118	-0.102964	0.0233405	0.470398		depleted	not_significant
GO	Core	GO:0009739	GO:0009739	119	108.066	148	9907	13568	1.10118	0.139052	0.0233552	0.470398		enriched	not_significant
GO	Core	GO:0031328	GO:0031328	464	442.485	606	9907	13568	1.04862	0.068495	0.0234037	0.471042		enriched	not_significant
GO	Core	GO:0045935	GO:0045935	455	433.723	594	9907	13568	1.04906	0.069092	0.0235971	0.473323		enriched	not_significant
GO	Core	GO:0000145	GO:0000145	10	14.6035	20	9907	13568	0.684768	-0.546312	0.0236003	0.473323		depleted	not_significant
GO	Core	GO:0030048	GO:0030048	10	14.6035	20	9907	13568	0.684768	-0.546312	0.0236003	0.473323		depleted	not_significant
GO	Core	GO:0030137	GO:0030137	10	14.6035	20	9907	13568	0.684768	-0.546312	0.0236003	0.473323		depleted	not_significant
GO	Core	GO:0009639	GO:0009639	148	135.812	186	9907	13568	1.08974	0.123982	0.0236176	0.473334		enriched	not_significant
GO	Core	GO:0044275	GO:0044275	37	44.5406	61	9907	13568	0.830703	-0.267596	0.0237884	0.473973		depleted	not_significant
GO	Core	GO:0060968	GO:0060968	37	44.5406	61	9907	13568	0.830703	-0.267596	0.0237884	0.473973		depleted	not_significant
GO	Core	GO:0008422	GO:0008422	21	27.0164	37	9907	13568	0.777305	-0.363448	0.0238843	0.473973		depleted	not_significant
GO	Core	GO:0030100	GO:0030100	21	27.0164	37	9907	13568	0.777305	-0.363448	0.0238843	0.473973		depleted	not_significant
GO	Core	GO:0030182	GO:0030182	21	27.0164	37	9907	13568	0.777305	-0.363448	0.0238843	0.473973		depleted	not_significant
GO	Core	GO:0000166	GO:0000166	209	224.894	308	9907	13568	0.929328	-0.105739	0.0242272	0.477802		depleted	not_significant
GO	Core	GO:1901265	GO:1901265	209	224.894	308	9907	13568	0.929328	-0.105739	0.0242272	0.477802		depleted	not_significant
GO	Core	GO:0051053	GO:0051053	23	29.207	40	9907	13568	0.787484	-0.344678	0.0243033	0.478639		depleted	not_significant
GO	Core	GO:0070603	GO:0070603	23	29.207	40	9907	13568	0.787484	-0.344678	0.0243033	0.478639		depleted	not_significant
GO	Core	GO:0046873	GO:0046873	117	129.241	177	9907	13568	0.905287	-0.143553	0.0245291	0.481681		depleted	not_significant
GO	Core	GO:0010102	GO:0010102	75	66.4458	91	9907	13568	1.12874	0.174712	0.0245595	0.481681		enriched	not_significant
GO	Core	GO:0008237	GO:0008237	31	37.969	52	9907	13568	0.816455	-0.292555	0.0245427	0.481681		depleted	not_significant
GO	Core	GO:0015926	GO:0015926	29	35.7785	49	9907	13568	0.810542	-0.303041	0.0246504	0.481995		depleted	not_significant
GO	Core	GO:0110053	GO:0110053	29	35.7785	49	9907	13568	0.810542	-0.303041	0.0246504	0.481995		depleted	not_significant
GO	Core	GO:0045454	GO:0045454	27	33.588	46	9907	13568	0.803858	-0.314987	0.0246603	0.481995		depleted	not_significant
GO	Core	GO:0006260	GO:0006260	83	93.4623	128	9907	13568	0.888059	-0.171273	0.0252735	0.490631		depleted	not_significant
GO	Core	GO:0048653	GO:0048653	57	49.6518	68	9907	13568	1.14799	0.199115	0.0259991	0.499547		enriched	not_significant
GO	Core	GO:0030334	GO:0030334	12	16.794	23	9907	13568	0.714541	-0.484912	0.0260153	0.499547		depleted	not_significant
GO	Core	GO:2000145	GO:2000145	12	16.794	23	9907	13568	0.714541	-0.484912	0.0260153	0.499547		depleted	not_significant
GO	Core	GO:0043933	GO:0043933	394	414.739	568	9907	13568	0.949996	-0.074007	0.026383	0.504561		depleted	not_significant
GO	Core	GO:0006897	GO:0006897	46	54.0329	74	9907	13568	0.851334	-0.232203	0.0267175	0.50993		depleted	not_significant
GO	Core	GO:0007049	GO:0007049	315	333.69	457	9907	13568	0.943991	-0.083154	0.026781	0.510797		depleted	not_significant
GO	Core	GO:0098805	GO:0098805	545	568.806	779	9907	13568	0.958148	-0.061679	0.027234	0.513286		depleted	not_significant
GO	Core	GO:0005618	GO:0005618	423	403.056	552	9907	13568	1.04948	0.069677	0.027222	0.513286		enriched	not_significant
GO	Core	GO:0030312	GO:0030312	423	403.056	552	9907	13568	1.04948	0.069677	0.027222	0.513286		enriched	not_significant
GO	Core	GO:0000428	GO:0000428	68	77.3984	106	9907	13568	0.878571	-0.18677	0.027701	0.513286		depleted	not_significant
GO	Core	GO:0030880	GO:0030880	68	77.3984	106	9907	13568	0.878571	-0.18677	0.027701	0.513286		depleted	not_significant
GO	Core	GO:0045860	GO:0045860	44	51.8423	71	9907	13568	0.848727	-0.236628	0.0273492	0.513286		depleted	not_significant
GO	Core	GO:0006749	GO:0006749	42	35.7785	49	9907	13568	1.17389	0.231295	0.0271509	0.513286		enriched	not_significant
GO	Core	GO:0019318	GO:0019318	42	49.6518	68	9907	13568	0.84589	-0.241458	0.027966	0.513286		depleted	not_significant
GO	Core	GO:0003714	GO:0003714	26	21.175	29	9907	13568	1.22786	0.296147	0.027421	0.513286		enriched	not_significant
GO	Core	GO:0043903	GO:0043903	26	21.175	29	9907	13568	1.22786	0.296147	0.027421	0.513286		enriched	not_significant
GO	Core	GO:0009934	GO:0009934	14	18.9845	26	9907	13568	0.737443	-0.439397	0.0278452	0.513286		depleted	not_significant
GO	Core	GO:0016903	GO:0016903	14	18.9845	26	9907	13568	0.737443	-0.439397	0.0278452	0.513286		depleted	not_significant
GO	Core	GO:0032040	GO:0032040	14	18.9845	26	9907	13568	0.737443	-0.439397	0.0278452	0.513286		depleted	not_significant
GO	Core	GO:0042593	GO:0042593	14	18.9845	26	9907	13568	0.737443	-0.439397	0.0278452	0.513286		depleted	not_significant
GO	Core	GO:0015298	GO:0015298	7	10.9526	15	9907	13568	0.639117	-0.645848	0.0272062	0.513286		depleted	not_significant
GO	Core	GO:0016559	GO:0016559	7	10.9526	15	9907	13568	0.639117	-0.645848	0.0272062	0.513286		depleted	not_significant
GO	Core	GO:0031023	GO:0031023	7	10.9526	15	9907	13568	0.639117	-0.645848	0.0272062	0.513286		depleted	not_significant
GO	Core	GO:0035510	GO:0035510	7	10.9526	15	9907	13568	0.639117	-0.645848	0.0272062	0.513286		depleted	not_significant
GO	Core	GO:0048544	GO:0048544	7	10.9526	15	9907	13568	0.639117	-0.645848	0.0272062	0.513286		depleted	not_significant
GO	Core	GO:0071396	GO:0071396	221	206.639	283	9907	13568	1.0695	0.096932	0.0284483	0.51447		enriched	not_significant
GO	Core	GO:0018022	GO:0018022	40	47.4613	65	9907	13568	0.842792	-0.246752	0.0285619	0.51447		depleted	not_significant
GO	Core	GO:0007187	GO:0007187	4	7.3017	10	9907	13568	0.547815	-0.86824	0.0285847	0.51447		depleted	not_significant
GO	Core	GO:0007188	GO:0007188	4	7.3017	10	9907	13568	0.547815	-0.86824	0.0285847	0.51447		depleted	not_significant
GO	Core	GO:0008469	GO:0008469	4	7.3017	10	9907	13568	0.547815	-0.86824	0.0285847	0.51447		depleted	not_significant
GO	Core	GO:0030665	GO:0030665	4	7.3017	10	9907	13568	0.547815	-0.86824	0.0285847	0.51447		depleted	not_significant
GO	Core	GO:0031297	GO:0031297	4	7.3017	10	9907	13568	0.547815	-0.86824	0.0285847	0.51447		depleted	not_significant
GO	Core	GO:0035247	GO:0035247	4	7.3017	10	9907	13568	0.547815	-0.86824	0.0285847	0.51447		depleted	not_significant
GO	Core	GO:0042575	GO:0042575	4	7.3017	10	9907	13568	0.547815	-0.86824	0.0285847	0.51447		depleted	not_significant
GO	Core	GO:0043162	GO:0043162	4	7.3017	10	9907	13568	0.547815	-0.86824	0.0285847	0.51447		depleted	not_significant
GO	Core	GO:0046683	GO:0046683	4	7.3017	10	9907	13568	0.547815	-0.86824	0.0285847	0.51447		depleted	not_significant
GO	Core	GO:0046838	GO:0046838	4	7.3017	10	9907	13568	0.547815	-0.86824	0.0285847	0.51447		depleted	not_significant
GO	Core	GO:0010105	GO:0010105	16	21.175	29	9907	13568	0.755606	-0.404293	0.0291946	0.520503		depleted	not_significant
GO	Core	GO:0070298	GO:0070298	16	21.175	29	9907	13568	0.755606	-0.404293	0.0291946	0.520503		depleted	not_significant
GO	Core	GO:0031503	GO:0031503	53	61.3346	84	9907	13568	0.864112	-0.210709	0.0293787	0.521821		depleted	not_significant
GO	Core	GO:0015630	GO:0015630	185	199.338	273	9907	13568	0.928074	-0.107688	0.029907	0.525046		depleted	not_significant
GO	Core	GO:0051129	GO:0051129	82	92.0019	126	9907	13568	0.891286	-0.16604	0.0299486	0.525046		depleted	not_significant
GO	Core	GO:0015631	GO:0015631	73	82.5097	113	9907	13568	0.884745	-0.176666	0.0299668	0.525046		depleted	not_significant
GO	Core	GO:0034968	GO:0034968	36	43.0803	59	9907	13568	0.83565	-0.25903	0.0296612	0.525046		depleted	not_significant
GO	Core	GO:0032272	GO:0032272	18	23.3656	32	9907	13568	0.770364	-0.376387	0.0301519	0.527639		depleted	not_significant
GO	Core	GO:0044877	GO:0044877	166	179.623	246	9907	13568	0.924159	-0.113787	0.0302368	0.528799		depleted	not_significant
GO	Core	GO:0001228	GO:0001228	56	48.9217	67	9907	13568	1.14469	0.194954	0.0302784	0.529201		enriched	not_significant
GO	Core	GO:0042626	GO:0042626	89	99.3037	136	9907	13568	0.896241	-0.158041	0.0306904	0.53184		depleted	not_significant
GO	Core	GO:0032535	GO:0032535	62	70.8269	97	9907	13568	0.875374	-0.192029	0.0305142	0.53184		depleted	not_significant
GO	Core	GO:0031248	GO:0031248	20	25.5561	35	9907	13568	0.782592	-0.353667	0.0307897	0.531923		depleted	not_significant
GO	Core	GO:1902493	GO:1902493	20	25.5561	35	9907	13568	0.782592	-0.353667	0.0307897	0.531923		depleted	not_significant
GO	Core	GO:0090693	GO:0090693	100	90.5416	124	9907	13568	1.10447	0.143348	0.0312227	0.532248		enriched	not_significant
GO	Core	GO:0016877	GO:0016877	26	32.1277	44	9907	13568	0.809272	-0.305304	0.0313278	0.532248		depleted	not_significant
GO	Core	GO:1904949	GO:1904949	26	32.1277	44	9907	13568	0.809272	-0.305304	0.0313278	0.532248		depleted	not_significant
GO	Core	GO:0003678	GO:0003678	22	27.7466	38	9907	13568	0.79289	-0.334808	0.0311675	0.532248		depleted	not_significant
GO	Core	GO:0009069	GO:0009069	22	27.7466	38	9907	13568	0.79289	-0.334808	0.0311675	0.532248		depleted	not_significant
GO	Core	GO:0000788	GO:0000788	11	8.0319	11	9907	13568	1.36954	0.453688	0.0314079	0.532248		enriched	not_significant
GO	Core	GO:0006140	GO:0006140	11	8.0319	11	9907	13568	1.36954	0.453688	0.0314079	0.532248		enriched	not_significant
GO	Core	GO:0010262	GO:0010262	11	8.0319	11	9907	13568	1.36954	0.453688	0.0314079	0.532248		enriched	not_significant
GO	Core	GO:0030808	GO:0030808	11	8.0319	11	9907	13568	1.36954	0.453688	0.0314079	0.532248		enriched	not_significant
GO	Core	GO:0031341	GO:0031341	11	8.0319	11	9907	13568	1.36954	0.453688	0.0314079	0.532248		enriched	not_significant
GO	Core	GO:0031343	GO:0031343	11	8.0319	11	9907	13568	1.36954	0.453688	0.0314079	0.532248		enriched	not_significant
GO	Core	GO:0042268	GO:0042268	11	8.0319	11	9907	13568	1.36954	0.453688	0.0314079	0.532248		enriched	not_significant
GO	Core	GO:0045919	GO:0045919	11	8.0319	11	9907	13568	1.36954	0.453688	0.0314079	0.532248		enriched	not_significant
GO	Core	GO:0051709	GO:0051709	11	8.0319	11	9907	13568	1.36954	0.453688	0.0314079	0.532248		enriched	not_significant
GO	Core	GO:0051710	GO:0051710	11	8.0319	11	9907	13568	1.36954	0.453688	0.0314079	0.532248		enriched	not_significant
GO	Core	GO:0051712	GO:0051712	11	8.0319	11	9907	13568	1.36954	0.453688	0.0314079	0.532248		enriched	not_significant
GO	Core	GO:0051714	GO:0051714	11	8.0319	11	9907	13568	1.36954	0.453688	0.0314079	0.532248		enriched	not_significant
GO	Core	GO:0051802	GO:0051802	11	8.0319	11	9907	13568	1.36954	0.453688	0.0314079	0.532248		enriched	not_significant
GO	Core	GO:0051804	GO:0051804	11	8.0319	11	9907	13568	1.36954	0.453688	0.0314079	0.532248		enriched	not_significant
GO	Core	GO:0051839	GO:0051839	11	8.0319	11	9907	13568	1.36954	0.453688	0.0314079	0.532248		enriched	not_significant
GO	Core	GO:0051841	GO:0051841	11	8.0319	11	9907	13568	1.36954	0.453688	0.0314079	0.532248		enriched	not_significant
GO	Core	GO:1900371	GO:1900371	11	8.0319	11	9907	13568	1.36954	0.453688	0.0314079	0.532248		enriched	not_significant
GO	Core	GO:1900542	GO:1900542	11	8.0319	11	9907	13568	1.36954	0.453688	0.0314079	0.532248		enriched	not_significant
GO	Core	GO:1901959	GO:1901959	11	8.0319	11	9907	13568	1.36954	0.453688	0.0314079	0.532248		enriched	not_significant
GO	Core	GO:0003954	GO:0003954	9	13.1431	18	9907	13568	0.684768	-0.546312	0.0313337	0.532248		depleted	not_significant
GO	Core	GO:0016075	GO:0016075	9	13.1431	18	9907	13568	0.684768	-0.546312	0.0313337	0.532248		depleted	not_significant
GO	Core	GO:0031346	GO:0031346	9	13.1431	18	9907	13568	0.684768	-0.546312	0.0313337	0.532248		depleted	not_significant
GO	Core	GO:0031593	GO:0031593	9	13.1431	18	9907	13568	0.684768	-0.546312	0.0313337	0.532248		depleted	not_significant
GO	Core	GO:0031624	GO:0031624	9	13.1431	18	9907	13568	0.684768	-0.546312	0.0313337	0.532248		depleted	not_significant
GO	Core	GO:0043170	GO:0043170	3136	3181.37	4357	9907	13568	0.98574	-0.020722	0.0317323	0.535832		depleted	not_significant
GO	Core	GO:0010143	GO:0010143	21	16.794	23	9907	13568	1.25045	0.322443	0.0317185	0.535832		enriched	not_significant
GO	Core	GO:0012501	GO:0012501	87	97.1131	133	9907	13568	0.895862	-0.158651	0.0318053	0.536424		depleted	not_significant
GO	Core	GO:0033674	GO:0033674	47	54.763	75	9907	13568	0.858243	-0.220542	0.0319398	0.538373		depleted	not_significant
GO	Core	GO:0033043	GO:0033043	193	207.369	284	9907	13568	0.930706	-0.103602	0.0320508	0.539605		depleted	not_significant
GO	Core	GO:1901360	GO:1901360	1866	1904.29	2608	9907	13568	0.979891	-0.029307	0.0321845	0.54148		depleted	not_significant
GO	Core	GO:0006139	GO:0006139	1551	1586.67	2173	9907	13568	0.97752	-0.032802	0.0322869	0.54148		depleted	not_significant
GO	Core	GO:2000022	GO:2000022	41	35.0483	48	9907	13568	1.16981	0.226277	0.0323337	0.54148		enriched	not_significant
GO	Core	GO:0006397	GO:0006397	136	148.225	203	9907	13568	0.917522	-0.124185	0.0327317	0.545893		depleted	not_significant
GO	Core	GO:0009640	GO:0009640	59	51.8423	71	9907	13568	1.13807	0.186584	0.0328042	0.546471		enriched	not_significant
GO	Core	GO:0006720	GO:0006720	108	119.018	163	9907	13568	0.907423	-0.140153	0.032984	0.54785		depleted	not_significant
GO	Core	GO:0061640	GO:0061640	85	94.9226	130	9907	13568	0.895466	-0.159289	0.0329619	0.54785		depleted	not_significant
GO	Core	GO:0061630	GO:0061630	179	166.48	228	9907	13568	1.07521	0.104614	0.0330665	0.54858		enriched	not_significant
GO	Core	GO:0006955	GO:0006955	220	235.116	322	9907	13568	0.935708	-0.095869	0.0331307	0.549003		depleted	not_significant
GO	Core	GO:0016757	GO:0016757	220	235.116	322	9907	13568	0.935708	-0.095869	0.0331307	0.549003		depleted	not_significant
GO	Core	GO:0005215	GO:0005215	651	675.411	925	9907	13568	0.963858	-0.053108	0.034113	0.559087		depleted	not_significant
GO	Core	GO:0008168	GO:0008168	127	138.733	190	9907	13568	0.915427	-0.127483	0.0341588	0.559121		depleted	not_significant
GO	Core	GO:0090066	GO:0090066	65	73.7476	101	9907	13568	0.881385	-0.182156	0.0343032	0.559121		depleted	not_significant
GO	Core	GO:0006661	GO:0006661	11	15.3337	21	9907	13568	0.717376	-0.479198	0.0343825	0.559121		depleted	not_significant
GO	Core	GO:0007041	GO:0007041	11	15.3337	21	9907	13568	0.717376	-0.479198	0.0343825	0.559121		depleted	not_significant
GO	Core	GO:0007420	GO:0007420	11	15.3337	21	9907	13568	0.717376	-0.479198	0.0343825	0.559121		depleted	not_significant
GO	Core	GO:0043647	GO:0043647	11	15.3337	21	9907	13568	0.717376	-0.479198	0.0343825	0.559121		depleted	not_significant
GO	Core	GO:0048439	GO:0048439	11	15.3337	21	9907	13568	0.717376	-0.479198	0.0343825	0.559121		depleted	not_significant
GO	Core	GO:0060322	GO:0060322	11	15.3337	21	9907	13568	0.717376	-0.479198	0.0343825	0.559121		depleted	not_significant
GO	Core	GO:0016168	GO:0016168	16	12.413	17	9907	13568	1.28898	0.366225	0.0346339	0.561152		enriched	not_significant
GO	Core	GO:0000470	GO:0000470	29	24.0957	33	9907	13568	1.20353	0.267275	0.0348107	0.563054		enriched	not_significant
GO	Core	GO:0042562	GO:0042562	29	24.0957	33	9907	13568	1.20353	0.267275	0.0348107	0.563054		enriched	not_significant
GO	Core	GO:0005856	GO:0005856	272	288.419	395	9907	13568	0.943073	-0.084558	0.0348799	0.563292		depleted	not_significant
GO	Core	GO:0046658	GO:0046658	99	89.8114	123	9907	13568	1.10231	0.14053	0.0349711	0.564043		enriched	not_significant
GO	Core	GO:0048573	GO:0048573	55	48.1915	66	9907	13568	1.14128	0.190654	0.0351798	0.566766		enriched	not_significant
GO	Core	GO:0051347	GO:0051347	63	71.557	98	9907	13568	0.880416	-0.183742	0.0354737	0.569242		depleted	not_significant
GO	Core	GO:0071495	GO:0071495	474	454.168	622	9907	13568	1.04367	0.06166	0.0356929	0.571791		enriched	not_significant
GO	Core	GO:0051254	GO:0051254	421	402.326	551	9907	13568	1.04642	0.065456	0.036162	0.577678		enriched	not_significant
GO	Core	GO:0004407	GO:0004407	6	9.4923	13	9907	13568	0.632094	-0.661789	0.0363079	0.578059		depleted	not_significant
GO	Core	GO:0034969	GO:0034969	6	9.4923	13	9907	13568	0.632094	-0.661789	0.0363079	0.578059		depleted	not_significant
GO	Core	GO:0045335	GO:0045335	6	9.4923	13	9907	13568	0.632094	-0.661789	0.0363079	0.578059		depleted	not_significant
GO	Core	GO:0070491	GO:0070491	6	9.4923	13	9907	13568	0.632094	-0.661789	0.0363079	0.578059		depleted	not_significant
GO	Core	GO:2000279	GO:2000279	6	9.4923	13	9907	13568	0.632094	-0.661789	0.0363079	0.578059		depleted	not_significant
GO	Core	GO:0009856	GO:0009856	130	141.654	194	9907	13568	0.917731	-0.123857	0.036522	0.580816		depleted	not_significant
GO	Core	GO:0044706	GO:0044706	130	141.654	194	9907	13568	0.917731	-0.123857	0.036522	0.580816		depleted	not_significant
GO	Core	GO:0005730	GO:0005730	372	390.643	535	9907	13568	0.952276	-0.070548	0.0368529	0.585097		depleted	not_significant
GO	Core	GO:0007031	GO:0007031	35	41.6199	57	9907	13568	0.840944	-0.249919	0.0369166	0.585126		depleted	not_significant
GO	Core	GO:0030659	GO:0030659	35	41.6199	57	9907	13568	0.840944	-0.249919	0.0369166	0.585126		depleted	not_significant
GO	Core	GO:0009733	GO:0009733	278	262.863	360	9907	13568	1.05759	0.080776	0.0373878	0.588665		enriched	not_significant
GO	Core	GO:0006974	GO:0006974	224	238.767	327	9907	13568	0.938154	-0.092104	0.0374892	0.588665		depleted	not_significant
GO	Core	GO:0004611	GO:0004611	3	5.8414	8	9907	13568	0.513576	-0.96135	0.0375334	0.588665		depleted	not_significant
GO	Core	GO:0007548	GO:0007548	3	5.8414	8	9907	13568	0.513576	-0.96135	0.0375334	0.588665		depleted	not_significant
GO	Core	GO:0019079	GO:0019079	3	5.8414	8	9907	13568	0.513576	-0.96135	0.0375334	0.588665		depleted	not_significant
GO	Core	GO:0030951	GO:0030951	3	5.8414	8	9907	13568	0.513576	-0.96135	0.0375334	0.588665		depleted	not_significant
GO	Core	GO:0030952	GO:0030952	3	5.8414	8	9907	13568	0.513576	-0.96135	0.0375334	0.588665		depleted	not_significant
GO	Core	GO:0032009	GO:0032009	3	5.8414	8	9907	13568	0.513576	-0.96135	0.0375334	0.588665		depleted	not_significant
GO	Core	GO:0042177	GO:0042177	3	5.8414	8	9907	13568	0.513576	-0.96135	0.0375334	0.588665		depleted	not_significant
GO	Core	GO:0043202	GO:0043202	3	5.8414	8	9907	13568	0.513576	-0.96135	0.0375334	0.588665		depleted	not_significant
GO	Core	GO:0045637	GO:0045637	3	5.8414	8	9907	13568	0.513576	-0.96135	0.0375334	0.588665		depleted	not_significant
GO	Core	GO:0046855	GO:0046855	3	5.8414	8	9907	13568	0.513576	-0.96135	0.0375334	0.588665		depleted	not_significant
GO	Core	GO:0050879	GO:0050879	3	5.8414	8	9907	13568	0.513576	-0.96135	0.0375334	0.588665		depleted	not_significant
GO	Core	GO:0071265	GO:0071265	3	5.8414	8	9907	13568	0.513576	-0.96135	0.0375334	0.588665		depleted	not_significant
GO	Core	GO:0071545	GO:0071545	3	5.8414	8	9907	13568	0.513576	-0.96135	0.0375334	0.588665		depleted	not_significant
GO	Core	GO:0009532	GO:0009532	478	498.709	683	9907	13568	0.958475	-0.061187	0.0379361	0.589149		depleted	not_significant
GO	Core	GO:0051128	GO:0051128	365	383.341	525	9907	13568	0.952154	-0.070733	0.0379701	0.589149		depleted	not_significant
GO	Core	GO:0071482	GO:0071482	95	86.1605	118	9907	13568	1.10259	0.1409	0.0379549	0.589149		enriched	not_significant
GO	Core	GO:0097435	GO:0097435	93	102.954	141	9907	13568	0.903311	-0.146705	0.0379168	0.589149		depleted	not_significant
GO	Core	GO:0008017	GO:0008017	59	67.176	92	9907	13568	0.87829	-0.187231	0.0379214	0.589149		depleted	not_significant
GO	Core	GO:0032350	GO:0032350	58	51.1122	70	9907	13568	1.13476	0.182386	0.0379037	0.589149		enriched	not_significant
GO	Core	GO:0002181	GO:0002181	51	44.5406	61	9907	13568	1.14502	0.195376	0.0376662	0.589149		enriched	not_significant
GO	Core	GO:0030863	GO:0030863	33	39.4294	54	9907	13568	0.836939	-0.256805	0.0376453	0.589149		depleted	not_significant
GO	Core	GO:0007062	GO:0007062	15	19.7147	27	9907	13568	0.760854	-0.394309	0.0381056	0.590149		depleted	not_significant
GO	Core	GO:0043687	GO:0043687	15	19.7147	27	9907	13568	0.760854	-0.394309	0.0381056	0.590149		depleted	not_significant
GO	Core	GO:0044260	GO:0044260	2319	2358.46	3230	9907	13568	0.983268	-0.024343	0.03873	0.590865		depleted	not_significant
GO	Core	GO:0033993	GO:0033993	557	535.948	734	9907	13568	1.03928	0.055585	0.0383372	0.590865		enriched	not_significant
GO	Core	GO:0006304	GO:0006304	31	37.2389	51	9907	13568	0.832463	-0.264541	0.0383139	0.590865		depleted	not_significant
GO	Core	GO:0032147	GO:0032147	31	37.2389	51	9907	13568	0.832463	-0.264541	0.0383139	0.590865		depleted	not_significant
GO	Core	GO:0032508	GO:0032508	31	37.2389	51	9907	13568	0.832463	-0.264541	0.0383139	0.590865		depleted	not_significant
GO	Core	GO:1903047	GO:1903047	176	189.115	259	9907	13568	0.93065	-0.103689	0.0389755	0.59179		depleted	not_significant
GO	Core	GO:0034440	GO:0034440	46	53.3027	73	9907	13568	0.862996	-0.212575	0.0390338	0.59179		depleted	not_significant
GO	Core	GO:0071166	GO:0071166	46	53.3027	73	9907	13568	0.862996	-0.212575	0.0390338	0.59179		depleted	not_significant
GO	Core	GO:0071426	GO:0071426	46	53.3027	73	9907	13568	0.862996	-0.212575	0.0390338	0.59179		depleted	not_significant
GO	Core	GO:0000723	GO:0000723	17	21.9052	30	9907	13568	0.776071	-0.36574	0.039107	0.59179		depleted	not_significant
GO	Core	GO:0009850	GO:0009850	17	21.9052	30	9907	13568	0.776071	-0.36574	0.039107	0.59179		depleted	not_significant
GO	Core	GO:0030837	GO:0030837	17	21.9052	30	9907	13568	0.776071	-0.36574	0.039107	0.59179		depleted	not_significant
GO	Core	GO:0042180	GO:0042180	17	21.9052	30	9907	13568	0.776071	-0.36574	0.039107	0.59179		depleted	not_significant
GO	Core	GO:0031333	GO:0031333	19	24.0957	33	9907	13568	0.788521	-0.342779	0.0396947	0.595609		depleted	not_significant
GO	Core	GO:0099503	GO:0099503	19	24.0957	33	9907	13568	0.788521	-0.342779	0.0396947	0.595609		depleted	not_significant
GO	Core	GO:0009628	GO:0009628	1545	1512.19	2071	9907	13568	1.0217	0.030967	0.0406116	0.598621		enriched	not_significant
GO	Core	GO:0019725	GO:0019725	150	162.099	222	9907	13568	0.925363	-0.111909	0.0403265	0.598621		depleted	not_significant
GO	Core	GO:0006890	GO:0006890	23	28.4768	39	9907	13568	0.807675	-0.308152	0.039959	0.598621		depleted	not_significant
GO	Core	GO:2000762	GO:2000762	20	16.0638	22	9907	13568	1.24503	0.316184	0.0401286	0.598621		enriched	not_significant
GO	Core	GO:0008150	GO:0008150	8449	8480.97	11615	9907	13568	0.99623	-0.005449	0.0409068	0.602385		depleted	not_significant
GO	Core	GO:0090698	GO:0090698	204	191.306	262	9907	13568	1.06636	0.09269	0.0412445	0.602753		enriched	not_significant
GO	Core	GO:0000281	GO:0000281	80	89.0812	122	9907	13568	0.898057	-0.155121	0.0417586	0.602753		depleted	not_significant
GO	Core	GO:0055029	GO:0055029	64	72.2872	99	9907	13568	0.885357	-0.175669	0.0410237	0.602753		depleted	not_significant
GO	Core	GO:0006817	GO:0006817	8	11.6828	16	9907	13568	0.684768	-0.546312	0.0417917	0.602753		depleted	not_significant
GO	Core	GO:0010440	GO:0010440	8	11.6828	16	9907	13568	0.684768	-0.546312	0.0417917	0.602753		depleted	not_significant
GO	Core	GO:0031312	GO:0031312	8	11.6828	16	9907	13568	0.684768	-0.546312	0.0417917	0.602753		depleted	not_significant
GO	Core	GO:0045666	GO:0045666	8	11.6828	16	9907	13568	0.684768	-0.546312	0.0417917	0.602753		depleted	not_significant
GO	Core	GO:0060992	GO:0060992	8	11.6828	16	9907	13568	0.684768	-0.546312	0.0417917	0.602753		depleted	not_significant
GO	Core	GO:0000910	GO:0000910	87	96.383	132	9907	13568	0.902649	-0.147763	0.0423459	0.605651		depleted	not_significant
GO	Core	GO:0006862	GO:0006862	28	23.3656	32	9907	13568	1.19834	0.261043	0.0425077	0.607048		enriched	not_significant
GO	Core	GO:0009827	GO:0009827	28	23.3656	32	9907	13568	1.19834	0.261043	0.0425077	0.607048		enriched	not_significant
GO	Core	GO:0019899	GO:0019899	347	364.357	499	9907	13568	0.952363	-0.070416	0.0428335	0.607128		depleted	not_significant
GO	Core	GO:0030166	GO:0030166	10	7.3017	10	9907	13568	1.36954	0.453688	0.043026	0.607128		enriched	not_significant
GO	Core	GO:0032922	GO:0032922	10	7.3017	10	9907	13568	1.36954	0.453688	0.043026	0.607128		enriched	not_significant
GO	Core	GO:0042873	GO:0042873	10	7.3017	10	9907	13568	1.36954	0.453688	0.043026	0.607128		enriched	not_significant
GO	Core	GO:0042879	GO:0042879	10	7.3017	10	9907	13568	1.36954	0.453688	0.043026	0.607128		enriched	not_significant
GO	Core	GO:1903578	GO:1903578	10	7.3017	10	9907	13568	1.36954	0.453688	0.043026	0.607128		enriched	not_significant
GO	Core	GO:2001169	GO:2001169	10	7.3017	10	9907	13568	1.36954	0.453688	0.043026	0.607128		enriched	not_significant
GO	Core	GO:0065007	GO:0065007	3809	3765.51	5157	9907	13568	1.01155	0.016568	0.0432135	0.607427		enriched	not_significant
GO	Core	GO:0044085	GO:0044085	818	843.351	1155	9907	13568	0.96994	-0.044032	0.0432574	0.607678		depleted	not_significant
GO	Core	GO:1900140	GO:1900140	84	75.9381	104	9907	13568	1.10616	0.145566	0.0433149	0.607884		enriched	not_significant
GO	Core	GO:1902680	GO:1902680	397	379.69	520	9907	13568	1.04559	0.064315	0.0438256	0.612932		enriched	not_significant
GO	Core	GO:1903508	GO:1903508	397	379.69	520	9907	13568	1.04559	0.064315	0.0438256	0.612932		enriched	not_significant
GO	Core	GO:0006650	GO:0006650	69	77.3984	106	9907	13568	0.891491	-0.165708	0.0439195	0.613039		depleted	not_significant
GO	Core	GO:0016607	GO:0016607	69	77.3984	106	9907	13568	0.891491	-0.165708	0.0439195	0.613039		depleted	not_significant
GO	Core	GO:0016798	GO:0016798	163	175.242	240	9907	13568	0.930144	-0.104475	0.0442156	0.616808		depleted	not_significant
GO	Core	GO:0008092	GO:0008092	151	162.829	223	9907	13568	0.927354	-0.108807	0.0442329	0.616808		depleted	not_significant
GO	Core	GO:0006793	GO:0006793	1036	1063.86	1457	9907	13568	0.973809	-0.038289	0.0443292	0.617188		depleted	not_significant
GO	Core	GO:0071669	GO:0071669	200	187.655	257	9907	13568	1.06579	0.09192	0.0443728	0.617245		enriched	not_significant
GO	Core	GO:0016020	GO:0016020	3156	3197.43	4379	9907	13568	0.987042	-0.018816	0.0453908	0.62003		depleted	not_significant
GO	Core	GO:0010467	GO:0010467	770	794.429	1088	9907	13568	0.969249	-0.04506	0.0449561	0.62003		depleted	not_significant
GO	Core	GO:0006281	GO:0006281	173	185.464	254	9907	13568	0.932795	-0.100369	0.0455904	0.62003		depleted	not_significant
GO	Core	GO:0080135	GO:0080135	67	75.2079	103	9907	13568	0.890864	-0.166723	0.0455301	0.62003		depleted	not_significant
GO	Core	GO:0005615	GO:0005615	58	65.7157	90	9907	13568	0.88259	-0.180184	0.0455344	0.62003		depleted	not_significant
GO	Core	GO:0007033	GO:0007033	58	65.7157	90	9907	13568	0.88259	-0.180184	0.0455344	0.62003		depleted	not_significant
GO	Core	GO:0045017	GO:0045017	49	56.2234	77	9907	13568	0.871523	-0.198389	0.0446606	0.62003		depleted	not_significant
GO	Core	GO:0000303	GO:0000303	15	11.6828	16	9907	13568	1.28394	0.360579	0.0450406	0.62003		enriched	not_significant
GO	Core	GO:0004864	GO:0004864	15	11.6828	16	9907	13568	1.28394	0.360579	0.0450406	0.62003		enriched	not_significant
GO	Core	GO:0006029	GO:0006029	15	11.6828	16	9907	13568	1.28394	0.360579	0.0450406	0.62003		enriched	not_significant
GO	Core	GO:0015166	GO:0015166	15	11.6828	16	9907	13568	1.28394	0.360579	0.0450406	0.62003		enriched	not_significant
GO	Core	GO:0015791	GO:0015791	15	11.6828	16	9907	13568	1.28394	0.360579	0.0450406	0.62003		enriched	not_significant
GO	Core	GO:0032515	GO:0032515	15	11.6828	16	9907	13568	1.28394	0.360579	0.0450406	0.62003		enriched	not_significant
GO	Core	GO:0010497	GO:0010497	10	13.8733	19	9907	13568	0.720809	-0.472312	0.0455998	0.62003		depleted	not_significant
GO	Core	GO:0016144	GO:0016144	10	13.8733	19	9907	13568	0.720809	-0.472312	0.0455998	0.62003		depleted	not_significant
GO	Core	GO:0018196	GO:0018196	10	13.8733	19	9907	13568	0.720809	-0.472312	0.0455998	0.62003		depleted	not_significant
GO	Core	GO:0018279	GO:0018279	10	13.8733	19	9907	13568	0.720809	-0.472312	0.0455998	0.62003		depleted	not_significant
GO	Core	GO:0019758	GO:0019758	10	13.8733	19	9907	13568	0.720809	-0.472312	0.0455998	0.62003		depleted	not_significant
GO	Core	GO:0019761	GO:0019761	10	13.8733	19	9907	13568	0.720809	-0.472312	0.0455998	0.62003		depleted	not_significant
GO	Core	GO:0050769	GO:0050769	10	13.8733	19	9907	13568	0.720809	-0.472312	0.0455998	0.62003		depleted	not_significant
GO	Core	GO:0051962	GO:0051962	10	13.8733	19	9907	13568	0.720809	-0.472312	0.0455998	0.62003		depleted	not_significant
GO	Core	GO:0046483	GO:0046483	1712	1745.85	2391	9907	13568	0.980613	-0.028244	0.0456861	0.620628		depleted	not_significant
GO	Core	GO:0070647	GO:0070647	393	376.04	515	9907	13568	1.0451	0.063645	0.0464967	0.627255		enriched	not_significant
GO	Core	GO:0043087	GO:0043087	32	37.969	52	9907	13568	0.842792	-0.246752	0.0469208	0.62928		depleted	not_significant
GO	Core	GO:0140030	GO:0140030	32	37.969	52	9907	13568	0.842792	-0.246752	0.0469208	0.62928		depleted	not_significant
GO	Core	GO:0009526	GO:0009526	409	427.152	585	9907	13568	0.957505	-0.062648	0.0475113	0.632176		depleted	not_significant
GO	Core	GO:0009664	GO:0009664	112	102.954	141	9907	13568	1.08786	0.121491	0.0487128	0.632176		enriched	not_significant
GO	Core	GO:0009100	GO:0009100	65	73.0174	100	9907	13568	0.890199	-0.1678	0.047201	0.632176		depleted	not_significant
GO	Core	GO:0072329	GO:0072329	45	51.8423	71	9907	13568	0.868016	-0.204206	0.0475874	0.632176		depleted	not_significant
GO	Core	GO:1900618	GO:1900618	35	29.9371	41	9907	13568	1.16912	0.225419	0.0479593	0.632176		enriched	not_significant
GO	Core	GO:0000407	GO:0000407	12	16.0638	22	9907	13568	0.74702	-0.420781	0.048166	0.632176		depleted	not_significant
GO	Core	GO:0000792	GO:0000792	12	16.0638	22	9907	13568	0.74702	-0.420781	0.048166	0.632176		depleted	not_significant
GO	Core	GO:0004176	GO:0004176	12	16.0638	22	9907	13568	0.74702	-0.420781	0.048166	0.632176		depleted	not_significant
GO	Core	GO:0009501	GO:0009501	12	16.0638	22	9907	13568	0.74702	-0.420781	0.048166	0.632176		depleted	not_significant
GO	Core	GO:0030515	GO:0030515	12	16.0638	22	9907	13568	0.74702	-0.420781	0.048166	0.632176		depleted	not_significant
GO	Core	GO:0034330	GO:0034330	12	16.0638	22	9907	13568	0.74702	-0.420781	0.048166	0.632176		depleted	not_significant
GO	Core	GO:0045216	GO:0045216	12	16.0638	22	9907	13568	0.74702	-0.420781	0.048166	0.632176		depleted	not_significant
GO	Core	GO:0005546	GO:0005546	5	8.0319	11	9907	13568	0.622517	-0.683816	0.0487487	0.632176		depleted	not_significant
GO	Core	GO:0006271	GO:0006271	5	8.0319	11	9907	13568	0.622517	-0.683816	0.0487487	0.632176		depleted	not_significant
GO	Core	GO:0006558	GO:0006558	5	8.0319	11	9907	13568	0.622517	-0.683816	0.0487487	0.632176		depleted	not_significant
GO	Core	GO:0010222	GO:0010222	5	8.0319	11	9907	13568	0.622517	-0.683816	0.0487487	0.632176		depleted	not_significant
GO	Core	GO:0016459	GO:0016459	5	8.0319	11	9907	13568	0.622517	-0.683816	0.0487487	0.632176		depleted	not_significant
GO	Core	GO:0016868	GO:0016868	5	8.0319	11	9907	13568	0.622517	-0.683816	0.0487487	0.632176		depleted	not_significant
GO	Core	GO:0019058	GO:0019058	5	8.0319	11	9907	13568	0.622517	-0.683816	0.0487487	0.632176		depleted	not_significant
GO	Core	GO:0022616	GO:0022616	5	8.0319	11	9907	13568	0.622517	-0.683816	0.0487487	0.632176		depleted	not_significant
GO	Core	GO:0031110	GO:0031110	5	8.0319	11	9907	13568	0.622517	-0.683816	0.0487487	0.632176		depleted	not_significant
GO	Core	GO:0055071	GO:0055071	5	8.0319	11	9907	13568	0.622517	-0.683816	0.0487487	0.632176		depleted	not_significant
GO	Core	GO:1902221	GO:1902221	5	8.0319	11	9907	13568	0.622517	-0.683816	0.0487487	0.632176		depleted	not_significant
GO	Core	GO:0001891	GO:0001891	2	4.381	6	9907	13568	0.456512	-1.13128	0.0490054	0.632176		depleted	not_significant
GO	Core	GO:0001931	GO:0001931	2	4.381	6	9907	13568	0.456512	-1.13128	0.0490054	0.632176		depleted	not_significant
GO	Core	GO:0004560	GO:0004560	2	4.381	6	9907	13568	0.456512	-1.13128	0.0490054	0.632176		depleted	not_significant
GO	Core	GO:0004576	GO:0004576	2	4.381	6	9907	13568	0.456512	-1.13128	0.0490054	0.632176		depleted	not_significant
GO	Core	GO:0004579	GO:0004579	2	4.381	6	9907	13568	0.456512	-1.13128	0.0490054	0.632176		depleted	not_significant
GO	Core	GO:0005095	GO:0005095	2	4.381	6	9907	13568	0.456512	-1.13128	0.0490054	0.632176		depleted	not_significant
GO	Core	GO:0006269	GO:0006269	2	4.381	6	9907	13568	0.456512	-1.13128	0.0490054	0.632176		depleted	not_significant
GO	Core	GO:0006517	GO:0006517	2	4.381	6	9907	13568	0.456512	-1.13128	0.0490054	0.632176		depleted	not_significant
GO	Core	GO:0006616	GO:0006616	2	4.381	6	9907	13568	0.456512	-1.13128	0.0490054	0.632176		depleted	not_significant
GO	Core	GO:0007143	GO:0007143	2	4.381	6	9907	13568	0.456512	-1.13128	0.0490054	0.632176		depleted	not_significant
GO	Core	GO:0008375	GO:0008375	2	4.381	6	9907	13568	0.456512	-1.13128	0.0490054	0.632176		depleted	not_significant
GO	Core	GO:0008589	GO:0008589	2	4.381	6	9907	13568	0.456512	-1.13128	0.0490054	0.632176		depleted	not_significant
GO	Core	GO:0008964	GO:0008964	2	4.381	6	9907	13568	0.456512	-1.13128	0.0490054	0.632176		depleted	not_significant
GO	Core	GO:0009806	GO:0009806	2	4.381	6	9907	13568	0.456512	-1.13128	0.0490054	0.632176		depleted	not_significant
GO	Core	GO:0009807	GO:0009807	2	4.381	6	9907	13568	0.456512	-1.13128	0.0490054	0.632176		depleted	not_significant
GO	Core	GO:0010333	GO:0010333	2	4.381	6	9907	13568	0.456512	-1.13128	0.0490054	0.632176		depleted	not_significant
GO	Core	GO:0010597	GO:0010597	2	4.381	6	9907	13568	0.456512	-1.13128	0.0490054	0.632176		depleted	not_significant
GO	Core	GO:0015928	GO:0015928	2	4.381	6	9907	13568	0.456512	-1.13128	0.0490054	0.632176		depleted	not_significant
GO	Core	GO:0016460	GO:0016460	2	4.381	6	9907	13568	0.456512	-1.13128	0.0490054	0.632176		depleted	not_significant
GO	Core	GO:0016504	GO:0016504	2	4.381	6	9907	13568	0.456512	-1.13128	0.0490054	0.632176		depleted	not_significant
GO	Core	GO:0019372	GO:0019372	2	4.381	6	9907	13568	0.456512	-1.13128	0.0490054	0.632176		depleted	not_significant
GO	Core	GO:0019405	GO:0019405	2	4.381	6	9907	13568	0.456512	-1.13128	0.0490054	0.632176		depleted	not_significant
GO	Core	GO:0019509	GO:0019509	2	4.381	6	9907	13568	0.456512	-1.13128	0.0490054	0.632176		depleted	not_significant
GO	Core	GO:0019563	GO:0019563	2	4.381	6	9907	13568	0.456512	-1.13128	0.0490054	0.632176		depleted	not_significant
GO	Core	GO:0031034	GO:0031034	2	4.381	6	9907	13568	0.456512	-1.13128	0.0490054	0.632176		depleted	not_significant
GO	Core	GO:0031254	GO:0031254	2	4.381	6	9907	13568	0.456512	-1.13128	0.0490054	0.632176		depleted	not_significant
GO	Core	GO:0031268	GO:0031268	2	4.381	6	9907	13568	0.456512	-1.13128	0.0490054	0.632176		depleted	not_significant
GO	Core	GO:0031428	GO:0031428	2	4.381	6	9907	13568	0.456512	-1.13128	0.0490054	0.632176		depleted	not_significant
GO	Core	GO:0031683	GO:0031683	2	4.381	6	9907	13568	0.456512	-1.13128	0.0490054	0.632176		depleted	not_significant
GO	Core	GO:0031929	GO:0031929	2	4.381	6	9907	13568	0.456512	-1.13128	0.0490054	0.632176		depleted	not_significant
GO	Core	GO:0032042	GO:0032042	2	4.381	6	9907	13568	0.456512	-1.13128	0.0490054	0.632176		depleted	not_significant
GO	Core	GO:0032796	GO:0032796	2	4.381	6	9907	13568	0.456512	-1.13128	0.0490054	0.632176		depleted	not_significant
GO	Core	GO:0033281	GO:0033281	2	4.381	6	9907	13568	0.456512	-1.13128	0.0490054	0.632176		depleted	not_significant
GO	Core	GO:0034461	GO:0034461	2	4.381	6	9907	13568	0.456512	-1.13128	0.0490054	0.632176		depleted	not_significant
GO	Core	GO:0035088	GO:0035088	2	4.381	6	9907	13568	0.456512	-1.13128	0.0490054	0.632176		depleted	not_significant
GO	Core	GO:0035090	GO:0035090	2	4.381	6	9907	13568	0.456512	-1.13128	0.0490054	0.632176		depleted	not_significant
GO	Core	GO:0042406	GO:0042406	2	4.381	6	9907	13568	0.456512	-1.13128	0.0490054	0.632176		depleted	not_significant
GO	Core	GO:0043102	GO:0043102	2	4.381	6	9907	13568	0.456512	-1.13128	0.0490054	0.632176		depleted	not_significant
GO	Core	GO:0043982	GO:0043982	2	4.381	6	9907	13568	0.456512	-1.13128	0.0490054	0.632176		depleted	not_significant
GO	Core	GO:0043984	GO:0043984	2	4.381	6	9907	13568	0.456512	-1.13128	0.0490054	0.632176		depleted	not_significant
GO	Core	GO:0045197	GO:0045197	2	4.381	6	9907	13568	0.456512	-1.13128	0.0490054	0.632176		depleted	not_significant
GO	Core	GO:0045199	GO:0045199	2	4.381	6	9907	13568	0.456512	-1.13128	0.0490054	0.632176		depleted	not_significant
GO	Core	GO:0045806	GO:0045806	2	4.381	6	9907	13568	0.456512	-1.13128	0.0490054	0.632176		depleted	not_significant
GO	Core	GO:0061245	GO:0061245	2	4.381	6	9907	13568	0.456512	-1.13128	0.0490054	0.632176		depleted	not_significant
GO	Core	GO:0071267	GO:0071267	2	4.381	6	9907	13568	0.456512	-1.13128	0.0490054	0.632176		depleted	not_significant
GO	Core	GO:0090065	GO:0090065	2	4.381	6	9907	13568	0.456512	-1.13128	0.0490054	0.632176		depleted	not_significant
GO	Core	GO:1902459	GO:1902459	2	4.381	6	9907	13568	0.456512	-1.13128	0.0490054	0.632176		depleted	not_significant
GO	Core	GO:1990753	GO:1990753	2	4.381	6	9907	13568	0.456512	-1.13128	0.0490054	0.632176		depleted	not_significant
GO	Core	GO:0009570	GO:0009570	473	492.137	674	9907	13568	0.961114	-0.05722	0.0495787	0.637026		depleted	not_significant
GO	Core	GO:0071496	GO:0071496	174	186.194	255	9907	13568	0.934507	-0.097722	0.0495919	0.637026		depleted	not_significant
GO	Core	GO:0051336	GO:0051336	93	102.224	140	9907	13568	0.909764	-0.136436	0.0497264	0.637026		depleted	not_significant
GO	Core	GO:0019751	GO:0019751	26	31.3975	43	9907	13568	0.828092	-0.272137	0.0496996	0.637026		depleted	not_significant
GO	Core	GO:0004712	GO:0004712	14	18.2543	25	9907	13568	0.766941	-0.382813	0.0498073	0.637026		depleted	not_significant
GO	Core	GO:0005732	GO:0005732	14	18.2543	25	9907	13568	0.766941	-0.382813	0.0498073	0.637026		depleted	not_significant
GO	Core	GO:0042162	GO:0042162	14	18.2543	25	9907	13568	0.766941	-0.382813	0.0498073	0.637026		depleted	not_significant
GO	Core	GO:1902905	GO:1902905	14	18.2543	25	9907	13568	0.766941	-0.382813	0.0498073	0.637026		depleted	not_significant
GO	Core	GO:0071214	GO:0071214	177	165.75	227	9907	13568	1.06788	0.094745	0.0503315	0.641578		enriched	not_significant
GO	Core	GO:0104004	GO:0104004	177	165.75	227	9907	13568	1.06788	0.094745	0.0503315	0.641578		enriched	not_significant
GO	Core	GO:0051651	GO:0051651	16	20.4449	28	9907	13568	0.782592	-0.353667	0.0507542	0.64594		depleted	not_significant
GO	Core	GO:0010582	GO:0010582	22	27.0164	37	9907	13568	0.814319	-0.296334	0.0509139	0.646468		depleted	not_significant
GO	Core	GO:0006259	GO:0006259	360	376.77	516	9907	13568	0.955491	-0.065686	0.0511455	0.647524		depleted	not_significant
GO	Core	GO:0031344	GO:0031344	20	24.8259	34	9907	13568	0.80561	-0.311847	0.0511977	0.647524		depleted	not_significant
GO	Core	GO:0098797	GO:0098797	20	24.8259	34	9907	13568	0.80561	-0.311847	0.0511977	0.647524		depleted	not_significant
GO	Core	GO:0120035	GO:0120035	20	24.8259	34	9907	13568	0.80561	-0.311847	0.0511977	0.647524		depleted	not_significant
GO	Core	GO:0032200	GO:0032200	18	22.6354	31	9907	13568	0.795215	-0.330583	0.0511759	0.647524		depleted	not_significant
GO	Core	GO:0022402	GO:0022402	305	320.546	439	9907	13568	0.9515	-0.071724	0.051302	0.648556		depleted	not_significant
GO	Core	GO:0071407	GO:0071407	105	114.637	157	9907	13568	0.915932	-0.126687	0.051341	0.64876		depleted	not_significant
GO	Core	GO:0046910	GO:0046910	27	22.6354	31	9907	13568	1.19282	0.254379	0.0517346	0.652573		enriched	not_significant
GO	Core	GO:0009991	GO:0009991	194	206.639	283	9907	13568	0.938834	-0.091057	0.051801	0.653119		depleted	not_significant
GO	Core	GO:0006796	GO:0006796	1017	1043.42	1429	9907	13568	0.974681	-0.036998	0.0518701	0.653551		depleted	not_significant
GO	Core	GO:0048364	GO:0048364	408	391.373	536	9907	13568	1.04248	0.060024	0.0533631	0.653551		enriched	not_significant
GO	Core	GO:0017144	GO:0017144	268	282.577	387	9907	13568	0.948413	-0.076413	0.0523235	0.653551		depleted	not_significant
GO	Core	GO:0010498	GO:0010498	204	192.036	263	9907	13568	1.0623	0.087194	0.0519123	0.653551		enriched	not_significant
GO	Core	GO:0047484	GO:0047484	59	52.5725	72	9907	13568	1.12226	0.166406	0.0531276	0.653551		enriched	not_significant
GO	Core	GO:0009617	GO:0009617	399	382.611	524	9907	13568	1.04283	0.06051	0.0540608	0.653901		enriched	not_significant
GO	Core	GO:0005488	GO:0005488	3490	3450.8	4726	9907	13568	1.01136	0.016295	0.0579285	0.654869		enriched	not_significant
GO	Core	GO:0003723	GO:0003723	911	887.891	1216	9907	13568	1.02603	0.037068	0.0621619	0.654869		enriched	not_significant
GO	Core	GO:0055085	GO:0055085	660	681.252	933	9907	13568	0.968804	-0.045723	0.057183	0.654869		depleted	not_significant
GO	Core	GO:0098588	GO:0098588	617	637.442	873	9907	13568	0.967931	-0.047023	0.058834	0.654869		depleted	not_significant
GO	Core	GO:0022622	GO:0022622	410	393.564	539	9907	13568	1.04176	0.059027	0.0559921	0.654869		enriched	not_significant
GO	Core	GO:1902679	GO:1902679	241	228.544	313	9907	13568	1.0545	0.076558	0.0600234	0.654869		enriched	not_significant
GO	Core	GO:1903507	GO:1903507	241	228.544	313	9907	13568	1.0545	0.076558	0.0600234	0.654869		enriched	not_significant
GO	Core	GO:0045087	GO:0045087	205	217.592	298	9907	13568	0.942131	-0.086001	0.0568125	0.654869		depleted	not_significant
GO	Core	GO:0022804	GO:0022804	202	213.941	293	9907	13568	0.944186	-0.082857	0.0654386	0.654869		depleted	not_significant
GO	Core	GO:0090407	GO:0090407	200	212.481	291	9907	13568	0.941262	-0.087331	0.0564097	0.654869		depleted	not_significant
GO	Core	GO:0006091	GO:0006091	184	195.687	268	9907	13568	0.940279	-0.088839	0.0615625	0.654869		depleted	not_significant
GO	Core	GO:0038023	GO:0038023	169	158.448	217	9907	13568	1.0666	0.093016	0.0584552	0.654869		enriched	not_significant
GO	Core	GO:0048528	GO:0048528	123	113.907	156	9907	13568	1.07983	0.1108	0.0569006	0.654869		enriched	not_significant
GO	Core	GO:0019199	GO:0019199	122	113.177	155	9907	13568	1.07796	0.108301	0.0623799	0.654869		enriched	not_significant
GO	Core	GO:0050776	GO:0050776	115	124.86	171	9907	13568	0.921033	-0.118675	0.0543394	0.654869		depleted	not_significant
GO	Core	GO:0030554	GO:0030554	111	120.479	165	9907	13568	0.921325	-0.118218	0.0585703	0.654869		depleted	not_significant
GO	Core	GO:0032559	GO:0032559	111	120.479	165	9907	13568	0.921325	-0.118218	0.0585703	0.654869		depleted	not_significant
GO	Core	GO:0040029	GO:0040029	106	115.368	158	9907	13568	0.918803	-0.122172	0.0570241	0.654869		depleted	not_significant
GO	Core	GO:0051052	GO:0051052	104	113.177	155	9907	13568	0.918915	-0.121997	0.0592189	0.654869		depleted	not_significant
GO	Core	GO:0006417	GO:0006417	100	92.0019	126	9907	13568	1.08693	0.120264	0.0624246	0.654869		enriched	not_significant
GO	Core	GO:0015931	GO:0015931	95	103.685	142	9907	13568	0.916239	-0.126204	0.0620362	0.654869		depleted	not_significant
GO	Core	GO:0005524	GO:0005524	94	102.954	141	9907	13568	0.913024	-0.131275	0.0556312	0.654869		depleted	not_significant
GO	Core	GO:0010150	GO:0010150	94	86.1605	118	9907	13568	1.09099	0.125634	0.0601491	0.654869		enriched	not_significant
GO	Core	GO:0098813	GO:0098813	73	81.0493	111	9907	13568	0.900686	-0.150903	0.0549723	0.654869		depleted	not_significant
GO	Core	GO:0010639	GO:0010639	64	71.557	98	9907	13568	0.894391	-0.161022	0.0560852	0.654869		depleted	not_significant
GO	Core	GO:0009156	GO:0009156	60	67.176	92	9907	13568	0.893176	-0.162983	0.0604232	0.654869		depleted	not_significant
GO	Core	GO:0016050	GO:0016050	57	64.2553	88	9907	13568	0.887086	-0.172854	0.0545298	0.654869		depleted	not_significant
GO	Core	GO:0065002	GO:0065002	56	62.795	86	9907	13568	0.891791	-0.165222	0.0651172	0.654869		depleted	not_significant
GO	Core	GO:0010928	GO:0010928	52	46.001	63	9907	13568	1.13041	0.176848	0.0543795	0.654869		enriched	not_significant
GO	Core	GO:0140101	GO:0140101	51	57.6837	79	9907	13568	0.884131	-0.177667	0.0607638	0.654869		depleted	not_significant
GO	Core	GO:0055067	GO:0055067	49	55.4932	76	9907	13568	0.882991	-0.17953	0.0629932	0.654869		depleted	not_significant
GO	Core	GO:0031123	GO:0031123	46	52.5725	72	9907	13568	0.874982	-0.192675	0.0559456	0.654869		depleted	not_significant
GO	Core	GO:0042631	GO:0042631	45	39.4294	54	9907	13568	1.14128	0.190654	0.0547622	0.654869		enriched	not_significant
GO	Core	GO:0071462	GO:0071462	45	39.4294	54	9907	13568	1.14128	0.190654	0.0547622	0.654869		enriched	not_significant
GO	Core	GO:0005871	GO:0005871	44	50.382	69	9907	13568	0.873328	-0.195405	0.0578629	0.654869		depleted	not_significant
GO	Core	GO:0003777	GO:0003777	42	48.1915	66	9907	13568	0.871523	-0.198389	0.0598295	0.654869		depleted	not_significant
GO	Core	GO:0120114	GO:0120114	42	48.1915	66	9907	13568	0.871523	-0.198389	0.0598295	0.654869		depleted	not_significant
GO	Core	GO:0012506	GO:0012506	40	46.001	63	9907	13568	0.869547	-0.201664	0.0618426	0.654869		depleted	not_significant
GO	Core	GO:0030532	GO:0030532	40	46.001	63	9907	13568	0.869547	-0.201664	0.0618426	0.654869		depleted	not_significant
GO	Core	GO:0032956	GO:0032956	40	46.001	63	9907	13568	0.869547	-0.201664	0.0618426	0.654869		depleted	not_significant
GO	Core	GO:0048481	GO:0048481	40	46.001	63	9907	13568	0.869547	-0.201664	0.0618426	0.654869		depleted	not_significant
GO	Core	GO:0000819	GO:0000819	38	43.8104	60	9907	13568	0.867373	-0.205275	0.0638985	0.654869		depleted	not_significant
GO	Core	GO:0009846	GO:0009846	38	43.8104	60	9907	13568	0.867373	-0.205275	0.0638985	0.654869		depleted	not_significant
GO	Core	GO:0016197	GO:0016197	38	43.8104	60	9907	13568	0.867373	-0.205275	0.0638985	0.654869		depleted	not_significant
GO	Core	GO:0097525	GO:0097525	38	43.8104	60	9907	13568	0.867373	-0.205275	0.0638985	0.654869		depleted	not_significant
GO	Core	GO:0031497	GO:0031497	37	32.1277	44	9907	13568	1.15166	0.20371	0.0631975	0.654869		enriched	not_significant
GO	Core	GO:0048826	GO:0048826	37	32.1277	44	9907	13568	1.15166	0.20371	0.0631975	0.654869		enriched	not_significant
GO	Core	GO:0005815	GO:0005815	33	38.6992	53	9907	13568	0.85273	-0.229838	0.0568298	0.654869		depleted	not_significant
GO	Core	GO:0018208	GO:0018208	33	38.6992	53	9907	13568	0.85273	-0.229838	0.0568298	0.654869		depleted	not_significant
GO	Core	GO:0016859	GO:0016859	31	36.5087	50	9907	13568	0.849113	-0.235972	0.0583573	0.654869		depleted	not_significant
GO	Core	GO:0009937	GO:0009937	30	25.5561	35	9907	13568	1.17389	0.231295	0.0601458	0.654869		enriched	not_significant
GO	Core	GO:0031490	GO:0031490	30	25.5561	35	9907	13568	1.17389	0.231295	0.0601458	0.654869		enriched	not_significant
GO	Core	GO:0006352	GO:0006352	29	34.3182	47	9907	13568	0.845033	-0.24292	0.059844	0.654869		depleted	not_significant
GO	Core	GO:0046474	GO:0046474	29	34.3182	47	9907	13568	0.845033	-0.24292	0.059844	0.654869		depleted	not_significant
GO	Core	GO:0043424	GO:0043424	26	21.9052	30	9907	13568	1.18693	0.247237	0.0627445	0.654869		enriched	not_significant
GO	Core	GO:0010022	GO:0010022	25	29.9371	41	9907	13568	0.835083	-0.260008	0.062596	0.654869		depleted	not_significant
GO	Core	GO:0031124	GO:0031124	25	29.9371	41	9907	13568	0.835083	-0.260008	0.062596	0.654869		depleted	not_significant
GO	Core	GO:0071417	GO:0071417	23	27.7466	38	9907	13568	0.82893	-0.270678	0.0637919	0.654869		depleted	not_significant
GO	Core	GO:0070696	GO:0070696	22	18.2543	25	9907	13568	1.20519	0.269263	0.0642558	0.654869		enriched	not_significant
GO	Core	GO:0030662	GO:0030662	21	25.5561	35	9907	13568	0.821722	-0.283278	0.064803	0.654869		depleted	not_significant
GO	Core	GO:0000123	GO:0000123	19	23.3656	32	9907	13568	0.813162	-0.298385	0.0655607	0.654869		depleted	not_significant
GO	Core	GO:0005977	GO:0005977	19	23.3656	32	9907	13568	0.813162	-0.298385	0.0655607	0.654869		depleted	not_significant
GO	Core	GO:0006112	GO:0006112	19	23.3656	32	9907	13568	0.813162	-0.298385	0.0655607	0.654869		depleted	not_significant
GO	Core	GO:0006367	GO:0006367	19	23.3656	32	9907	13568	0.813162	-0.298385	0.0655607	0.654869		depleted	not_significant
GO	Core	GO:0051270	GO:0051270	19	23.3656	32	9907	13568	0.813162	-0.298385	0.0655607	0.654869		depleted	not_significant
GO	Core	GO:0051495	GO:0051495	19	23.3656	32	9907	13568	0.813162	-0.298385	0.0655607	0.654869		depleted	not_significant
GO	Core	GO:0010923	GO:0010923	18	14.6035	20	9907	13568	1.23258	0.301685	0.0635845	0.654869		enriched	not_significant
GO	Core	GO:0020037	GO:0020037	18	14.6035	20	9907	13568	1.23258	0.301685	0.0635845	0.654869		enriched	not_significant
GO	Core	GO:0032266	GO:0032266	18	14.6035	20	9907	13568	1.23258	0.301685	0.0635845	0.654869		enriched	not_significant
GO	Core	GO:1905177	GO:1905177	18	14.6035	20	9907	13568	1.23258	0.301685	0.0635845	0.654869		enriched	not_significant
GO	Core	GO:0005200	GO:0005200	17	21.175	29	9907	13568	0.802832	-0.31683	0.0659728	0.654869		depleted	not_significant
GO	Core	GO:0010020	GO:0010020	17	21.175	29	9907	13568	0.802832	-0.31683	0.0659728	0.654869		depleted	not_significant
GO	Core	GO:0043572	GO:0043572	17	21.175	29	9907	13568	0.802832	-0.31683	0.0659728	0.654869		depleted	not_significant
GO	Core	GO:0000118	GO:0000118	15	18.9845	26	9907	13568	0.790117	-0.339861	0.0659128	0.654869		depleted	not_significant
GO	Core	GO:0004536	GO:0004536	15	18.9845	26	9907	13568	0.790117	-0.339861	0.0659128	0.654869		depleted	not_significant
GO	Core	GO:0016278	GO:0016278	15	18.9845	26	9907	13568	0.790117	-0.339861	0.0659128	0.654869		depleted	not_significant
GO	Core	GO:0016279	GO:0016279	15	18.9845	26	9907	13568	0.790117	-0.339861	0.0659128	0.654869		depleted	not_significant
GO	Core	GO:0030141	GO:0030141	15	18.9845	26	9907	13568	0.790117	-0.339861	0.0659128	0.654869		depleted	not_significant
GO	Core	GO:0051156	GO:0051156	15	18.9845	26	9907	13568	0.790117	-0.339861	0.0659128	0.654869		depleted	not_significant
GO	Core	GO:2000069	GO:2000069	15	18.9845	26	9907	13568	0.790117	-0.339861	0.0659128	0.654869		depleted	not_significant
GO	Core	GO:0006084	GO:0006084	14	10.9526	15	9907	13568	1.27823	0.354152	0.0584053	0.654869		enriched	not_significant
GO	Core	GO:0009700	GO:0009700	14	10.9526	15	9907	13568	1.27823	0.354152	0.0584053	0.654869		enriched	not_significant
GO	Core	GO:0009768	GO:0009768	14	10.9526	15	9907	13568	1.27823	0.354152	0.0584053	0.654869		enriched	not_significant
GO	Core	GO:0010120	GO:0010120	14	10.9526	15	9907	13568	1.27823	0.354152	0.0584053	0.654869		enriched	not_significant
GO	Core	GO:0016307	GO:0016307	14	10.9526	15	9907	13568	1.27823	0.354152	0.0584053	0.654869		enriched	not_significant
GO	Core	GO:0046217	GO:0046217	14	10.9526	15	9907	13568	1.27823	0.354152	0.0584053	0.654869		enriched	not_significant
GO	Core	GO:0048441	GO:0048441	14	10.9526	15	9907	13568	1.27823	0.354152	0.0584053	0.654869		enriched	not_significant
GO	Core	GO:0048465	GO:0048465	14	10.9526	15	9907	13568	1.27823	0.354152	0.0584053	0.654869		enriched	not_significant
GO	Core	GO:0052317	GO:0052317	14	10.9526	15	9907	13568	1.27823	0.354152	0.0584053	0.654869		enriched	not_significant
GO	Core	GO:0071484	GO:0071484	14	10.9526	15	9907	13568	1.27823	0.354152	0.0584053	0.654869		enriched	not_significant
GO	Core	GO:0034212	GO:0034212	13	16.794	23	9907	13568	0.774086	-0.369434	0.065205	0.654869		depleted	not_significant
GO	Core	GO:0046164	GO:0046164	13	16.794	23	9907	13568	0.774086	-0.369434	0.065205	0.654869		depleted	not_significant
GO	Core	GO:0052866	GO:0052866	13	16.794	23	9907	13568	0.774086	-0.369434	0.065205	0.654869		depleted	not_significant
GO	Core	GO:0010496	GO:0010496	11	14.6035	20	9907	13568	0.753245	-0.408809	0.0635994	0.654869		depleted	not_significant
GO	Core	GO:0018024	GO:0018024	11	14.6035	20	9907	13568	0.753245	-0.408809	0.0635994	0.654869		depleted	not_significant
GO	Core	GO:0071025	GO:0071025	11	14.6035	20	9907	13568	0.753245	-0.408809	0.0635994	0.654869		depleted	not_significant
GO	Core	GO:0004535	GO:0004535	9	6.5716	9	9907	13568	1.36954	0.453688	0.0589401	0.654869		enriched	not_significant
GO	Core	GO:0006110	GO:0006110	9	6.5716	9	9907	13568	1.36954	0.453688	0.0589401	0.654869		enriched	not_significant
GO	Core	GO:0010981	GO:0010981	9	6.5716	9	9907	13568	1.36954	0.453688	0.0589401	0.654869		enriched	not_significant
GO	Core	GO:0016241	GO:0016241	9	6.5716	9	9907	13568	1.36954	0.453688	0.0589401	0.654869		enriched	not_significant
GO	Core	GO:0030811	GO:0030811	9	6.5716	9	9907	13568	1.36954	0.453688	0.0589401	0.654869		enriched	not_significant
GO	Core	GO:0032507	GO:0032507	9	12.413	17	9907	13568	0.725049	-0.46385	0.060732	0.654869		depleted	not_significant
GO	Core	GO:0043230	GO:0043230	9	12.413	17	9907	13568	0.725049	-0.46385	0.060732	0.654869		depleted	not_significant
GO	Core	GO:0043470	GO:0043470	9	6.5716	9	9907	13568	1.36954	0.453688	0.0589401	0.654869		enriched	not_significant
GO	Core	GO:0044665	GO:0044665	9	12.413	17	9907	13568	0.725049	-0.46385	0.060732	0.654869		depleted	not_significant
GO	Core	GO:0045185	GO:0045185	9	12.413	17	9907	13568	0.725049	-0.46385	0.060732	0.654869		depleted	not_significant
GO	Core	GO:0046365	GO:0046365	9	12.413	17	9907	13568	0.725049	-0.46385	0.060732	0.654869		depleted	not_significant
GO	Core	GO:0070062	GO:0070062	9	12.413	17	9907	13568	0.725049	-0.46385	0.060732	0.654869		depleted	not_significant
GO	Core	GO:0070734	GO:0070734	9	12.413	17	9907	13568	0.725049	-0.46385	0.060732	0.654869		depleted	not_significant
GO	Core	GO:0071326	GO:0071326	9	12.413	17	9907	13568	0.725049	-0.46385	0.060732	0.654869		depleted	not_significant
GO	Core	GO:0071331	GO:0071331	9	12.413	17	9907	13568	0.725049	-0.46385	0.060732	0.654869		depleted	not_significant
GO	Core	GO:0071333	GO:0071333	9	12.413	17	9907	13568	0.725049	-0.46385	0.060732	0.654869		depleted	not_significant
GO	Core	GO:0071339	GO:0071339	9	12.413	17	9907	13568	0.725049	-0.46385	0.060732	0.654869		depleted	not_significant
GO	Core	GO:1903561	GO:1903561	9	12.413	17	9907	13568	0.725049	-0.46385	0.060732	0.654869		depleted	not_significant
GO	Core	GO:0001819	GO:0001819	7	10.2224	14	9907	13568	0.684768	-0.546312	0.0560589	0.654869		depleted	not_significant
GO	Core	GO:0009130	GO:0009130	7	10.2224	14	9907	13568	0.684768	-0.546312	0.0560589	0.654869		depleted	not_significant
GO	Core	GO:0010204	GO:0010204	7	10.2224	14	9907	13568	0.684768	-0.546312	0.0560589	0.654869		depleted	not_significant
GO	Core	GO:0010976	GO:0010976	7	10.2224	14	9907	13568	0.684768	-0.546312	0.0560589	0.654869		depleted	not_significant
GO	Core	GO:0015299	GO:0015299	7	10.2224	14	9907	13568	0.684768	-0.546312	0.0560589	0.654869		depleted	not_significant
GO	Core	GO:0015491	GO:0015491	7	10.2224	14	9907	13568	0.684768	-0.546312	0.0560589	0.654869		depleted	not_significant
GO	Core	GO:0016838	GO:0016838	7	10.2224	14	9907	13568	0.684768	-0.546312	0.0560589	0.654869		depleted	not_significant
GO	Core	GO:0032781	GO:0032781	7	10.2224	14	9907	13568	0.684768	-0.546312	0.0560589	0.654869		depleted	not_significant
GO	Core	GO:0033558	GO:0033558	7	10.2224	14	9907	13568	0.684768	-0.546312	0.0560589	0.654869		depleted	not_significant
GO	Core	GO:0061912	GO:0061912	7	10.2224	14	9907	13568	0.684768	-0.546312	0.0560589	0.654869		depleted	not_significant
GO	Core	GO:0071028	GO:0071028	7	10.2224	14	9907	13568	0.684768	-0.546312	0.0560589	0.654869		depleted	not_significant
GO	Core	GO:0004029	GO:0004029	4	6.5716	9	9907	13568	0.608683	-0.716237	0.0659731	0.654869		depleted	not_significant
GO	Core	GO:0005775	GO:0005775	4	6.5716	9	9907	13568	0.608683	-0.716237	0.0659731	0.654869		depleted	not_significant
GO	Core	GO:0005793	GO:0005793	4	6.5716	9	9907	13568	0.608683	-0.716237	0.0659731	0.654869		depleted	not_significant
GO	Core	GO:0006273	GO:0006273	4	6.5716	9	9907	13568	0.608683	-0.716237	0.0659731	0.654869		depleted	not_significant
GO	Core	GO:0008641	GO:0008641	4	6.5716	9	9907	13568	0.608683	-0.716237	0.0659731	0.654869		depleted	not_significant
GO	Core	GO:0010387	GO:0010387	4	6.5716	9	9907	13568	0.608683	-0.716237	0.0659731	0.654869		depleted	not_significant
GO	Core	GO:0015136	GO:0015136	4	6.5716	9	9907	13568	0.608683	-0.716237	0.0659731	0.654869		depleted	not_significant
GO	Core	GO:0015739	GO:0015739	4	6.5716	9	9907	13568	0.608683	-0.716237	0.0659731	0.654869		depleted	not_significant
GO	Core	GO:0016247	GO:0016247	4	6.5716	9	9907	13568	0.608683	-0.716237	0.0659731	0.654869		depleted	not_significant
GO	Core	GO:0016530	GO:0016530	4	6.5716	9	9907	13568	0.608683	-0.716237	0.0659731	0.654869		depleted	not_significant
GO	Core	GO:0016553	GO:0016553	4	6.5716	9	9907	13568	0.608683	-0.716237	0.0659731	0.654869		depleted	not_significant
GO	Core	GO:0030667	GO:0030667	4	6.5716	9	9907	13568	0.608683	-0.716237	0.0659731	0.654869		depleted	not_significant
GO	Core	GO:0042939	GO:0042939	4	6.5716	9	9907	13568	0.608683	-0.716237	0.0659731	0.654869		depleted	not_significant
GO	Core	GO:0048027	GO:0048027	4	6.5716	9	9907	13568	0.608683	-0.716237	0.0659731	0.654869		depleted	not_significant
GO	Core	GO:0048546	GO:0048546	4	6.5716	9	9907	13568	0.608683	-0.716237	0.0659731	0.654869		depleted	not_significant
GO	Core	GO:0000012	GO:0000012	1	2.9207	4	9907	13568	0.342384	-1.54631	0.0626498	0.654869		depleted	not_significant
GO	Core	GO:0000331	GO:0000331	1	2.9207	4	9907	13568	0.342384	-1.54631	0.0626498	0.654869		depleted	not_significant
GO	Core	GO:0000733	GO:0000733	1	2.9207	4	9907	13568	0.342384	-1.54631	0.0626498	0.654869		depleted	not_significant
GO	Core	GO:0003844	GO:0003844	1	2.9207	4	9907	13568	0.342384	-1.54631	0.0626498	0.654869		depleted	not_significant
GO	Core	GO:0004845	GO:0004845	1	2.9207	4	9907	13568	0.342384	-1.54631	0.0626498	0.654869		depleted	not_significant
GO	Core	GO:0005712	GO:0005712	1	2.9207	4	9907	13568	0.342384	-1.54631	0.0626498	0.654869		depleted	not_significant
GO	Core	GO:0006384	GO:0006384	1	2.9207	4	9907	13568	0.342384	-1.54631	0.0626498	0.654869		depleted	not_significant
GO	Core	GO:0006432	GO:0006432	1	2.9207	4	9907	13568	0.342384	-1.54631	0.0626498	0.654869		depleted	not_significant
GO	Core	GO:0006569	GO:0006569	1	2.9207	4	9907	13568	0.342384	-1.54631	0.0626498	0.654869		depleted	not_significant
GO	Core	GO:0006627	GO:0006627	1	2.9207	4	9907	13568	0.342384	-1.54631	0.0626498	0.654869		depleted	not_significant
GO	Core	GO:0008206	GO:0008206	1	2.9207	4	9907	13568	0.342384	-1.54631	0.0626498	0.654869		depleted	not_significant
GO	Core	GO:0008381	GO:0008381	1	2.9207	4	9907	13568	0.342384	-1.54631	0.0626498	0.654869		depleted	not_significant
GO	Core	GO:0008535	GO:0008535	1	2.9207	4	9907	13568	0.342384	-1.54631	0.0626498	0.654869		depleted	not_significant
GO	Core	GO:0008622	GO:0008622	1	2.9207	4	9907	13568	0.342384	-1.54631	0.0626498	0.654869		depleted	not_significant
GO	Core	GO:0009759	GO:0009759	1	2.9207	4	9907	13568	0.342384	-1.54631	0.0626498	0.654869		depleted	not_significant
GO	Core	GO:0009859	GO:0009859	1	2.9207	4	9907	13568	0.342384	-1.54631	0.0626498	0.654869		depleted	not_significant
GO	Core	GO:0009899	GO:0009899	1	2.9207	4	9907	13568	0.342384	-1.54631	0.0626498	0.654869		depleted	not_significant
GO	Core	GO:0010314	GO:0010314	1	2.9207	4	9907	13568	0.342384	-1.54631	0.0626498	0.654869		depleted	not_significant
GO	Core	GO:0010326	GO:0010326	1	2.9207	4	9907	13568	0.342384	-1.54631	0.0626498	0.654869		depleted	not_significant
GO	Core	GO:0010395	GO:0010395	1	2.9207	4	9907	13568	0.342384	-1.54631	0.0626498	0.654869		depleted	not_significant
GO	Core	GO:0010400	GO:0010400	1	2.9207	4	9907	13568	0.342384	-1.54631	0.0626498	0.654869		depleted	not_significant
GO	Core	GO:0016262	GO:0016262	1	2.9207	4	9907	13568	0.342384	-1.54631	0.0626498	0.654869		depleted	not_significant
GO	Core	GO:0033617	GO:0033617	1	2.9207	4	9907	13568	0.342384	-1.54631	0.0626498	0.654869		depleted	not_significant
GO	Core	GO:0034098	GO:0034098	1	2.9207	4	9907	13568	0.342384	-1.54631	0.0626498	0.654869		depleted	not_significant
GO	Core	GO:0034274	GO:0034274	1	2.9207	4	9907	13568	0.342384	-1.54631	0.0626498	0.654869		depleted	not_significant
GO	Core	GO:0034982	GO:0034982	1	2.9207	4	9907	13568	0.342384	-1.54631	0.0626498	0.654869		depleted	not_significant
GO	Core	GO:0035241	GO:0035241	1	2.9207	4	9907	13568	0.342384	-1.54631	0.0626498	0.654869		depleted	not_significant
GO	Core	GO:0035513	GO:0035513	1	2.9207	4	9907	13568	0.342384	-1.54631	0.0626498	0.654869		depleted	not_significant
GO	Core	GO:0035515	GO:0035515	1	2.9207	4	9907	13568	0.342384	-1.54631	0.0626498	0.654869		depleted	not_significant
GO	Core	GO:0036257	GO:0036257	1	2.9207	4	9907	13568	0.342384	-1.54631	0.0626498	0.654869		depleted	not_significant
GO	Core	GO:0036310	GO:0036310	1	2.9207	4	9907	13568	0.342384	-1.54631	0.0626498	0.654869		depleted	not_significant
GO	Core	GO:0039531	GO:0039531	1	2.9207	4	9907	13568	0.342384	-1.54631	0.0626498	0.654869		depleted	not_significant
GO	Core	GO:0039535	GO:0039535	1	2.9207	4	9907	13568	0.342384	-1.54631	0.0626498	0.654869		depleted	not_significant
GO	Core	GO:0045022	GO:0045022	1	2.9207	4	9907	13568	0.342384	-1.54631	0.0626498	0.654869		depleted	not_significant
GO	Core	GO:0045048	GO:0045048	1	2.9207	4	9907	13568	0.342384	-1.54631	0.0626498	0.654869		depleted	not_significant
GO	Core	GO:0045548	GO:0045548	1	2.9207	4	9907	13568	0.342384	-1.54631	0.0626498	0.654869		depleted	not_significant
GO	Core	GO:0045879	GO:0045879	1	2.9207	4	9907	13568	0.342384	-1.54631	0.0626498	0.654869		depleted	not_significant
GO	Core	GO:0046218	GO:0046218	1	2.9207	4	9907	13568	0.342384	-1.54631	0.0626498	0.654869		depleted	not_significant
GO	Core	GO:0046660	GO:0046660	1	2.9207	4	9907	13568	0.342384	-1.54631	0.0626498	0.654869		depleted	not_significant
GO	Core	GO:0046900	GO:0046900	1	2.9207	4	9907	13568	0.342384	-1.54631	0.0626498	0.654869		depleted	not_significant
GO	Core	GO:0047724	GO:0047724	1	2.9207	4	9907	13568	0.342384	-1.54631	0.0626498	0.654869		depleted	not_significant
GO	Core	GO:0048478	GO:0048478	1	2.9207	4	9907	13568	0.342384	-1.54631	0.0626498	0.654869		depleted	not_significant
GO	Core	GO:0048806	GO:0048806	1	2.9207	4	9907	13568	0.342384	-1.54631	0.0626498	0.654869		depleted	not_significant
GO	Core	GO:0051205	GO:0051205	1	2.9207	4	9907	13568	0.342384	-1.54631	0.0626498	0.654869		depleted	not_significant
GO	Core	GO:0070498	GO:0070498	1	2.9207	4	9907	13568	0.342384	-1.54631	0.0626498	0.654869		depleted	not_significant
GO	Core	GO:0071347	GO:0071347	1	2.9207	4	9907	13568	0.342384	-1.54631	0.0626498	0.654869		depleted	not_significant
GO	Core	GO:0071816	GO:0071816	1	2.9207	4	9907	13568	0.342384	-1.54631	0.0626498	0.654869		depleted	not_significant
GO	Core	GO:0072349	GO:0072349	1	2.9207	4	9907	13568	0.342384	-1.54631	0.0626498	0.654869		depleted	not_significant
GO	Core	GO:0090213	GO:0090213	1	2.9207	4	9907	13568	0.342384	-1.54631	0.0626498	0.654869		depleted	not_significant
GO	Core	GO:0097617	GO:0097617	1	2.9207	4	9907	13568	0.342384	-1.54631	0.0626498	0.654869		depleted	not_significant
GO	Core	GO:0098927	GO:0098927	1	2.9207	4	9907	13568	0.342384	-1.54631	0.0626498	0.654869		depleted	not_significant
GO	Core	GO:2000772	GO:2000772	1	2.9207	4	9907	13568	0.342384	-1.54631	0.0626498	0.654869		depleted	not_significant
GO	Core	GO:2001224	GO:2001224	1	2.9207	4	9907	13568	0.342384	-1.54631	0.0626498	0.654869		depleted	not_significant
GO	Core	GO:0006807	GO:0006807	3509	3545.72	4856	9907	13568	0.989643	-0.015021	0.0720677	0.655099		depleted	not_significant
GO	Core	GO:0006725	GO:0006725	1809	1839.31	2519	9907	13568	0.983522	-0.023971	0.0694442	0.655099		depleted	not_significant
GO	Core	GO:0090304	GO:0090304	1318	1344.98	1842	9907	13568	0.97994	-0.029235	0.0679193	0.655099		depleted	not_significant
GO	Core	GO:0043207	GO:0043207	752	731.634	1002	9907	13568	1.02784	0.03961	0.0700962	0.655099		enriched	not_significant
GO	Core	GO:0010035	GO:0010035	749	728.714	998	9907	13568	1.02784	0.039614	0.0705275	0.655099		enriched	not_significant
GO	Core	GO:0034660	GO:0034660	223	235.116	322	9907	13568	0.948468	-0.076329	0.0713226	0.655099		depleted	not_significant
GO	Core	GO:0009505	GO:0009505	197	186.194	255	9907	13568	1.05803	0.081386	0.0692629	0.655099		enriched	not_significant
GO	Core	GO:0060089	GO:0060089	191	180.353	247	9907	13568	1.05903	0.08275	0.0692034	0.655099		enriched	not_significant
GO	Core	GO:0007017	GO:0007017	147	156.987	215	9907	13568	0.936381	-0.094833	0.0724944	0.655099		depleted	not_significant
GO	Core	GO:0000785	GO:0000785	115	124.13	170	9907	13568	0.926451	-0.110213	0.0686171	0.655099		depleted	not_significant
GO	Core	GO:0071365	GO:0071365	93	85.4304	117	9907	13568	1.08861	0.122482	0.0667012	0.655099		enriched	not_significant
GO	Core	GO:0007059	GO:0007059	80	87.6209	120	9907	13568	0.913024	-0.131275	0.0727824	0.655099		depleted	not_significant
GO	Core	GO:0009734	GO:0009734	80	73.0174	100	9907	13568	1.09563	0.13176	0.0682168	0.655099		enriched	not_significant
GO	Core	GO:0010565	GO:0010565	77	70.0967	96	9907	13568	1.09848	0.135512	0.0665197	0.655099		enriched	not_significant
GO	Core	GO:0051259	GO:0051259	77	70.0967	96	9907	13568	1.09848	0.135512	0.0665197	0.655099		enriched	not_significant
GO	Core	GO:0003712	GO:0003712	73	66.4458	91	9907	13568	1.09864	0.135718	0.0725138	0.655099		enriched	not_significant
GO	Core	GO:0015980	GO:0015980	73	80.3191	110	9907	13568	0.908874	-0.137847	0.0728987	0.655099		depleted	not_significant
GO	Core	GO:0009124	GO:0009124	66	73.0174	100	9907	13568	0.903894	-0.145774	0.0725987	0.655099		depleted	not_significant
GO	Core	GO:0044421	GO:0044421	66	73.0174	100	9907	13568	0.903894	-0.145774	0.0725987	0.655099		depleted	not_significant
GO	Core	GO:0045859	GO:0045859	66	73.0174	100	9907	13568	0.903894	-0.145774	0.0725987	0.655099		depleted	not_significant
GO	Core	GO:0042255	GO:0042255	60	54.0329	74	9907	13568	1.11044	0.151125	0.0719329	0.655099		enriched	not_significant
GO	Core	GO:0030036	GO:0030036	50	56.2234	77	9907	13568	0.88931	-0.169242	0.0728928	0.655099		depleted	not_significant
GO	Core	GO:0032970	GO:0032970	45	51.1122	70	9907	13568	0.880416	-0.183742	0.0676888	0.655099		depleted	not_significant
GO	Core	GO:0015036	GO:0015036	41	46.7311	64	9907	13568	0.877359	-0.18876	0.0727072	0.655099		depleted	not_significant
GO	Core	GO:0015629	GO:0015629	41	46.7311	64	9907	13568	0.877359	-0.18876	0.0727072	0.655099		depleted	not_significant
GO	Core	GO:0033612	GO:0033612	40	35.0483	48	9907	13568	1.14128	0.190654	0.0687297	0.655099		enriched	not_significant
GO	Core	GO:0043021	GO:0043021	32	37.2389	51	9907	13568	0.859317	-0.218737	0.070258	0.655099		depleted	not_significant
GO	Core	GO:0005372	GO:0005372	29	24.8259	34	9907	13568	1.16813	0.224206	0.0718887	0.655099		enriched	not_significant
GO	Core	GO:0015250	GO:0015250	29	24.8259	34	9907	13568	1.16813	0.224206	0.0718887	0.655099		enriched	not_significant
GO	Core	GO:0097164	GO:0097164	29	24.8259	34	9907	13568	1.16813	0.224206	0.0718887	0.655099		enriched	not_significant
GO	Core	GO:0000011	GO:0000011	0	1.4603	2	9907	13568	0		0.0727916	0.655099		depleted	not_significant
GO	Core	GO:0000025	GO:0000025	0	1.4603	2	9907	13568	0		0.0727916	0.655099		depleted	not_significant
GO	Core	GO:0000099	GO:0000099	0	1.4603	2	9907	13568	0		0.0727916	0.655099		depleted	not_significant
GO	Core	GO:0000101	GO:0000101	0	1.4603	2	9907	13568	0		0.0727916	0.655099		depleted	not_significant
GO	Core	GO:0000438	GO:0000438	0	1.4603	2	9907	13568	0		0.0727916	0.655099		depleted	not_significant
GO	Core	GO:0000494	GO:0000494	0	1.4603	2	9907	13568	0		0.0727916	0.655099		depleted	not_significant
GO	Core	GO:0000799	GO:0000799	0	1.4603	2	9907	13568	0		0.0727916	0.655099		depleted	not_significant
GO	Core	GO:0000825	GO:0000825	0	1.4603	2	9907	13568	0		0.0727916	0.655099		depleted	not_significant
GO	Core	GO:0001129	GO:0001129	0	1.4603	2	9907	13568	0		0.0727916	0.655099		depleted	not_significant
GO	Core	GO:0001132	GO:0001132	0	1.4603	2	9907	13568	0		0.0727916	0.655099		depleted	not_significant
GO	Core	GO:0001561	GO:0001561	0	1.4603	2	9907	13568	0		0.0727916	0.655099		depleted	not_significant
GO	Core	GO:0001732	GO:0001732	0	1.4603	2	9907	13568	0		0.0727916	0.655099		depleted	not_significant
GO	Core	GO:0001789	GO:0001789	0	1.4603	2	9907	13568	0		0.0727916	0.655099		depleted	not_significant
GO	Core	GO:0003881	GO:0003881	0	1.4603	2	9907	13568	0		0.0727916	0.655099		depleted	not_significant
GO	Core	GO:0004134	GO:0004134	0	1.4603	2	9907	13568	0		0.0727916	0.655099		depleted	not_significant
GO	Core	GO:0004322	GO:0004322	0	1.4603	2	9907	13568	0		0.0727916	0.655099		depleted	not_significant
GO	Core	GO:0004350	GO:0004350	0	1.4603	2	9907	13568	0		0.0727916	0.655099		depleted	not_significant
GO	Core	GO:0004516	GO:0004516	0	1.4603	2	9907	13568	0		0.0727916	0.655099		depleted	not_significant
GO	Core	GO:0004666	GO:0004666	0	1.4603	2	9907	13568	0		0.0727916	0.655099		depleted	not_significant
GO	Core	GO:0004729	GO:0004729	0	1.4603	2	9907	13568	0		0.0727916	0.655099		depleted	not_significant
GO	Core	GO:0004735	GO:0004735	0	1.4603	2	9907	13568	0		0.0727916	0.655099		depleted	not_significant
GO	Core	GO:0004830	GO:0004830	0	1.4603	2	9907	13568	0		0.0727916	0.655099		depleted	not_significant
GO	Core	GO:0005223	GO:0005223	0	1.4603	2	9907	13568	0		0.0727916	0.655099		depleted	not_significant
GO	Core	GO:0006218	GO:0006218	0	1.4603	2	9907	13568	0		0.0727916	0.655099		depleted	not_significant
GO	Core	GO:0006390	GO:0006390	0	1.4603	2	9907	13568	0		0.0727916	0.655099		depleted	not_significant
GO	Core	GO:0006436	GO:0006436	0	1.4603	2	9907	13568	0		0.0727916	0.655099		depleted	not_significant
GO	Core	GO:0006617	GO:0006617	0	1.4603	2	9907	13568	0		0.0727916	0.655099		depleted	not_significant
GO	Core	GO:0006642	GO:0006642	0	1.4603	2	9907	13568	0		0.0727916	0.655099		depleted	not_significant
GO	Core	GO:0007219	GO:0007219	0	1.4603	2	9907	13568	0		0.0727916	0.655099		depleted	not_significant
GO	Core	GO:0007289	GO:0007289	0	1.4603	2	9907	13568	0		0.0727916	0.655099		depleted	not_significant
GO	Core	GO:0008124	GO:0008124	0	1.4603	2	9907	13568	0		0.0727916	0.655099		depleted	not_significant
GO	Core	GO:0008309	GO:0008309	0	1.4603	2	9907	13568	0		0.0727916	0.655099		depleted	not_significant
GO	Core	GO:0008311	GO:0008311	0	1.4603	2	9907	13568	0		0.0727916	0.655099		depleted	not_significant
GO	Core	GO:0008922	GO:0008922	0	1.4603	2	9907	13568	0		0.0727916	0.655099		depleted	not_significant
GO	Core	GO:0009328	GO:0009328	0	1.4603	2	9907	13568	0		0.0727916	0.655099		depleted	not_significant
GO	Core	GO:0010138	GO:0010138	0	1.4603	2	9907	13568	0		0.0727916	0.655099		depleted	not_significant
GO	Core	GO:0010168	GO:0010168	0	1.4603	2	9907	13568	0		0.0727916	0.655099		depleted	not_significant
GO	Core	GO:0010210	GO:0010210	0	1.4603	2	9907	13568	0		0.0727916	0.655099		depleted	not_significant
GO	Core	GO:0010211	GO:0010211	0	1.4603	2	9907	13568	0		0.0727916	0.655099		depleted	not_significant
GO	Core	GO:0010401	GO:0010401	0	1.4603	2	9907	13568	0		0.0727916	0.655099		depleted	not_significant
GO	Core	GO:0010484	GO:0010484	0	1.4603	2	9907	13568	0		0.0727916	0.655099		depleted	not_significant
GO	Core	GO:0010911	GO:0010911	0	1.4603	2	9907	13568	0		0.0727916	0.655099		depleted	not_significant
GO	Core	GO:0010912	GO:0010912	0	1.4603	2	9907	13568	0		0.0727916	0.655099		depleted	not_significant
GO	Core	GO:0015184	GO:0015184	0	1.4603	2	9907	13568	0		0.0727916	0.655099		depleted	not_significant
GO	Core	GO:0015811	GO:0015811	0	1.4603	2	9907	13568	0		0.0727916	0.655099		depleted	not_significant
GO	Core	GO:0015918	GO:0015918	0	1.4603	2	9907	13568	0		0.0727916	0.655099		depleted	not_significant
GO	Core	GO:0016034	GO:0016034	0	1.4603	2	9907	13568	0		0.0727916	0.655099		depleted	not_significant
GO	Core	GO:0016421	GO:0016421	0	1.4603	2	9907	13568	0		0.0727916	0.655099		depleted	not_significant
GO	Core	GO:0016724	GO:0016724	0	1.4603	2	9907	13568	0		0.0727916	0.655099		depleted	not_significant
GO	Core	GO:0016885	GO:0016885	0	1.4603	2	9907	13568	0		0.0727916	0.655099		depleted	not_significant
GO	Core	GO:0017049	GO:0017049	0	1.4603	2	9907	13568	0		0.0727916	0.655099		depleted	not_significant
GO	Core	GO:0017084	GO:0017084	0	1.4603	2	9907	13568	0		0.0727916	0.655099		depleted	not_significant
GO	Core	GO:0017113	GO:0017113	0	1.4603	2	9907	13568	0		0.0727916	0.655099		depleted	not_significant
GO	Core	GO:0018282	GO:0018282	0	1.4603	2	9907	13568	0		0.0727916	0.655099		depleted	not_significant
GO	Core	GO:0018283	GO:0018283	0	1.4603	2	9907	13568	0		0.0727916	0.655099		depleted	not_significant
GO	Core	GO:0018401	GO:0018401	0	1.4603	2	9907	13568	0		0.0727916	0.655099		depleted	not_significant
GO	Core	GO:0018454	GO:0018454	0	1.4603	2	9907	13568	0		0.0727916	0.655099		depleted	not_significant
GO	Core	GO:0019371	GO:0019371	0	1.4603	2	9907	13568	0		0.0727916	0.655099		depleted	not_significant
GO	Core	GO:0019471	GO:0019471	0	1.4603	2	9907	13568	0		0.0727916	0.655099		depleted	not_significant
GO	Core	GO:0019948	GO:0019948	0	1.4603	2	9907	13568	0		0.0727916	0.655099		depleted	not_significant
GO	Core	GO:0021895	GO:0021895	0	1.4603	2	9907	13568	0		0.0727916	0.655099		depleted	not_significant
GO	Core	GO:0030301	GO:0030301	0	1.4603	2	9907	13568	0		0.0727916	0.655099		depleted	not_significant
GO	Core	GO:0030385	GO:0030385	0	1.4603	2	9907	13568	0		0.0727916	0.655099		depleted	not_significant
GO	Core	GO:0030539	GO:0030539	0	1.4603	2	9907	13568	0		0.0727916	0.655099		depleted	not_significant
GO	Core	GO:0031285	GO:0031285	0	1.4603	2	9907	13568	0		0.0727916	0.655099		depleted	not_significant
GO	Core	GO:0031286	GO:0031286	0	1.4603	2	9907	13568	0		0.0727916	0.655099		depleted	not_significant
GO	Core	GO:0031288	GO:0031288	0	1.4603	2	9907	13568	0		0.0727916	0.655099		depleted	not_significant
GO	Core	GO:0031416	GO:0031416	0	1.4603	2	9907	13568	0		0.0727916	0.655099		depleted	not_significant
GO	Core	GO:0032105	GO:0032105	0	1.4603	2	9907	13568	0		0.0727916	0.655099		depleted	not_significant
GO	Core	GO:0032108	GO:0032108	0	1.4603	2	9907	13568	0		0.0727916	0.655099		depleted	not_significant
GO	Core	GO:0032262	GO:0032262	0	1.4603	2	9907	13568	0		0.0727916	0.655099		depleted	not_significant
GO	Core	GO:0032429	GO:0032429	0	1.4603	2	9907	13568	0		0.0727916	0.655099		depleted	not_significant
GO	Core	GO:0032430	GO:0032430	0	1.4603	2	9907	13568	0		0.0727916	0.655099		depleted	not_significant
GO	Core	GO:0032925	GO:0032925	0	1.4603	2	9907	13568	0		0.0727916	0.655099		depleted	not_significant
GO	Core	GO:0032926	GO:0032926	0	1.4603	2	9907	13568	0		0.0727916	0.655099		depleted	not_significant
GO	Core	GO:0033231	GO:0033231	0	1.4603	2	9907	13568	0		0.0727916	0.655099		depleted	not_significant
GO	Core	GO:0033919	GO:0033919	0	1.4603	2	9907	13568	0		0.0727916	0.655099		depleted	not_significant
GO	Core	GO:0033967	GO:0033967	0	1.4603	2	9907	13568	0		0.0727916	0.655099		depleted	not_significant
GO	Core	GO:0034245	GO:0034245	0	1.4603	2	9907	13568	0		0.0727916	0.655099		depleted	not_significant
GO	Core	GO:0034402	GO:0034402	0	1.4603	2	9907	13568	0		0.0727916	0.655099		depleted	not_significant
GO	Core	GO:0034963	GO:0034963	0	1.4603	2	9907	13568	0		0.0727916	0.655099		depleted	not_significant
GO	Core	GO:0034986	GO:0034986	0	1.4603	2	9907	13568	0		0.0727916	0.655099		depleted	not_significant
GO	Core	GO:0035092	GO:0035092	0	1.4603	2	9907	13568	0		0.0727916	0.655099		depleted	not_significant
GO	Core	GO:0035093	GO:0035093	0	1.4603	2	9907	13568	0		0.0727916	0.655099		depleted	not_significant
GO	Core	GO:0035562	GO:0035562	0	1.4603	2	9907	13568	0		0.0727916	0.655099		depleted	not_significant
GO	Core	GO:0036009	GO:0036009	0	1.4603	2	9907	13568	0		0.0727916	0.655099		depleted	not_significant
GO	Core	GO:0043182	GO:0043182	0	1.4603	2	9907	13568	0		0.0727916	0.655099		depleted	not_significant
GO	Core	GO:0043576	GO:0043576	0	1.4603	2	9907	13568	0		0.0727916	0.655099		depleted	not_significant
GO	Core	GO:0043949	GO:0043949	0	1.4603	2	9907	13568	0		0.0727916	0.655099		depleted	not_significant
GO	Core	GO:0043951	GO:0043951	0	1.4603	2	9907	13568	0		0.0727916	0.655099		depleted	not_significant
GO	Core	GO:0044206	GO:0044206	0	1.4603	2	9907	13568	0		0.0727916	0.655099		depleted	not_significant
GO	Core	GO:0044547	GO:0044547	0	1.4603	2	9907	13568	0		0.0727916	0.655099		depleted	not_significant
GO	Core	GO:0045437	GO:0045437	0	1.4603	2	9907	13568	0		0.0727916	0.655099		depleted	not_significant
GO	Core	GO:0045472	GO:0045472	0	1.4603	2	9907	13568	0		0.0727916	0.655099		depleted	not_significant
GO	Core	GO:0045552	GO:0045552	0	1.4603	2	9907	13568	0		0.0727916	0.655099		depleted	not_significant
GO	Core	GO:0045638	GO:0045638	0	1.4603	2	9907	13568	0		0.0727916	0.655099		depleted	not_significant
GO	Core	GO:0045744	GO:0045744	0	1.4603	2	9907	13568	0		0.0727916	0.655099		depleted	not_significant
GO	Core	GO:0045881	GO:0045881	0	1.4603	2	9907	13568	0		0.0727916	0.655099		depleted	not_significant
GO	Core	GO:0046437	GO:0046437	0	1.4603	2	9907	13568	0		0.0727916	0.655099		depleted	not_significant
GO	Core	GO:0046522	GO:0046522	0	1.4603	2	9907	13568	0		0.0727916	0.655099		depleted	not_significant
GO	Core	GO:0046661	GO:0046661	0	1.4603	2	9907	13568	0		0.0727916	0.655099		depleted	not_significant
GO	Core	GO:0046974	GO:0046974	0	1.4603	2	9907	13568	0		0.0727916	0.655099		depleted	not_significant
GO	Core	GO:0047622	GO:0047622	0	1.4603	2	9907	13568	0		0.0727916	0.655099		depleted	not_significant
GO	Core	GO:0048032	GO:0048032	0	1.4603	2	9907	13568	0		0.0727916	0.655099		depleted	not_significant
GO	Core	GO:0048308	GO:0048308	0	1.4603	2	9907	13568	0		0.0727916	0.655099		depleted	not_significant
GO	Core	GO:0048483	GO:0048483	0	1.4603	2	9907	13568	0		0.0727916	0.655099		depleted	not_significant
GO	Core	GO:0048484	GO:0048484	0	1.4603	2	9907	13568	0		0.0727916	0.655099		depleted	not_significant
GO	Core	GO:0050263	GO:0050263	0	1.4603	2	9907	13568	0		0.0727916	0.655099		depleted	not_significant
GO	Core	GO:0051409	GO:0051409	0	1.4603	2	9907	13568	0		0.0727916	0.655099		depleted	not_significant
GO	Core	GO:0051717	GO:0051717	0	1.4603	2	9907	13568	0		0.0727916	0.655099		depleted	not_significant
GO	Core	GO:0052716	GO:0052716	0	1.4603	2	9907	13568	0		0.0727916	0.655099		depleted	not_significant
GO	Core	GO:0052739	GO:0052739	0	1.4603	2	9907	13568	0		0.0727916	0.655099		depleted	not_significant
GO	Core	GO:0052743	GO:0052743	0	1.4603	2	9907	13568	0		0.0727916	0.655099		depleted	not_significant
GO	Core	GO:0060850	GO:0060850	0	1.4603	2	9907	13568	0		0.0727916	0.655099		depleted	not_significant
GO	Core	GO:0061628	GO:0061628	0	1.4603	2	9907	13568	0		0.0727916	0.655099		depleted	not_significant
GO	Core	GO:0061709	GO:0061709	0	1.4603	2	9907	13568	0		0.0727916	0.655099		depleted	not_significant
GO	Core	GO:0070178	GO:0070178	0	1.4603	2	9907	13568	0		0.0727916	0.655099		depleted	not_significant
GO	Core	GO:0070179	GO:0070179	0	1.4603	2	9907	13568	0		0.0727916	0.655099		depleted	not_significant
GO	Core	GO:0070453	GO:0070453	0	1.4603	2	9907	13568	0		0.0727916	0.655099		depleted	not_significant
GO	Core	GO:0070455	GO:0070455	0	1.4603	2	9907	13568	0		0.0727916	0.655099		depleted	not_significant
GO	Core	GO:0070818	GO:0070818	0	1.4603	2	9907	13568	0		0.0727916	0.655099		depleted	not_significant
GO	Core	GO:0071475	GO:0071475	0	1.4603	2	9907	13568	0		0.0727916	0.655099		depleted	not_significant
GO	Core	GO:0071540	GO:0071540	0	1.4603	2	9907	13568	0		0.0727916	0.655099		depleted	not_significant
GO	Core	GO:0071566	GO:0071566	0	1.4603	2	9907	13568	0		0.0727916	0.655099		depleted	not_significant
GO	Core	GO:0071722	GO:0071722	0	1.4603	2	9907	13568	0		0.0727916	0.655099		depleted	not_significant
GO	Core	GO:0072585	GO:0072585	0	1.4603	2	9907	13568	0		0.0727916	0.655099		depleted	not_significant
GO	Core	GO:0072586	GO:0072586	0	1.4603	2	9907	13568	0		0.0727916	0.655099		depleted	not_significant
GO	Core	GO:0072587	GO:0072587	0	1.4603	2	9907	13568	0		0.0727916	0.655099		depleted	not_significant
GO	Core	GO:0075260	GO:0075260	0	1.4603	2	9907	13568	0		0.0727916	0.655099		depleted	not_significant
GO	Core	GO:0075262	GO:0075262	0	1.4603	2	9907	13568	0		0.0727916	0.655099		depleted	not_significant
GO	Core	GO:0090600	GO:0090600	0	1.4603	2	9907	13568	0		0.0727916	0.655099		depleted	not_significant
GO	Core	GO:0090617	GO:0090617	0	1.4603	2	9907	13568	0		0.0727916	0.655099		depleted	not_significant
GO	Core	GO:0090711	GO:0090711	0	1.4603	2	9907	13568	0		0.0727916	0.655099		depleted	not_significant
GO	Core	GO:1900044	GO:1900044	0	1.4603	2	9907	13568	0		0.0727916	0.655099		depleted	not_significant
GO	Core	GO:1900045	GO:1900045	0	1.4603	2	9907	13568	0		0.0727916	0.655099		depleted	not_significant
GO	Core	GO:1900107	GO:1900107	0	1.4603	2	9907	13568	0		0.0727916	0.655099		depleted	not_significant
GO	Core	GO:1900108	GO:1900108	0	1.4603	2	9907	13568	0		0.0727916	0.655099		depleted	not_significant
GO	Core	GO:1900145	GO:1900145	0	1.4603	2	9907	13568	0		0.0727916	0.655099		depleted	not_significant
GO	Core	GO:1900146	GO:1900146	0	1.4603	2	9907	13568	0		0.0727916	0.655099		depleted	not_significant
GO	Core	GO:1900175	GO:1900175	0	1.4603	2	9907	13568	0		0.0727916	0.655099		depleted	not_significant
GO	Core	GO:1900176	GO:1900176	0	1.4603	2	9907	13568	0		0.0727916	0.655099		depleted	not_significant
GO	Core	GO:1901798	GO:1901798	0	1.4603	2	9907	13568	0		0.0727916	0.655099		depleted	not_significant
GO	Core	GO:1901979	GO:1901979	0	1.4603	2	9907	13568	0		0.0727916	0.655099		depleted	not_significant
GO	Core	GO:1902185	GO:1902185	0	1.4603	2	9907	13568	0		0.0727916	0.655099		depleted	not_significant
GO	Core	GO:1902298	GO:1902298	0	1.4603	2	9907	13568	0		0.0727916	0.655099		depleted	not_significant
GO	Core	GO:1902478	GO:1902478	0	1.4603	2	9907	13568	0		0.0727916	0.655099		depleted	not_significant
GO	Core	GO:1902609	GO:1902609	0	1.4603	2	9907	13568	0		0.0727916	0.655099		depleted	not_significant
GO	Core	GO:1902915	GO:1902915	0	1.4603	2	9907	13568	0		0.0727916	0.655099		depleted	not_significant
GO	Core	GO:1903070	GO:1903070	0	1.4603	2	9907	13568	0		0.0727916	0.655099		depleted	not_significant
GO	Core	GO:1903329	GO:1903329	0	1.4603	2	9907	13568	0		0.0727916	0.655099		depleted	not_significant
GO	Core	GO:1903421	GO:1903421	0	1.4603	2	9907	13568	0		0.0727916	0.655099		depleted	not_significant
GO	Core	GO:1903423	GO:1903423	0	1.4603	2	9907	13568	0		0.0727916	0.655099		depleted	not_significant
GO	Core	GO:1903573	GO:1903573	0	1.4603	2	9907	13568	0		0.0727916	0.655099		depleted	not_significant
GO	Core	GO:1904293	GO:1904293	0	1.4603	2	9907	13568	0		0.0727916	0.655099		depleted	not_significant
GO	Core	GO:1904643	GO:1904643	0	1.4603	2	9907	13568	0		0.0727916	0.655099		depleted	not_significant
GO	Core	GO:1905157	GO:1905157	0	1.4603	2	9907	13568	0		0.0727916	0.655099		depleted	not_significant
GO	Core	GO:1990258	GO:1990258	0	1.4603	2	9907	13568	0		0.0727916	0.655099		depleted	not_significant
GO	Core	GO:1990259	GO:1990259	0	1.4603	2	9907	13568	0		0.0727916	0.655099		depleted	not_significant
GO	Core	GO:1990440	GO:1990440	0	1.4603	2	9907	13568	0		0.0727916	0.655099		depleted	not_significant
GO	Core	GO:1990505	GO:1990505	0	1.4603	2	9907	13568	0		0.0727916	0.655099		depleted	not_significant
GO	Core	GO:2000371	GO:2000371	0	1.4603	2	9907	13568	0		0.0727916	0.655099		depleted	not_significant
GO	Core	GO:2000373	GO:2000373	0	1.4603	2	9907	13568	0		0.0727916	0.655099		depleted	not_significant
GO	Core	GO:2000380	GO:2000380	0	1.4603	2	9907	13568	0		0.0727916	0.655099		depleted	not_significant
GO	Core	GO:2000381	GO:2000381	0	1.4603	2	9907	13568	0		0.0727916	0.655099		depleted	not_significant
GO	Core	GO:0051049	GO:0051049	174	184.734	253	9907	13568	0.941895	-0.086362	0.0732003	0.656046		depleted	not_significant
GO	Core	GO:0051716	GO:0051716	1576	1604.19	2197	9907	13568	0.982426	-0.025579	0.07339	0.656284		depleted	not_significant
GO	Core	GO:0048586	GO:0048586	43	37.969	52	9907	13568	1.1325	0.179513	0.0736878	0.658325		enriched	not_significant
GO	Core	GO:0000280	GO:0000280	123	132.161	181	9907	13568	0.93068	-0.103643	0.073869	0.659737		depleted	not_significant
GO	Core	GO:0009409	GO:0009409	326	312.514	428	9907	13568	1.04315	0.060949	0.0740702	0.660495		enriched	not_significant
GO	Core	GO:0051253	GO:0051253	267	254.831	349	9907	13568	1.04775	0.067301	0.0755357	0.660495		enriched	not_significant
GO	Core	GO:0051338	GO:0051338	92	100.034	137	9907	13568	0.919689	-0.120782	0.074476	0.660495		depleted	not_significant
GO	Core	GO:0030258	GO:0030258	85	92.7321	127	9907	13568	0.916619	-0.125606	0.075208	0.660495		depleted	not_significant
GO	Core	GO:0005798	GO:0005798	39	44.5406	61	9907	13568	0.875605	-0.191647	0.0753378	0.660495		depleted	not_significant
GO	Core	GO:0030695	GO:0030695	28	32.8578	45	9907	13568	0.852156	-0.23081	0.0745465	0.660495		depleted	not_significant
GO	Core	GO:0034399	GO:0034399	28	32.8578	45	9907	13568	0.852156	-0.23081	0.0745465	0.660495		depleted	not_significant
GO	Core	GO:0004784	GO:0004784	13	10.2224	14	9907	13568	1.27171	0.346773	0.0754921	0.660495		enriched	not_significant
GO	Core	GO:0015665	GO:0015665	13	10.2224	14	9907	13568	1.27171	0.346773	0.0754921	0.660495		enriched	not_significant
GO	Core	GO:0016721	GO:0016721	13	10.2224	14	9907	13568	1.27171	0.346773	0.0754921	0.660495		enriched	not_significant
GO	Core	GO:0019430	GO:0019430	13	10.2224	14	9907	13568	1.27171	0.346773	0.0754921	0.660495		enriched	not_significant
GO	Core	GO:0030014	GO:0030014	13	10.2224	14	9907	13568	1.27171	0.346773	0.0754921	0.660495		enriched	not_significant
GO	Core	GO:0030015	GO:0030015	13	10.2224	14	9907	13568	1.27171	0.346773	0.0754921	0.660495		enriched	not_significant
GO	Core	GO:0031409	GO:0031409	13	10.2224	14	9907	13568	1.27171	0.346773	0.0754921	0.660495		enriched	not_significant
GO	Core	GO:0034518	GO:0034518	13	10.2224	14	9907	13568	1.27171	0.346773	0.0754921	0.660495		enriched	not_significant
GO	Core	GO:0051224	GO:0051224	13	10.2224	14	9907	13568	1.27171	0.346773	0.0754921	0.660495		enriched	not_significant
GO	Core	GO:0051569	GO:0051569	13	10.2224	14	9907	13568	1.27171	0.346773	0.0754921	0.660495		enriched	not_significant
GO	Core	GO:0071450	GO:0071450	13	10.2224	14	9907	13568	1.27171	0.346773	0.0754921	0.660495		enriched	not_significant
GO	Core	GO:0071451	GO:0071451	13	10.2224	14	9907	13568	1.27171	0.346773	0.0754921	0.660495		enriched	not_significant
GO	Core	GO:1904950	GO:1904950	13	10.2224	14	9907	13568	1.27171	0.346773	0.0754921	0.660495		enriched	not_significant
GO	Core	GO:0000972	GO:0000972	6	8.7621	12	9907	13568	0.684768	-0.546312	0.0757497	0.660495		depleted	not_significant
GO	Core	GO:0002758	GO:0002758	6	8.7621	12	9907	13568	0.684768	-0.546312	0.0757497	0.660495		depleted	not_significant
GO	Core	GO:0006000	GO:0006000	6	8.7621	12	9907	13568	0.684768	-0.546312	0.0757497	0.660495		depleted	not_significant
GO	Core	GO:0008541	GO:0008541	6	8.7621	12	9907	13568	0.684768	-0.546312	0.0757497	0.660495		depleted	not_significant
GO	Core	GO:0010077	GO:0010077	6	8.7621	12	9907	13568	0.684768	-0.546312	0.0757497	0.660495		depleted	not_significant
GO	Core	GO:0010962	GO:0010962	6	8.7621	12	9907	13568	0.684768	-0.546312	0.0757497	0.660495		depleted	not_significant
GO	Core	GO:0016581	GO:0016581	6	8.7621	12	9907	13568	0.684768	-0.546312	0.0757497	0.660495		depleted	not_significant
GO	Core	GO:0032481	GO:0032481	6	8.7621	12	9907	13568	0.684768	-0.546312	0.0757497	0.660495		depleted	not_significant
GO	Core	GO:0051537	GO:0051537	6	8.7621	12	9907	13568	0.684768	-0.546312	0.0757497	0.660495		depleted	not_significant
GO	Core	GO:0060359	GO:0060359	6	8.7621	12	9907	13568	0.684768	-0.546312	0.0757497	0.660495		depleted	not_significant
GO	Core	GO:0080027	GO:0080027	6	8.7621	12	9907	13568	0.684768	-0.546312	0.0757497	0.660495		depleted	not_significant
GO	Core	GO:0090545	GO:0090545	6	8.7621	12	9907	13568	0.684768	-0.546312	0.0757497	0.660495		depleted	not_significant
GO	Core	GO:1902290	GO:1902290	6	8.7621	12	9907	13568	0.684768	-0.546312	0.0757497	0.660495		depleted	not_significant
GO	Core	GO:0031060	GO:0031060	25	21.175	29	9907	13568	1.18064	0.239563	0.0758166	0.660525		enriched	not_significant
GO	Core	GO:0009738	GO:0009738	98	90.5416	124	9907	13568	1.08238	0.114201	0.0760568	0.662354		enriched	not_significant
GO	Core	GO:0000413	GO:0000413	26	30.6673	42	9907	13568	0.847808	-0.23819	0.0766504	0.664935		depleted	not_significant
GO	Core	GO:0003755	GO:0003755	26	30.6673	42	9907	13568	0.847808	-0.23819	0.0766504	0.664935		depleted	not_significant
GO	Core	GO:0004812	GO:0004812	26	30.6673	42	9907	13568	0.847808	-0.23819	0.0766504	0.664935		depleted	not_significant
GO	Core	GO:0010109	GO:0010109	26	30.6673	42	9907	13568	0.847808	-0.23819	0.0766504	0.664935		depleted	not_significant
GO	Core	GO:0016875	GO:0016875	26	30.6673	42	9907	13568	0.847808	-0.23819	0.0766504	0.664935		depleted	not_significant
GO	Core	GO:0031647	GO:0031647	26	30.6673	42	9907	13568	0.847808	-0.23819	0.0766504	0.664935		depleted	not_significant
GO	Core	GO:0044247	GO:0044247	26	30.6673	42	9907	13568	0.847808	-0.23819	0.0766504	0.664935		depleted	not_significant
GO	Core	GO:0048509	GO:0048509	109	117.558	161	9907	13568	0.927202	-0.109045	0.0768364	0.666142		depleted	not_significant
GO	Core	GO:0044265	GO:0044265	393	408.167	559	9907	13568	0.962841	-0.054631	0.0777041	0.671616		depleted	not_significant
GO	Core	GO:0022857	GO:0022857	585	603.124	826	9907	13568	0.96995	-0.044017	0.0777671	0.671956		depleted	not_significant
GO	Core	GO:0004888	GO:0004888	141	132.161	181	9907	13568	1.06688	0.093393	0.0778514	0.672276		enriched	not_significant
GO	Core	GO:1901699	GO:1901699	83	90.5416	124	9907	13568	0.916706	-0.125469	0.078197	0.674749		depleted	not_significant
GO	Core	GO:0032879	GO:0032879	207	218.322	299	9907	13568	0.948141	-0.076827	0.0782853	0.674997		depleted	not_significant
GO	Core	GO:0042446	GO:0042446	114	122.669	168	9907	13568	0.929328	-0.105739	0.0782732	0.674997		depleted	not_significant
GO	Core	GO:0098687	GO:0098687	62	68.6364	94	9907	13568	0.903311	-0.146705	0.0785023	0.676253		depleted	not_significant
GO	Core	GO:0004553	GO:0004553	148	157.718	216	9907	13568	0.938386	-0.091746	0.0787135	0.676636		depleted	not_significant
GO	Core	GO:0008565	GO:0008565	46	51.8423	71	9907	13568	0.887305	-0.172497	0.0786135	0.676636		depleted	not_significant
GO	Core	GO:0030133	GO:0030133	24	28.4768	39	9907	13568	0.842792	-0.246752	0.0786874	0.676636		depleted	not_significant
GO	Core	GO:0030660	GO:0030660	24	28.4768	39	9907	13568	0.842792	-0.246752	0.0786874	0.676636		depleted	not_significant
GO	Core	GO:0009607	GO:0009607	754	734.555	1006	9907	13568	1.02647	0.037694	0.0802531	0.680696		enriched	not_significant
GO	Core	GO:0051707	GO:0051707	745	725.793	994	9907	13568	1.02646	0.037682	0.0817566	0.680696		enriched	not_significant
GO	Core	GO:0009057	GO:0009057	473	489.216	670	9907	13568	0.966852	-0.048633	0.0811481	0.680696		depleted	not_significant
GO	Core	GO:0050790	GO:0050790	260	272.355	373	9907	13568	0.954637	-0.066976	0.0815571	0.680696		depleted	not_significant
GO	Core	GO:1901137	GO:1901137	230	241.688	331	9907	13568	0.951642	-0.071509	0.0815851	0.680696		depleted	not_significant
GO	Core	GO:0030162	GO:0030162	81	88.351	121	9907	13568	0.916797	-0.125325	0.0813188	0.680696		depleted	not_significant
GO	Core	GO:0001934	GO:0001934	53	59.1441	81	9907	13568	0.896117	-0.158242	0.0806019	0.680696		depleted	not_significant
GO	Core	GO:0010218	GO:0010218	49	43.8104	60	9907	13568	1.11845	0.161507	0.0821256	0.680696		enriched	not_significant
GO	Core	GO:0042866	GO:0042866	35	40.1596	55	9907	13568	0.871523	-0.198389	0.0808351	0.680696		depleted	not_significant
GO	Core	GO:0010104	GO:0010104	22	26.2863	36	9907	13568	0.836939	-0.256805	0.0806148	0.680696		depleted	not_significant
GO	Core	GO:0016485	GO:0016485	22	26.2863	36	9907	13568	0.836939	-0.256805	0.0806148	0.680696		depleted	not_significant
GO	Core	GO:0050821	GO:0050821	22	26.2863	36	9907	13568	0.836939	-0.256805	0.0806148	0.680696		depleted	not_significant
GO	Core	GO:0070297	GO:0070297	22	26.2863	36	9907	13568	0.836939	-0.256805	0.0806148	0.680696		depleted	not_significant
GO	Core	GO:0090568	GO:0090568	20	24.0957	33	9907	13568	0.830022	-0.268778	0.0823737	0.680696		depleted	not_significant
GO	Core	GO:0000295	GO:0000295	17	13.8733	19	9907	13568	1.22538	0.293223	0.0795896	0.680696		enriched	not_significant
GO	Core	GO:0005346	GO:0005346	17	13.8733	19	9907	13568	1.22538	0.293223	0.0795896	0.680696		enriched	not_significant
GO	Core	GO:0015216	GO:0015216	17	13.8733	19	9907	13568	1.22538	0.293223	0.0795896	0.680696		enriched	not_significant
GO	Core	GO:0016324	GO:0016324	17	13.8733	19	9907	13568	1.22538	0.293223	0.0795896	0.680696		enriched	not_significant
GO	Core	GO:0035308	GO:0035308	17	13.8733	19	9907	13568	1.22538	0.293223	0.0795896	0.680696		enriched	not_significant
GO	Core	GO:1903409	GO:1903409	17	13.8733	19	9907	13568	1.22538	0.293223	0.0795896	0.680696		enriched	not_significant
GO	Core	GO:0000461	GO:0000461	8	5.8414	8	9907	13568	1.36954	0.453688	0.0807382	0.680696		enriched	not_significant
GO	Core	GO:0002283	GO:0002283	8	10.9526	15	9907	13568	0.73042	-0.453203	0.0813051	0.680696		depleted	not_significant
GO	Core	GO:0002792	GO:0002792	8	5.8414	8	9907	13568	1.36954	0.453688	0.0807382	0.680696		enriched	not_significant
GO	Core	GO:0004629	GO:0004629	8	5.8414	8	9907	13568	1.36954	0.453688	0.0807382	0.680696		enriched	not_significant
GO	Core	GO:0006857	GO:0006857	8	10.9526	15	9907	13568	0.73042	-0.453203	0.0813051	0.680696		depleted	not_significant
GO	Core	GO:0007032	GO:0007032	8	10.9526	15	9907	13568	0.73042	-0.453203	0.0813051	0.680696		depleted	not_significant
GO	Core	GO:0009129	GO:0009129	8	10.9526	15	9907	13568	0.73042	-0.453203	0.0813051	0.680696		depleted	not_significant
GO	Core	GO:0010117	GO:0010117	8	5.8414	8	9907	13568	1.36954	0.453688	0.0807382	0.680696		enriched	not_significant
GO	Core	GO:0010500	GO:0010500	8	5.8414	8	9907	13568	1.36954	0.453688	0.0807382	0.680696		enriched	not_significant
GO	Core	GO:0016165	GO:0016165	8	10.9526	15	9907	13568	0.73042	-0.453203	0.0813051	0.680696		depleted	not_significant
GO	Core	GO:0016801	GO:0016801	8	5.8414	8	9907	13568	1.36954	0.453688	0.0807382	0.680696		enriched	not_significant
GO	Core	GO:0019213	GO:0019213	8	10.9526	15	9907	13568	0.73042	-0.453203	0.0813051	0.680696		depleted	not_significant
GO	Core	GO:0019218	GO:0019218	8	5.8414	8	9907	13568	1.36954	0.453688	0.0807382	0.680696		enriched	not_significant
GO	Core	GO:0019287	GO:0019287	8	5.8414	8	9907	13568	1.36954	0.453688	0.0807382	0.680696		enriched	not_significant
GO	Core	GO:0019320	GO:0019320	8	10.9526	15	9907	13568	0.73042	-0.453203	0.0813051	0.680696		depleted	not_significant
GO	Core	GO:0032527	GO:0032527	8	5.8414	8	9907	13568	1.36954	0.453688	0.0807382	0.680696		enriched	not_significant
GO	Core	GO:0033559	GO:0033559	8	10.9526	15	9907	13568	0.73042	-0.453203	0.0813051	0.680696		depleted	not_significant
GO	Core	GO:0036513	GO:0036513	8	5.8414	8	9907	13568	1.36954	0.453688	0.0807382	0.680696		enriched	not_significant
GO	Core	GO:0042119	GO:0042119	8	10.9526	15	9907	13568	0.73042	-0.453203	0.0813051	0.680696		depleted	not_significant
GO	Core	GO:0042219	GO:0042219	8	5.8414	8	9907	13568	1.36954	0.453688	0.0807382	0.680696		enriched	not_significant
GO	Core	GO:0042284	GO:0042284	8	5.8414	8	9907	13568	1.36954	0.453688	0.0807382	0.680696		enriched	not_significant
GO	Core	GO:0043462	GO:0043462	8	10.9526	15	9907	13568	0.73042	-0.453203	0.0813051	0.680696		depleted	not_significant
GO	Core	GO:0043486	GO:0043486	8	10.9526	15	9907	13568	0.73042	-0.453203	0.0813051	0.680696		depleted	not_significant
GO	Core	GO:0044615	GO:0044615	8	5.8414	8	9907	13568	1.36954	0.453688	0.0807382	0.680696		enriched	not_significant
GO	Core	GO:0045735	GO:0045735	8	5.8414	8	9907	13568	1.36954	0.453688	0.0807382	0.680696		enriched	not_significant
GO	Core	GO:0046622	GO:0046622	8	5.8414	8	9907	13568	1.36954	0.453688	0.0807382	0.680696		enriched	not_significant
GO	Core	GO:0046883	GO:0046883	8	5.8414	8	9907	13568	1.36954	0.453688	0.0807382	0.680696		enriched	not_significant
GO	Core	GO:0046898	GO:0046898	8	10.9526	15	9907	13568	0.73042	-0.453203	0.0813051	0.680696		depleted	not_significant
GO	Core	GO:0048832	GO:0048832	8	10.9526	15	9907	13568	0.73042	-0.453203	0.0813051	0.680696		depleted	not_significant
GO	Core	GO:0048833	GO:0048833	8	10.9526	15	9907	13568	0.73042	-0.453203	0.0813051	0.680696		depleted	not_significant
GO	Core	GO:0050709	GO:0050709	8	5.8414	8	9907	13568	1.36954	0.453688	0.0807382	0.680696		enriched	not_significant
GO	Core	GO:0050796	GO:0050796	8	5.8414	8	9907	13568	1.36954	0.453688	0.0807382	0.680696		enriched	not_significant
GO	Core	GO:0051048	GO:0051048	8	5.8414	8	9907	13568	1.36954	0.453688	0.0807382	0.680696		enriched	not_significant
GO	Core	GO:0071005	GO:0071005	8	5.8414	8	9907	13568	1.36954	0.453688	0.0807382	0.680696		enriched	not_significant
GO	Core	GO:0071949	GO:0071949	8	5.8414	8	9907	13568	1.36954	0.453688	0.0807382	0.680696		enriched	not_significant
GO	Core	GO:0080171	GO:0080171	8	5.8414	8	9907	13568	1.36954	0.453688	0.0807382	0.680696		enriched	not_significant
GO	Core	GO:0090181	GO:0090181	8	5.8414	8	9907	13568	1.36954	0.453688	0.0807382	0.680696		enriched	not_significant
GO	Core	GO:0090276	GO:0090276	8	5.8414	8	9907	13568	1.36954	0.453688	0.0807382	0.680696		enriched	not_significant
GO	Core	GO:0097064	GO:0097064	8	5.8414	8	9907	13568	1.36954	0.453688	0.0807382	0.680696		enriched	not_significant
GO	Core	GO:1900459	GO:1900459	8	5.8414	8	9907	13568	1.36954	0.453688	0.0807382	0.680696		enriched	not_significant
GO	Core	GO:1902288	GO:1902288	8	10.9526	15	9907	13568	0.73042	-0.453203	0.0813051	0.680696		depleted	not_significant
GO	Core	GO:1903531	GO:1903531	8	5.8414	8	9907	13568	1.36954	0.453688	0.0807382	0.680696		enriched	not_significant
GO	Core	GO:0009165	GO:0009165	117	125.59	172	9907	13568	0.931603	-0.102212	0.0826177	0.680702		depleted	not_significant
GO	Core	GO:1901293	GO:1901293	117	125.59	172	9907	13568	0.931603	-0.102212	0.0826177	0.680702		depleted	not_significant
GO	Core	GO:0098772	GO:0098772	188	198.607	272	9907	13568	0.946592	-0.079186	0.0828689	0.682031		depleted	not_significant
GO	Core	GO:0065009	GO:0065009	341	354.865	486	9907	13568	0.96093	-0.057497	0.0831064	0.68359		depleted	not_significant
GO	Core	GO:0042393	GO:0042393	51	56.9536	78	9907	13568	0.895466	-0.159289	0.0838132	0.687205		depleted	not_significant
GO	Core	GO:0140104	GO:0140104	18	21.9052	30	9907	13568	0.821722	-0.283278	0.0838833	0.687205		depleted	not_significant
GO	Core	GO:2000058	GO:2000058	18	21.9052	30	9907	13568	0.821722	-0.283278	0.0838833	0.687205		depleted	not_significant
GO	Core	GO:0070011	GO:0070011	166	175.972	241	9907	13568	0.943332	-0.084162	0.0841097	0.688653		depleted	not_significant
GO	Core	GO:0098660	GO:0098660	233	244.608	335	9907	13568	0.952543	-0.070143	0.0842742	0.689007		depleted	not_significant
GO	Core	GO:0033962	GO:0033962	10	13.1431	18	9907	13568	0.760854	-0.394309	0.0842506	0.689007		depleted	not_significant
GO	Core	GO:0071004	GO:0071004	10	13.1431	18	9907	13568	0.760854	-0.394309	0.0842506	0.689007		depleted	not_significant
GO	Core	GO:0071027	GO:0071027	10	13.1431	18	9907	13568	0.760854	-0.394309	0.0842506	0.689007		depleted	not_significant
GO	Core	GO:0000226	GO:0000226	110	118.288	162	9907	13568	0.929932	-0.104802	0.0844091	0.68936		depleted	not_significant
GO	Core	GO:0019363	GO:0019363	42	47.4613	65	9907	13568	0.884931	-0.176362	0.0848026	0.68936		depleted	not_significant
GO	Core	GO:0080008	GO:0080008	42	47.4613	65	9907	13568	0.884931	-0.176362	0.0848026	0.68936		depleted	not_significant
GO	Core	GO:0000781	GO:0000781	16	19.7147	27	9907	13568	0.811577	-0.3012	0.0850302	0.690224		depleted	not_significant
GO	Core	GO:0010332	GO:0010332	16	19.7147	27	9907	13568	0.811577	-0.3012	0.0850302	0.690224		depleted	not_significant
GO	Core	GO:0071010	GO:0071010	16	19.7147	27	9907	13568	0.811577	-0.3012	0.0850302	0.690224		depleted	not_significant
GO	Core	GO:0000784	GO:0000784	12	15.3337	21	9907	13568	0.782592	-0.353667	0.085512	0.691567		depleted	not_significant
GO	Core	GO:0004402	GO:0004402	12	15.3337	21	9907	13568	0.782592	-0.353667	0.085512	0.691567		depleted	not_significant
GO	Core	GO:0005689	GO:0005689	12	15.3337	21	9907	13568	0.782592	-0.353667	0.085512	0.691567		depleted	not_significant
GO	Core	GO:0008187	GO:0008187	12	15.3337	21	9907	13568	0.782592	-0.353667	0.085512	0.691567		depleted	not_significant
GO	Core	GO:0010152	GO:0010152	12	15.3337	21	9907	13568	0.782592	-0.353667	0.085512	0.691567		depleted	not_significant
GO	Core	GO:0031365	GO:0031365	12	15.3337	21	9907	13568	0.782592	-0.353667	0.085512	0.691567		depleted	not_significant
GO	Core	GO:0048448	GO:0048448	12	15.3337	21	9907	13568	0.782592	-0.353667	0.085512	0.691567		depleted	not_significant
GO	Core	GO:0051788	GO:0051788	12	15.3337	21	9907	13568	0.782592	-0.353667	0.085512	0.691567		depleted	not_significant
GO	Core	GO:0061733	GO:0061733	12	15.3337	21	9907	13568	0.782592	-0.353667	0.085512	0.691567		depleted	not_significant
GO	Core	GO:1901879	GO:1901879	12	15.3337	21	9907	13568	0.782592	-0.353667	0.085512	0.691567		depleted	not_significant
GO	Core	GO:0006334	GO:0006334	28	24.0957	33	9907	13568	1.16203	0.216649	0.0856105	0.691659		enriched	not_significant
GO	Core	GO:0009593	GO:0009593	28	24.0957	33	9907	13568	1.16203	0.216649	0.0856105	0.691659		enriched	not_significant
GO	Core	GO:0030658	GO:0030658	14	17.5242	24	9907	13568	0.798896	-0.32392	0.0856523	0.691717		depleted	not_significant
GO	Core	GO:0034248	GO:0034248	106	98.5735	135	9907	13568	1.07534	0.104793	0.0863335	0.695125		enriched	not_significant
GO	Core	GO:0009295	GO:0009295	31	35.7785	49	9907	13568	0.866442	-0.206826	0.0866196	0.69656		depleted	not_significant
GO	Core	GO:0031668	GO:0031668	169	178.893	245	9907	13568	0.944701	-0.082071	0.0875586	0.698616		depleted	not_significant
GO	Core	GO:0030001	GO:0030001	164	173.781	238	9907	13568	0.943714	-0.083578	0.0870875	0.698616		depleted	not_significant
GO	Core	GO:0008380	GO:0008380	142	151.146	207	9907	13568	0.939489	-0.090052	0.0876644	0.698616		depleted	not_significant
GO	Core	GO:0140014	GO:0140014	49	54.763	75	9907	13568	0.894764	-0.160421	0.087167	0.698616		depleted	not_significant
GO	Core	GO:0007178	GO:0007178	115	107.336	147	9907	13568	1.07141	0.099506	0.0883028	0.70058		enriched	not_significant
GO	Core	GO:0043549	GO:0043549	70	76.6683	105	9907	13568	0.913024	-0.131275	0.0886211	0.702713		depleted	not_significant
GO	Core	GO:0032553	GO:0032553	157	166.48	228	9907	13568	0.943058	-0.084581	0.089649	0.708004		depleted	not_significant
GO	Core	GO:0002682	GO:0002682	135	143.844	197	9907	13568	0.938515	-0.091548	0.090058	0.708004		depleted	not_significant
GO	Core	GO:0001894	GO:0001894	3	5.1112	7	9907	13568	0.586944	-0.768705	0.09026	0.708004		depleted	not_significant
GO	Core	GO:0002429	GO:0002429	3	5.1112	7	9907	13568	0.586944	-0.768705	0.09026	0.708004		depleted	not_significant
GO	Core	GO:0002768	GO:0002768	3	5.1112	7	9907	13568	0.586944	-0.768705	0.09026	0.708004		depleted	not_significant
GO	Core	GO:0003906	GO:0003906	3	5.1112	7	9907	13568	0.586944	-0.768705	0.09026	0.708004		depleted	not_significant
GO	Core	GO:0005786	GO:0005786	3	5.1112	7	9907	13568	0.586944	-0.768705	0.09026	0.708004		depleted	not_significant
GO	Core	GO:0006105	GO:0006105	3	5.1112	7	9907	13568	0.586944	-0.768705	0.09026	0.708004		depleted	not_significant
GO	Core	GO:0006971	GO:0006971	3	5.1112	7	9907	13568	0.586944	-0.768705	0.09026	0.708004		depleted	not_significant
GO	Core	GO:0007254	GO:0007254	3	5.1112	7	9907	13568	0.586944	-0.768705	0.09026	0.708004		depleted	not_significant
GO	Core	GO:0015114	GO:0015114	3	5.1112	7	9907	13568	0.586944	-0.768705	0.09026	0.708004		depleted	not_significant
GO	Core	GO:0015853	GO:0015853	3	5.1112	7	9907	13568	0.586944	-0.768705	0.09026	0.708004		depleted	not_significant
GO	Core	GO:0015854	GO:0015854	3	5.1112	7	9907	13568	0.586944	-0.768705	0.09026	0.708004		depleted	not_significant
GO	Core	GO:0030060	GO:0030060	3	5.1112	7	9907	13568	0.586944	-0.768705	0.09026	0.708004		depleted	not_significant
GO	Core	GO:0030186	GO:0030186	3	5.1112	7	9907	13568	0.586944	-0.768705	0.09026	0.708004		depleted	not_significant
GO	Core	GO:0030187	GO:0030187	3	5.1112	7	9907	13568	0.586944	-0.768705	0.09026	0.708004		depleted	not_significant
GO	Core	GO:0034517	GO:0034517	3	5.1112	7	9907	13568	0.586944	-0.768705	0.09026	0.708004		depleted	not_significant
GO	Core	GO:0035035	GO:0035035	3	5.1112	7	9907	13568	0.586944	-0.768705	0.09026	0.708004		depleted	not_significant
GO	Core	GO:0042149	GO:0042149	3	5.1112	7	9907	13568	0.586944	-0.768705	0.09026	0.708004		depleted	not_significant
GO	Core	GO:0042436	GO:0042436	3	5.1112	7	9907	13568	0.586944	-0.768705	0.09026	0.708004		depleted	not_significant
GO	Core	GO:0043123	GO:0043123	3	5.1112	7	9907	13568	0.586944	-0.768705	0.09026	0.708004		depleted	not_significant
GO	Core	GO:0046030	GO:0046030	3	5.1112	7	9907	13568	0.586944	-0.768705	0.09026	0.708004		depleted	not_significant
GO	Core	GO:0048500	GO:0048500	3	5.1112	7	9907	13568	0.586944	-0.768705	0.09026	0.708004		depleted	not_significant
GO	Core	GO:0051403	GO:0051403	3	5.1112	7	9907	13568	0.586944	-0.768705	0.09026	0.708004		depleted	not_significant
GO	Core	GO:0072553	GO:0072553	3	5.1112	7	9907	13568	0.586944	-0.768705	0.09026	0.708004		depleted	not_significant
GO	Core	GO:0099172	GO:0099172	3	5.1112	7	9907	13568	0.586944	-0.768705	0.09026	0.708004		depleted	not_significant
GO	Core	GO:1901652	GO:1901652	3	5.1112	7	9907	13568	0.586944	-0.768705	0.09026	0.708004		depleted	not_significant
GO	Core	GO:1903321	GO:1903321	3	5.1112	7	9907	13568	0.586944	-0.768705	0.09026	0.708004		depleted	not_significant
GO	Core	GO:1905538	GO:1905538	3	5.1112	7	9907	13568	0.586944	-0.768705	0.09026	0.708004		depleted	not_significant
GO	Core	GO:1990825	GO:1990825	3	5.1112	7	9907	13568	0.586944	-0.768705	0.09026	0.708004		depleted	not_significant
GO	Core	GO:1990861	GO:1990861	3	5.1112	7	9907	13568	0.586944	-0.768705	0.09026	0.708004		depleted	not_significant
GO	Core	GO:0008285	GO:0008285	47	52.5725	72	9907	13568	0.894003	-0.161648	0.0906709	0.710159		depleted	not_significant
GO	Core	GO:0072657	GO:0072657	47	52.5725	72	9907	13568	0.894003	-0.161648	0.0906709	0.710159		depleted	not_significant
GO	Core	GO:0009583	GO:0009583	24	20.4449	28	9907	13568	1.17389	0.231295	0.0912544	0.713245		enriched	not_significant
GO	Core	GO:0071555	GO:0071555	145	136.542	187	9907	13568	1.06194	0.086703	0.0916774	0.715782		enriched	not_significant
GO	Core	GO:0009788	GO:0009788	58	52.5725	72	9907	13568	1.10324	0.141744	0.0918413	0.716059		enriched	not_significant
GO	Core	GO:0009813	GO:0009813	58	52.5725	72	9907	13568	1.10324	0.141744	0.0918413	0.716059		enriched	not_significant
GO	Core	GO:1901420	GO:1901420	58	52.5725	72	9907	13568	1.10324	0.141744	0.0918413	0.716059		enriched	not_significant
GO	Core	GO:1905958	GO:1905958	58	52.5725	72	9907	13568	1.10324	0.141744	0.0918413	0.716059		enriched	not_significant
GO	Core	GO:0044036	GO:0044036	96	89.0812	122	9907	13568	1.07767	0.107913	0.0920467	0.717465		enriched	not_significant
GO	Core	GO:0040008	GO:0040008	246	235.116	322	9907	13568	1.04629	0.065286	0.0922538	0.717897		enriched	not_significant
GO	Core	GO:0009914	GO:0009914	74	67.9062	93	9907	13568	1.08974	0.123982	0.0923399	0.71837		enriched	not_significant
GO	Core	GO:0048583	GO:0048583	775	756.46	1036	9907	13568	1.02451	0.034932	0.0938426	0.720231		enriched	not_significant
GO	Core	GO:0009555	GO:0009555	245	256.291	351	9907	13568	0.955944	-0.065001	0.0952941	0.720231		depleted	not_significant
GO	Core	GO:0006644	GO:0006644	116	124.13	170	9907	13568	0.934507	-0.097722	0.0937625	0.720231		depleted	not_significant
GO	Core	GO:0006733	GO:0006733	73	79.589	109	9907	13568	0.917213	-0.124672	0.0952845	0.720231		depleted	not_significant
GO	Core	GO:0009648	GO:0009648	61	55.4932	76	9907	13568	1.09923	0.136498	0.0944568	0.720231		enriched	not_significant
GO	Core	GO:0009646	GO:0009646	48	43.0803	59	9907	13568	1.1142	0.156007	0.0937081	0.720231		enriched	not_significant
GO	Core	GO:0006090	GO:0006090	45	50.382	69	9907	13568	0.893176	-0.162983	0.0943325	0.720231		depleted	not_significant
GO	Core	GO:0023014	GO:0023014	45	50.382	69	9907	13568	0.893176	-0.162983	0.0943325	0.720231		depleted	not_significant
GO	Core	GO:0005886	GO:0005886	1843	1869.98	2561	9907	13568	0.985574	-0.020963	0.0956118	0.720607		depleted	not_significant
GO	Core	GO:0009941	GO:0009941	387	400.865	549	9907	13568	0.965411	-0.050785	0.0955591	0.720607		depleted	not_significant
GO	Core	GO:0000070	GO:0000070	25	29.207	40	9907	13568	0.85596	-0.224384	0.0956622	0.720607		depleted	not_significant
GO	Core	GO:0031098	GO:0031098	25	29.207	40	9907	13568	0.85596	-0.224384	0.0956622	0.720607		depleted	not_significant
GO	Core	GO:0004675	GO:0004675	114	106.605	146	9907	13568	1.06936	0.096753	0.0962326	0.722287		enriched	not_significant
GO	Core	GO:0007568	GO:0007568	114	106.605	146	9907	13568	1.06936	0.096753	0.0962326	0.722287		enriched	not_significant
GO	Core	GO:0000790	GO:0000790	66	72.2872	99	9907	13568	0.913024	-0.131275	0.0960219	0.722287		depleted	not_significant
GO	Core	GO:0019362	GO:0019362	66	72.2872	99	9907	13568	0.913024	-0.131275	0.0960219	0.722287		depleted	not_significant
GO	Core	GO:0043254	GO:0043254	66	72.2872	99	9907	13568	0.913024	-0.131275	0.0960219	0.722287		depleted	not_significant
GO	Core	GO:0016810	GO:0016810	59	64.9855	89	9907	13568	0.907895	-0.139402	0.0962516	0.722287		depleted	not_significant
GO	Core	GO:0009543	GO:0009543	20	16.794	23	9907	13568	1.1909	0.252054	0.0961961	0.722287		enriched	not_significant
GO	Core	GO:0009938	GO:0009938	20	16.794	23	9907	13568	1.1909	0.252054	0.0961961	0.722287		enriched	not_significant
GO	Core	GO:0031978	GO:0031978	20	16.794	23	9907	13568	1.1909	0.252054	0.0961961	0.722287		enriched	not_significant
GO	Core	GO:0035305	GO:0035305	20	16.794	23	9907	13568	1.1909	0.252054	0.0961961	0.722287		enriched	not_significant
GO	Core	GO:0050826	GO:0050826	20	16.794	23	9907	13568	1.1909	0.252054	0.0961961	0.722287		enriched	not_significant
GO	Core	GO:1902930	GO:1902930	20	16.794	23	9907	13568	1.1909	0.252054	0.0961961	0.722287		enriched	not_significant
GO	Core	GO:0010604	GO:0010604	613	596.552	817	9907	13568	1.02757	0.039239	0.0966968	0.725133		enriched	not_significant
GO	Core	GO:0007167	GO:0007167	117	109.526	150	9907	13568	1.06824	0.095234	0.0967048	0.725133		enriched	not_significant
GO	Core	GO:0006950	GO:0006950	2011	2038.65	2792	9907	13568	0.986439	-0.019698	0.0972672	0.726		depleted	not_significant
GO	Core	GO:0051173	GO:0051173	576	560.043	767	9907	13568	1.02849	0.04053	0.0970464	0.726		enriched	not_significant
GO	Core	GO:0000447	GO:0000447	12	9.4923	13	9907	13568	1.26419	0.338211	0.0972255	0.726		enriched	not_significant
GO	Core	GO:0007164	GO:0007164	12	9.4923	13	9907	13568	1.26419	0.338211	0.0972255	0.726		enriched	not_significant
GO	Core	GO:0009299	GO:0009299	12	9.4923	13	9907	13568	1.26419	0.338211	0.0972255	0.726		enriched	not_significant
GO	Core	GO:0015140	GO:0015140	12	9.4923	13	9907	13568	1.26419	0.338211	0.0972255	0.726		enriched	not_significant
GO	Core	GO:0015743	GO:0015743	12	9.4923	13	9907	13568	1.26419	0.338211	0.0972255	0.726		enriched	not_significant
GO	Core	GO:0015867	GO:0015867	12	9.4923	13	9907	13568	1.26419	0.338211	0.0972255	0.726		enriched	not_significant
GO	Core	GO:0042807	GO:0042807	12	9.4923	13	9907	13568	1.26419	0.338211	0.0972255	0.726		enriched	not_significant
GO	Core	GO:0043433	GO:0043433	12	9.4923	13	9907	13568	1.26419	0.338211	0.0972255	0.726		enriched	not_significant
GO	Core	GO:0051196	GO:0051196	12	9.4923	13	9907	13568	1.26419	0.338211	0.0972255	0.726		enriched	not_significant
GO	Core	GO:0051571	GO:0051571	12	9.4923	13	9907	13568	1.26419	0.338211	0.0972255	0.726		enriched	not_significant
GO	Core	GO:0070300	GO:0070300	12	9.4923	13	9907	13568	1.26419	0.338211	0.0972255	0.726		enriched	not_significant
GO	Core	GO:0071423	GO:0071423	12	9.4923	13	9907	13568	1.26419	0.338211	0.0972255	0.726		enriched	not_significant
GO	Core	GO:0001085	GO:0001085	41	36.5087	50	9907	13568	1.12302	0.167384	0.0979727	0.730017		enriched	not_significant
GO	Core	GO:0017016	GO:0017016	43	48.1915	66	9907	13568	0.892274	-0.164441	0.0981603	0.73084		depleted	not_significant
GO	Core	GO:0031267	GO:0031267	43	48.1915	66	9907	13568	0.892274	-0.164441	0.0981603	0.73084		depleted	not_significant
GO	Core	GO:0007005	GO:0007005	102	109.526	150	9907	13568	0.931285	-0.102705	0.0983004	0.731692		depleted	not_significant
GO	Core	GO:0010959	GO:0010959	23	27.0164	37	9907	13568	0.851334	-0.232203	0.0986936	0.733849		depleted	not_significant
GO	Core	GO:0033500	GO:0033500	23	27.0164	37	9907	13568	0.851334	-0.232203	0.0986936	0.733849		depleted	not_significant
GO	Core	GO:0000302	GO:0000302	168	159.178	218	9907	13568	1.05542	0.077821	0.0988151	0.734561		enriched	not_significant
GO	Core	GO:0015144	GO:0015144	67	61.3346	84	9907	13568	1.09237	0.12746	0.0989389	0.734904		enriched	not_significant
GO	Core	GO:0034219	GO:0034219	67	61.3346	84	9907	13568	1.09237	0.12746	0.0989389	0.734904		enriched	not_significant
GO	Core	GO:0046434	GO:0046434	64	70.0967	96	9907	13568	0.913024	-0.131275	0.0999867	0.740944		depleted	not_significant
GO	Core	GO:0042327	GO:0042327	57	62.795	86	9907	13568	0.907716	-0.139687	0.100241	0.741698		depleted	not_significant
GO	Core	GO:0016458	GO:0016458	95	102.224	140	9907	13568	0.929328	-0.105739	0.100481	0.743059		depleted	not_significant
GO	Core	GO:0045926	GO:0045926	54	48.9217	67	9907	13568	1.10381	0.142486	0.100524	0.743165		enriched	not_significant
GO	Core	GO:0005509	GO:0005509	95	88.351	121	9907	13568	1.07526	0.10468	0.101002	0.746136		enriched	not_significant
GO	Core	GO:0051817	GO:0051817	34	29.9371	41	9907	13568	1.13571	0.183599	0.101057	0.746346		enriched	not_significant
GO	Core	GO:0010315	GO:0010315	27	23.3656	32	9907	13568	1.15555	0.208575	0.10156	0.746764		enriched	not_significant
GO	Core	GO:0015605	GO:0015605	27	23.3656	32	9907	13568	1.15555	0.208575	0.10156	0.746764		enriched	not_significant
GO	Core	GO:0072341	GO:0072341	27	23.3656	32	9907	13568	1.15555	0.208575	0.10156	0.746764		enriched	not_significant
GO	Core	GO:0005881	GO:0005881	21	24.8259	34	9907	13568	0.84589	-0.241458	0.101673	0.74682		depleted	not_significant
GO	Core	GO:0034708	GO:0034708	21	24.8259	34	9907	13568	0.84589	-0.241458	0.101673	0.74682		depleted	not_significant
GO	Core	GO:0047134	GO:0047134	21	24.8259	34	9907	13568	0.84589	-0.241458	0.101673	0.74682		depleted	not_significant
GO	Core	GO:0071216	GO:0071216	21	24.8259	34	9907	13568	0.84589	-0.241458	0.101673	0.74682		depleted	not_significant
GO	Core	GO:0006928	GO:0006928	100	107.336	147	9907	13568	0.931658	-0.102128	0.10215	0.749256		depleted	not_significant
GO	Core	GO:0019359	GO:0019359	41	46.001	63	9907	13568	0.891286	-0.16604	0.102163	0.749256		depleted	not_significant
GO	Core	GO:0048444	GO:0048444	41	46.001	63	9907	13568	0.891286	-0.16604	0.102163	0.749256		depleted	not_significant
GO	Core	GO:0004197	GO:0004197	32	36.5087	50	9907	13568	0.876503	-0.190168	0.102517	0.750112		depleted	not_significant
GO	Core	GO:0006664	GO:0006664	32	36.5087	50	9907	13568	0.876503	-0.190168	0.102517	0.750112		depleted	not_significant
GO	Core	GO:1903509	GO:1903509	32	36.5087	50	9907	13568	0.876503	-0.190168	0.102517	0.750112		depleted	not_significant
GO	Core	GO:0009791	GO:0009791	1036	1015.67	1391	9907	13568	1.02001	0.02859	0.102627	0.750186		enriched	not_significant
GO	Core	GO:0060918	GO:0060918	73	67.176	92	9907	13568	1.0867	0.119951	0.102581	0.750186		enriched	not_significant
GO	Core	GO:0001103	GO:0001103	5	7.3017	10	9907	13568	0.684768	-0.546312	0.103362	0.751838		depleted	not_significant
GO	Core	GO:0002221	GO:0002221	5	7.3017	10	9907	13568	0.684768	-0.546312	0.103362	0.751838		depleted	not_significant
GO	Core	GO:0004849	GO:0004849	5	7.3017	10	9907	13568	0.684768	-0.546312	0.103362	0.751838		depleted	not_significant
GO	Core	GO:0006222	GO:0006222	5	7.3017	10	9907	13568	0.684768	-0.546312	0.103362	0.751838		depleted	not_significant
GO	Core	GO:0006999	GO:0006999	5	7.3017	10	9907	13568	0.684768	-0.546312	0.103362	0.751838		depleted	not_significant
GO	Core	GO:0009174	GO:0009174	5	7.3017	10	9907	13568	0.684768	-0.546312	0.103362	0.751838		depleted	not_significant
GO	Core	GO:0015691	GO:0015691	5	7.3017	10	9907	13568	0.684768	-0.546312	0.103362	0.751838		depleted	not_significant
GO	Core	GO:0016886	GO:0016886	5	7.3017	10	9907	13568	0.684768	-0.546312	0.103362	0.751838		depleted	not_significant
GO	Core	GO:0031086	GO:0031086	5	7.3017	10	9907	13568	0.684768	-0.546312	0.103362	0.751838		depleted	not_significant
GO	Core	GO:0031087	GO:0031087	5	7.3017	10	9907	13568	0.684768	-0.546312	0.103362	0.751838		depleted	not_significant
GO	Core	GO:0043122	GO:0043122	5	7.3017	10	9907	13568	0.684768	-0.546312	0.103362	0.751838		depleted	not_significant
GO	Core	GO:0045910	GO:0045910	5	7.3017	10	9907	13568	0.684768	-0.546312	0.103362	0.751838		depleted	not_significant
GO	Core	GO:0046049	GO:0046049	5	7.3017	10	9907	13568	0.684768	-0.546312	0.103362	0.751838		depleted	not_significant
GO	Core	GO:0046500	GO:0046500	5	7.3017	10	9907	13568	0.684768	-0.546312	0.103362	0.751838		depleted	not_significant
GO	Core	GO:0090342	GO:0090342	5	7.3017	10	9907	13568	0.684768	-0.546312	0.103362	0.751838		depleted	not_significant
GO	Core	GO:2000036	GO:2000036	5	7.3017	10	9907	13568	0.684768	-0.546312	0.103362	0.751838		depleted	not_significant
GO	Core	GO:0051130	GO:0051130	105	112.447	154	9907	13568	0.933775	-0.098853	0.103637	0.752108		depleted	not_significant
GO	Core	GO:0001932	GO:0001932	81	87.6209	120	9907	13568	0.924437	-0.113353	0.104477	0.757313		depleted	not_significant
GO	Core	GO:0008080	GO:0008080	19	22.6354	31	9907	13568	0.839393	-0.252581	0.104541	0.757313		depleted	not_significant
GO	Core	GO:0016579	GO:0016579	19	22.6354	31	9907	13568	0.839393	-0.252581	0.104541	0.757313		depleted	not_significant
GO	Core	GO:0045324	GO:0045324	19	22.6354	31	9907	13568	0.839393	-0.252581	0.104541	0.757313		depleted	not_significant
GO	Core	GO:0000375	GO:0000375	110	117.558	161	9907	13568	0.935708	-0.095869	0.10496	0.759579		depleted	not_significant
GO	Core	GO:0009059	GO:0009059	757	739.666	1013	9907	13568	1.02344	0.033419	0.107226	0.760281		enriched	not_significant
GO	Core	GO:0022890	GO:0022890	202	211.75	290	9907	13568	0.953953	-0.06801	0.108904	0.760281		depleted	not_significant
GO	Core	GO:0097367	GO:0097367	182	191.306	262	9907	13568	0.951358	-0.07194	0.108851	0.760281		depleted	not_significant
GO	Core	GO:0005743	GO:0005743	161	152.606	209	9907	13568	1.055	0.077246	0.106243	0.760281		enriched	not_significant
GO	Core	GO:0048037	GO:0048037	152	160.638	220	9907	13568	0.946225	-0.079744	0.107363	0.760281		depleted	not_significant
GO	Core	GO:0003682	GO:0003682	122	114.637	157	9907	13568	1.06423	0.089805	0.105739	0.760281		enriched	not_significant
GO	Core	GO:0006399	GO:0006399	79	85.4304	117	9907	13568	0.92473	-0.112896	0.108732	0.760281		depleted	not_significant
GO	Core	GO:0009932	GO:0009932	79	85.4304	117	9907	13568	0.92473	-0.112896	0.108732	0.760281		depleted	not_significant
GO	Core	GO:0018105	GO:0018105	66	60.6044	83	9907	13568	1.08903	0.123043	0.110268	0.760281		enriched	not_significant
GO	Core	GO:0018209	GO:0018209	66	60.6044	83	9907	13568	1.08903	0.123043	0.110268	0.760281		enriched	not_significant
GO	Core	GO:0015748	GO:0015748	47	42.3501	58	9907	13568	1.1098	0.150296	0.106618	0.760281		enriched	not_significant
GO	Core	GO:0048449	GO:0048449	30	34.3182	47	9907	13568	0.874172	-0.19401	0.106462	0.760281		depleted	not_significant
GO	Core	GO:0080113	GO:0080113	30	26.2863	36	9907	13568	1.14128	0.190654	0.110146	0.760281		enriched	not_significant
GO	Core	GO:1901568	GO:1901568	30	34.3182	47	9907	13568	0.874172	-0.19401	0.106462	0.760281		depleted	not_significant
GO	Core	GO:0009635	GO:0009635	23	19.7147	27	9907	13568	1.16664	0.222362	0.109381	0.760281		enriched	not_significant
GO	Core	GO:0034644	GO:0034644	23	19.7147	27	9907	13568	1.16664	0.222362	0.109381	0.760281		enriched	not_significant
GO	Core	GO:0045055	GO:0045055	17	20.4449	28	9907	13568	0.831504	-0.266204	0.107209	0.760281		depleted	not_significant
GO	Core	GO:0051568	GO:0051568	17	20.4449	28	9907	13568	0.831504	-0.266204	0.107209	0.760281		depleted	not_significant
GO	Core	GO:0009070	GO:0009070	15	18.2543	25	9907	13568	0.821722	-0.283278	0.109549	0.760281		depleted	not_significant
GO	Core	GO:0010975	GO:0010975	15	18.2543	25	9907	13568	0.821722	-0.283278	0.109549	0.760281		depleted	not_significant
GO	Core	GO:0019252	GO:0019252	15	18.2543	25	9907	13568	0.821722	-0.283278	0.109549	0.760281		depleted	not_significant
GO	Core	GO:0043266	GO:0043266	15	18.2543	25	9907	13568	0.821722	-0.283278	0.109549	0.760281		depleted	not_significant
GO	Core	GO:0000076	GO:0000076	7	5.1112	7	9907	13568	1.36954	0.453688	0.110595	0.760281		enriched	not_significant
GO	Core	GO:0000182	GO:0000182	7	5.1112	7	9907	13568	1.36954	0.453688	0.110595	0.760281		enriched	not_significant
GO	Core	GO:0000339	GO:0000339	7	5.1112	7	9907	13568	1.36954	0.453688	0.110595	0.760281		enriched	not_significant
GO	Core	GO:0000813	GO:0000813	7	5.1112	7	9907	13568	1.36954	0.453688	0.110595	0.760281		enriched	not_significant
GO	Core	GO:0002444	GO:0002444	7	9.4923	13	9907	13568	0.737443	-0.439397	0.109557	0.760281		depleted	not_significant
GO	Core	GO:0002446	GO:0002446	7	9.4923	13	9907	13568	0.737443	-0.439397	0.109557	0.760281		depleted	not_significant
GO	Core	GO:0003032	GO:0003032	7	5.1112	7	9907	13568	1.36954	0.453688	0.110595	0.760281		enriched	not_significant
GO	Core	GO:0004525	GO:0004525	7	9.4923	13	9907	13568	0.737443	-0.439397	0.109557	0.760281		depleted	not_significant
GO	Core	GO:0005663	GO:0005663	7	9.4923	13	9907	13568	0.737443	-0.439397	0.109557	0.760281		depleted	not_significant
GO	Core	GO:0006751	GO:0006751	7	5.1112	7	9907	13568	1.36954	0.453688	0.110595	0.760281		enriched	not_significant
GO	Core	GO:0008295	GO:0008295	7	5.1112	7	9907	13568	1.36954	0.453688	0.110595	0.760281		enriched	not_significant
GO	Core	GO:0009523	GO:0009523	7	5.1112	7	9907	13568	1.36954	0.453688	0.110595	0.760281		enriched	not_significant
GO	Core	GO:0010375	GO:0010375	7	5.1112	7	9907	13568	1.36954	0.453688	0.110595	0.760281		enriched	not_significant
GO	Core	GO:0010432	GO:0010432	7	9.4923	13	9907	13568	0.737443	-0.439397	0.109557	0.760281		depleted	not_significant
GO	Core	GO:0015120	GO:0015120	7	5.1112	7	9907	13568	1.36954	0.453688	0.110595	0.760281		enriched	not_significant
GO	Core	GO:0015713	GO:0015713	7	5.1112	7	9907	13568	1.36954	0.453688	0.110595	0.760281		enriched	not_significant
GO	Core	GO:0015717	GO:0015717	7	5.1112	7	9907	13568	1.36954	0.453688	0.110595	0.760281		enriched	not_significant
GO	Core	GO:0030126	GO:0030126	7	9.4923	13	9907	13568	0.737443	-0.439397	0.109557	0.760281		depleted	not_significant
GO	Core	GO:0030335	GO:0030335	7	9.4923	13	9907	13568	0.737443	-0.439397	0.109557	0.760281		depleted	not_significant
GO	Core	GO:0030663	GO:0030663	7	9.4923	13	9907	13568	0.737443	-0.439397	0.109557	0.760281		depleted	not_significant
GO	Core	GO:0031519	GO:0031519	7	9.4923	13	9907	13568	0.737443	-0.439397	0.109557	0.760281		depleted	not_significant
GO	Core	GO:0032296	GO:0032296	7	9.4923	13	9907	13568	0.737443	-0.439397	0.109557	0.760281		depleted	not_significant
GO	Core	GO:0032511	GO:0032511	7	9.4923	13	9907	13568	0.737443	-0.439397	0.109557	0.760281		depleted	not_significant
GO	Core	GO:0033095	GO:0033095	7	5.1112	7	9907	13568	1.36954	0.453688	0.110595	0.760281		enriched	not_significant
GO	Core	GO:0033240	GO:0033240	7	5.1112	7	9907	13568	1.36954	0.453688	0.110595	0.760281		enriched	not_significant
GO	Core	GO:0034432	GO:0034432	7	5.1112	7	9907	13568	1.36954	0.453688	0.110595	0.760281		enriched	not_significant
GO	Core	GO:0035436	GO:0035436	7	5.1112	7	9907	13568	1.36954	0.453688	0.110595	0.760281		enriched	not_significant
GO	Core	GO:0043299	GO:0043299	7	9.4923	13	9907	13568	0.737443	-0.439397	0.109557	0.760281		depleted	not_significant
GO	Core	GO:0043312	GO:0043312	7	9.4923	13	9907	13568	0.737443	-0.439397	0.109557	0.760281		depleted	not_significant
GO	Core	GO:0043457	GO:0043457	7	5.1112	7	9907	13568	1.36954	0.453688	0.110595	0.760281		enriched	not_significant
GO	Core	GO:0044088	GO:0044088	7	5.1112	7	9907	13568	1.36954	0.453688	0.110595	0.760281		enriched	not_significant
GO	Core	GO:0045764	GO:0045764	7	5.1112	7	9907	13568	1.36954	0.453688	0.110595	0.760281		enriched	not_significant
GO	Core	GO:0045990	GO:0045990	7	5.1112	7	9907	13568	1.36954	0.453688	0.110595	0.760281		enriched	not_significant
GO	Core	GO:0046624	GO:0046624	7	5.1112	7	9907	13568	1.36954	0.453688	0.110595	0.760281		enriched	not_significant
GO	Core	GO:0048565	GO:0048565	7	9.4923	13	9907	13568	0.737443	-0.439397	0.109557	0.760281		depleted	not_significant
GO	Core	GO:0051014	GO:0051014	7	5.1112	7	9907	13568	1.36954	0.453688	0.110595	0.760281		enriched	not_significant
GO	Core	GO:0051084	GO:0051084	7	9.4923	13	9907	13568	0.737443	-0.439397	0.109557	0.760281		depleted	not_significant
GO	Core	GO:0051785	GO:0051785	7	5.1112	7	9907	13568	1.36954	0.453688	0.110595	0.760281		enriched	not_significant
GO	Core	GO:0055123	GO:0055123	7	9.4923	13	9907	13568	0.737443	-0.439397	0.109557	0.760281		depleted	not_significant
GO	Core	GO:0060919	GO:0060919	7	5.1112	7	9907	13568	1.36954	0.453688	0.110595	0.760281		enriched	not_significant
GO	Core	GO:0070483	GO:0070483	7	5.1112	7	9907	13568	1.36954	0.453688	0.110595	0.760281		enriched	not_significant
GO	Core	GO:0071479	GO:0071479	7	9.4923	13	9907	13568	0.737443	-0.439397	0.109557	0.760281		depleted	not_significant
GO	Core	GO:0071486	GO:0071486	7	5.1112	7	9907	13568	1.36954	0.453688	0.110595	0.760281		enriched	not_significant
GO	Core	GO:0071917	GO:0071917	7	5.1112	7	9907	13568	1.36954	0.453688	0.110595	0.760281		enriched	not_significant
GO	Core	GO:0090481	GO:0090481	7	9.4923	13	9907	13568	0.737443	-0.439397	0.109557	0.760281		depleted	not_significant
GO	Core	GO:1900377	GO:1900377	7	5.1112	7	9907	13568	1.36954	0.453688	0.110595	0.760281		enriched	not_significant
GO	Core	GO:1902446	GO:1902446	7	5.1112	7	9907	13568	1.36954	0.453688	0.110595	0.760281		enriched	not_significant
GO	Core	GO:1903085	GO:1903085	7	5.1112	7	9907	13568	1.36954	0.453688	0.110595	0.760281		enriched	not_significant
GO	Core	GO:1903086	GO:1903086	7	5.1112	7	9907	13568	1.36954	0.453688	0.110595	0.760281		enriched	not_significant
GO	Core	GO:1990538	GO:1990538	7	5.1112	7	9907	13568	1.36954	0.453688	0.110595	0.760281		enriched	not_significant
GO	Core	GO:2000147	GO:2000147	7	9.4923	13	9907	13568	0.737443	-0.439397	0.109557	0.760281		depleted	not_significant
GO	Core	GO:2000769	GO:2000769	7	5.1112	7	9907	13568	1.36954	0.453688	0.110595	0.760281		enriched	not_significant
GO	Core	GO:1901615	GO:1901615	165	173.781	238	9907	13568	0.949469	-0.074808	0.112114	0.763335		depleted	not_significant
GO	Core	GO:0017076	GO:0017076	150	158.448	217	9907	13568	0.946684	-0.079045	0.111185	0.763335		depleted	not_significant
GO	Core	GO:0032555	GO:0032555	150	158.448	217	9907	13568	0.946684	-0.079045	0.111185	0.763335		depleted	not_significant
GO	Core	GO:0046496	GO:0046496	65	70.8269	97	9907	13568	0.917731	-0.123857	0.112049	0.763335		depleted	not_significant
GO	Core	GO:0009081	GO:0009081	13	16.0638	22	9907	13568	0.809272	-0.305304	0.111367	0.763335		depleted	not_significant
GO	Core	GO:0019432	GO:0019432	13	16.0638	22	9907	13568	0.809272	-0.305304	0.111367	0.763335		depleted	not_significant
GO	Core	GO:0034593	GO:0034593	13	16.0638	22	9907	13568	0.809272	-0.305304	0.111367	0.763335		depleted	not_significant
GO	Core	GO:0090630	GO:0090630	13	16.0638	22	9907	13568	0.809272	-0.305304	0.111367	0.763335		depleted	not_significant
GO	Core	GO:0000178	GO:0000178	9	11.6828	16	9907	13568	0.770364	-0.376387	0.112038	0.763335		depleted	not_significant
GO	Core	GO:0000243	GO:0000243	9	11.6828	16	9907	13568	0.770364	-0.376387	0.112038	0.763335		depleted	not_significant
GO	Core	GO:0005388	GO:0005388	9	11.6828	16	9907	13568	0.770364	-0.376387	0.112038	0.763335		depleted	not_significant
GO	Core	GO:0006505	GO:0006505	9	11.6828	16	9907	13568	0.770364	-0.376387	0.112038	0.763335		depleted	not_significant
GO	Core	GO:0006506	GO:0006506	9	11.6828	16	9907	13568	0.770364	-0.376387	0.112038	0.763335		depleted	not_significant
GO	Core	GO:0008266	GO:0008266	9	11.6828	16	9907	13568	0.770364	-0.376387	0.112038	0.763335		depleted	not_significant
GO	Core	GO:0016646	GO:0016646	9	11.6828	16	9907	13568	0.770364	-0.376387	0.112038	0.763335		depleted	not_significant
GO	Core	GO:0019882	GO:0019882	9	11.6828	16	9907	13568	0.770364	-0.376387	0.112038	0.763335		depleted	not_significant
GO	Core	GO:0030838	GO:0030838	9	11.6828	16	9907	13568	0.770364	-0.376387	0.112038	0.763335		depleted	not_significant
GO	Core	GO:0031306	GO:0031306	9	11.6828	16	9907	13568	0.770364	-0.376387	0.112038	0.763335		depleted	not_significant
GO	Core	GO:0031307	GO:0031307	9	11.6828	16	9907	13568	0.770364	-0.376387	0.112038	0.763335		depleted	not_significant
GO	Core	GO:0034260	GO:0034260	9	11.6828	16	9907	13568	0.770364	-0.376387	0.112038	0.763335		depleted	not_significant
GO	Core	GO:0035327	GO:0035327	9	11.6828	16	9907	13568	0.770364	-0.376387	0.112038	0.763335		depleted	not_significant
GO	Core	GO:0043022	GO:0043022	9	11.6828	16	9907	13568	0.770364	-0.376387	0.112038	0.763335		depleted	not_significant
GO	Core	GO:0044456	GO:0044456	9	11.6828	16	9907	13568	0.770364	-0.376387	0.112038	0.763335		depleted	not_significant
GO	Core	GO:0048002	GO:0048002	9	11.6828	16	9907	13568	0.770364	-0.376387	0.112038	0.763335		depleted	not_significant
GO	Core	GO:0048455	GO:0048455	9	11.6828	16	9907	13568	0.770364	-0.376387	0.112038	0.763335		depleted	not_significant
GO	Core	GO:0048534	GO:0048534	9	11.6828	16	9907	13568	0.770364	-0.376387	0.112038	0.763335		depleted	not_significant
GO	Core	GO:1905354	GO:1905354	9	11.6828	16	9907	13568	0.770364	-0.376387	0.112038	0.763335		depleted	not_significant
GO	Core	GO:0008574	GO:0008574	11	13.8733	19	9907	13568	0.79289	-0.334808	0.11236	0.764098		depleted	not_significant
GO	Core	GO:0035257	GO:0035257	11	13.8733	19	9907	13568	0.79289	-0.334808	0.11236	0.764098		depleted	not_significant
GO	Core	GO:0043140	GO:0043140	11	13.8733	19	9907	13568	0.79289	-0.334808	0.11236	0.764098		depleted	not_significant
GO	Core	GO:0051181	GO:0051181	11	13.8733	19	9907	13568	0.79289	-0.334808	0.11236	0.764098		depleted	not_significant
GO	Core	GO:0051427	GO:0051427	11	13.8733	19	9907	13568	0.79289	-0.334808	0.11236	0.764098		depleted	not_significant
GO	Core	GO:0035670	GO:0035670	44	48.9217	67	9907	13568	0.899397	-0.15297	0.112798	0.764122		depleted	not_significant
GO	Core	GO:0009787	GO:0009787	106	99.3037	136	9907	13568	1.06743	0.094146	0.113011	0.764136		enriched	not_significant
GO	Core	GO:1901419	GO:1901419	106	99.3037	136	9907	13568	1.06743	0.094146	0.113011	0.764136		enriched	not_significant
GO	Core	GO:1905957	GO:1905957	106	99.3037	136	9907	13568	1.06743	0.094146	0.113011	0.764136		enriched	not_significant
GO	Core	GO:0010562	GO:0010562	58	63.5251	87	9907	13568	0.913024	-0.131275	0.113072	0.764185		depleted	not_significant
GO	Core	GO:0045937	GO:0045937	58	63.5251	87	9907	13568	0.913024	-0.131275	0.113072	0.764185		depleted	not_significant
GO	Core	GO:0007154	GO:0007154	1015	1034.66	1417	9907	13568	0.981002	-0.027672	0.113179	0.764727		depleted	not_significant
GO	Core	GO:0006486	GO:0006486	51	56.2234	77	9907	13568	0.907096	-0.140673	0.113423	0.765827		depleted	not_significant
GO	Core	GO:0043413	GO:0043413	51	56.2234	77	9907	13568	0.907096	-0.140673	0.113423	0.765827		depleted	not_significant
GO	Core	GO:0035639	GO:0035639	133	140.924	193	9907	13568	0.943774	-0.083487	0.113623	0.766992		depleted	not_significant
GO	Core	GO:0010029	GO:0010029	72	66.4458	91	9907	13568	1.08359	0.115818	0.113715	0.767432		enriched	not_significant
GO	Core	GO:0005741	GO:0005741	26	29.9371	41	9907	13568	0.868487	-0.203424	0.114739	0.773426		depleted	not_significant
GO	Core	GO:0044264	GO:0044264	148	156.257	214	9907	13568	0.947156	-0.078326	0.115147	0.774733		depleted	not_significant
GO	Core	GO:0006096	GO:0006096	35	39.4294	54	9907	13568	0.887663	-0.171917	0.115314	0.774733		depleted	not_significant
GO	Core	GO:0006757	GO:0006757	35	39.4294	54	9907	13568	0.887663	-0.171917	0.115314	0.774733		depleted	not_significant
GO	Core	GO:0046031	GO:0046031	35	39.4294	54	9907	13568	0.887663	-0.171917	0.115314	0.774733		depleted	not_significant
GO	Core	GO:0030154	GO:0030154	595	580.488	795	9907	13568	1.025	0.035623	0.123869	0.776528		enriched	not_significant
GO	Core	GO:0042546	GO:0042546	144	136.542	187	9907	13568	1.05462	0.076718	0.123242	0.776528		enriched	not_significant
GO	Core	GO:0044092	GO:0044092	123	116.098	159	9907	13568	1.05945	0.083319	0.1239	0.776528		enriched	not_significant
GO	Core	GO:0045595	GO:0045595	119	126.32	173	9907	13568	0.942051	-0.086123	0.120711	0.776528		depleted	not_significant
GO	Core	GO:0010073	GO:0010073	112	119.018	163	9907	13568	0.941031	-0.087685	0.124383	0.776528		depleted	not_significant
GO	Core	GO:0000377	GO:0000377	109	116.098	159	9907	13568	0.938865	-0.091011	0.118793	0.776528		depleted	not_significant
GO	Core	GO:0071478	GO:0071478	102	95.6528	131	9907	13568	1.06636	0.09269	0.122527	0.776528		enriched	not_significant
GO	Core	GO:0009965	GO:0009965	93	86.8907	119	9907	13568	1.07031	0.098029	0.12098	0.776528		enriched	not_significant
GO	Core	GO:0044389	GO:0044389	85	91.2717	125	9907	13568	0.931285	-0.102705	0.122261	0.776528		depleted	not_significant
GO	Core	GO:0052689	GO:0052689	84	78.1286	107	9907	13568	1.07515	0.104538	0.118611	0.776528		enriched	not_significant
GO	Core	GO:0071395	GO:0071395	81	75.2079	103	9907	13568	1.07701	0.107037	0.117597	0.776528		enriched	not_significant
GO	Core	GO:0004857	GO:0004857	78	72.2872	99	9907	13568	1.07903	0.109734	0.116453	0.776528		enriched	not_significant
GO	Core	GO:0016054	GO:0016054	78	83.97	115	9907	13568	0.928903	-0.1064	0.125135	0.776528		depleted	not_significant
GO	Core	GO:0046395	GO:0046395	78	83.97	115	9907	13568	0.928903	-0.1064	0.125135	0.776528		depleted	not_significant
GO	Core	GO:0007034	GO:0007034	59	64.2553	88	9907	13568	0.918212	-0.123101	0.126895	0.776528		depleted	not_significant
GO	Core	GO:0004721	GO:0004721	49	44.5406	61	9907	13568	1.10012	0.13766	0.124394	0.776528		enriched	not_significant
GO	Core	GO:1901000	GO:1901000	49	44.5406	61	9907	13568	1.10012	0.13766	0.124394	0.776528		enriched	not_significant
GO	Core	GO:0005764	GO:0005764	47	51.8423	71	9907	13568	0.906595	-0.14147	0.123359	0.776528		depleted	not_significant
GO	Core	GO:0003333	GO:0003333	46	41.6199	57	9907	13568	1.10524	0.14436	0.120952	0.776528		enriched	not_significant
GO	Core	GO:0006865	GO:0006865	46	41.6199	57	9907	13568	1.10524	0.14436	0.120952	0.776528		enriched	not_significant
GO	Core	GO:0000502	GO:0000502	42	46.7311	64	9907	13568	0.898758	-0.153995	0.117592	0.776528		depleted	not_significant
GO	Core	GO:0046488	GO:0046488	42	46.7311	64	9907	13568	0.898758	-0.153995	0.117592	0.776528		depleted	not_significant
GO	Core	GO:1905369	GO:1905369	42	46.7311	64	9907	13568	0.898758	-0.153995	0.117592	0.776528		depleted	not_significant
GO	Core	GO:0000149	GO:0000149	33	37.2389	51	9907	13568	0.886171	-0.174343	0.120113	0.776528		depleted	not_significant
GO	Core	GO:0004364	GO:0004364	33	29.207	40	9907	13568	1.12987	0.176154	0.117352	0.776528		enriched	not_significant
GO	Core	GO:0009062	GO:0009062	33	37.2389	51	9907	13568	0.886171	-0.174343	0.120113	0.776528		depleted	not_significant
GO	Core	GO:1905421	GO:1905421	33	29.207	40	9907	13568	1.12987	0.176154	0.117352	0.776528		enriched	not_significant
GO	Core	GO:0030148	GO:0030148	26	22.6354	31	9907	13568	1.14864	0.199931	0.119996	0.776528		enriched	not_significant
GO	Core	GO:0006418	GO:0006418	24	27.7466	38	9907	13568	0.864971	-0.209277	0.119053	0.776528		depleted	not_significant
GO	Core	GO:0010208	GO:0010208	24	27.7466	38	9907	13568	0.864971	-0.209277	0.119053	0.776528		depleted	not_significant
GO	Core	GO:0085029	GO:0085029	24	27.7466	38	9907	13568	0.864971	-0.209277	0.119053	0.776528		depleted	not_significant
GO	Core	GO:1905037	GO:1905037	24	27.7466	38	9907	13568	0.864971	-0.209277	0.119053	0.776528		depleted	not_significant
GO	Core	GO:0006305	GO:0006305	22	25.5561	35	9907	13568	0.860852	-0.216163	0.12346	0.776528		depleted	not_significant
GO	Core	GO:0006306	GO:0006306	22	25.5561	35	9907	13568	0.860852	-0.216163	0.12346	0.776528		depleted	not_significant
GO	Core	GO:0006641	GO:0006641	22	25.5561	35	9907	13568	0.860852	-0.216163	0.12346	0.776528		depleted	not_significant
GO	Core	GO:0017053	GO:0017053	22	25.5561	35	9907	13568	0.860852	-0.216163	0.12346	0.776528		depleted	not_significant
GO	Core	GO:0031330	GO:0031330	22	25.5561	35	9907	13568	0.860852	-0.216163	0.12346	0.776528		depleted	not_significant
GO	Core	GO:2000278	GO:2000278	22	25.5561	35	9907	13568	0.860852	-0.216163	0.12346	0.776528		depleted	not_significant
GO	Core	GO:0001046	GO:0001046	19	16.0638	22	9907	13568	1.18278	0.242184	0.116938	0.776528		enriched	not_significant
GO	Core	GO:0002791	GO:0002791	19	16.0638	22	9907	13568	1.18278	0.242184	0.116938	0.776528		enriched	not_significant
GO	Core	GO:0016854	GO:0016854	19	16.0638	22	9907	13568	1.18278	0.242184	0.116938	0.776528		enriched	not_significant
GO	Core	GO:0042285	GO:0042285	19	16.0638	22	9907	13568	1.18278	0.242184	0.116938	0.776528		enriched	not_significant
GO	Core	GO:0050708	GO:0050708	19	16.0638	22	9907	13568	1.18278	0.242184	0.116938	0.776528		enriched	not_significant
GO	Core	GO:0005744	GO:0005744	15	12.413	17	9907	13568	1.20842	0.273116	0.123091	0.776528		enriched	not_significant
GO	Core	GO:0009625	GO:0009625	15	12.413	17	9907	13568	1.20842	0.273116	0.123091	0.776528		enriched	not_significant
GO	Core	GO:0031057	GO:0031057	15	12.413	17	9907	13568	1.20842	0.273116	0.123091	0.776528		enriched	not_significant
GO	Core	GO:1901371	GO:1901371	15	12.413	17	9907	13568	1.20842	0.273116	0.123091	0.776528		enriched	not_significant
GO	Core	GO:2001057	GO:2001057	15	12.413	17	9907	13568	1.20842	0.273116	0.123091	0.776528		enriched	not_significant
GO	Core	GO:0003916	GO:0003916	11	8.7621	12	9907	13568	1.25541	0.328157	0.124705	0.776528		enriched	not_significant
GO	Core	GO:0004332	GO:0004332	11	8.7621	12	9907	13568	1.25541	0.328157	0.124705	0.776528		enriched	not_significant
GO	Core	GO:0005347	GO:0005347	11	8.7621	12	9907	13568	1.25541	0.328157	0.124705	0.776528		enriched	not_significant
GO	Core	GO:0005845	GO:0005845	11	8.7621	12	9907	13568	1.25541	0.328157	0.124705	0.776528		enriched	not_significant
GO	Core	GO:0006949	GO:0006949	11	8.7621	12	9907	13568	1.25541	0.328157	0.124705	0.776528		enriched	not_significant
GO	Core	GO:0009831	GO:0009831	11	8.7621	12	9907	13568	1.25541	0.328157	0.124705	0.776528		enriched	not_significant
GO	Core	GO:0015217	GO:0015217	11	8.7621	12	9907	13568	1.25541	0.328157	0.124705	0.776528		enriched	not_significant
GO	Core	GO:0016234	GO:0016234	11	8.7621	12	9907	13568	1.25541	0.328157	0.124705	0.776528		enriched	not_significant
GO	Core	GO:0016857	GO:0016857	11	8.7621	12	9907	13568	1.25541	0.328157	0.124705	0.776528		enriched	not_significant
GO	Core	GO:0032544	GO:0032544	11	8.7621	12	9907	13568	1.25541	0.328157	0.124705	0.776528		enriched	not_significant
GO	Core	GO:0035082	GO:0035082	11	8.7621	12	9907	13568	1.25541	0.328157	0.124705	0.776528		enriched	not_significant
GO	Core	GO:0052031	GO:0052031	11	8.7621	12	9907	13568	1.25541	0.328157	0.124705	0.776528		enriched	not_significant
GO	Core	GO:0052173	GO:0052173	11	8.7621	12	9907	13568	1.25541	0.328157	0.124705	0.776528		enriched	not_significant
GO	Core	GO:0052200	GO:0052200	11	8.7621	12	9907	13568	1.25541	0.328157	0.124705	0.776528		enriched	not_significant
GO	Core	GO:0052255	GO:0052255	11	8.7621	12	9907	13568	1.25541	0.328157	0.124705	0.776528		enriched	not_significant
GO	Core	GO:0052552	GO:0052552	11	8.7621	12	9907	13568	1.25541	0.328157	0.124705	0.776528		enriched	not_significant
GO	Core	GO:0052553	GO:0052553	11	8.7621	12	9907	13568	1.25541	0.328157	0.124705	0.776528		enriched	not_significant
GO	Core	GO:0052564	GO:0052564	11	8.7621	12	9907	13568	1.25541	0.328157	0.124705	0.776528		enriched	not_significant
GO	Core	GO:0052572	GO:0052572	11	8.7621	12	9907	13568	1.25541	0.328157	0.124705	0.776528		enriched	not_significant
GO	Core	GO:0061085	GO:0061085	11	8.7621	12	9907	13568	1.25541	0.328157	0.124705	0.776528		enriched	not_significant
GO	Core	GO:0071007	GO:0071007	11	8.7621	12	9907	13568	1.25541	0.328157	0.124705	0.776528		enriched	not_significant
GO	Core	GO:0075136	GO:0075136	11	8.7621	12	9907	13568	1.25541	0.328157	0.124705	0.776528		enriched	not_significant
GO	Core	GO:0090506	GO:0090506	11	8.7621	12	9907	13568	1.25541	0.328157	0.124705	0.776528		enriched	not_significant
GO	Core	GO:0000350	GO:0000350	2	3.6509	5	9907	13568	0.547815	-0.86824	0.125481	0.776528		depleted	not_significant
GO	Core	GO:0000439	GO:0000439	2	3.6509	5	9907	13568	0.547815	-0.86824	0.125481	0.776528		depleted	not_significant
GO	Core	GO:0003825	GO:0003825	2	3.6509	5	9907	13568	0.547815	-0.86824	0.125481	0.776528		depleted	not_significant
GO	Core	GO:0004529	GO:0004529	2	3.6509	5	9907	13568	0.547815	-0.86824	0.125481	0.776528		depleted	not_significant
GO	Core	GO:0004719	GO:0004719	2	3.6509	5	9907	13568	0.547815	-0.86824	0.125481	0.776528		depleted	not_significant
GO	Core	GO:0005766	GO:0005766	2	3.6509	5	9907	13568	0.547815	-0.86824	0.125481	0.776528		depleted	not_significant
GO	Core	GO:0005912	GO:0005912	2	3.6509	5	9907	13568	0.547815	-0.86824	0.125481	0.776528		depleted	not_significant
GO	Core	GO:0006152	GO:0006152	2	3.6509	5	9907	13568	0.547815	-0.86824	0.125481	0.776528		depleted	not_significant
GO	Core	GO:0006388	GO:0006388	2	3.6509	5	9907	13568	0.547815	-0.86824	0.125481	0.776528		depleted	not_significant
GO	Core	GO:0006501	GO:0006501	2	3.6509	5	9907	13568	0.547815	-0.86824	0.125481	0.776528		depleted	not_significant
GO	Core	GO:0006541	GO:0006541	2	3.6509	5	9907	13568	0.547815	-0.86824	0.125481	0.776528		depleted	not_significant
GO	Core	GO:0006636	GO:0006636	2	3.6509	5	9907	13568	0.547815	-0.86824	0.125481	0.776528		depleted	not_significant
GO	Core	GO:0006792	GO:0006792	2	3.6509	5	9907	13568	0.547815	-0.86824	0.125481	0.776528		depleted	not_significant
GO	Core	GO:0007076	GO:0007076	2	3.6509	5	9907	13568	0.547815	-0.86824	0.125481	0.776528		depleted	not_significant
GO	Core	GO:0008199	GO:0008199	2	3.6509	5	9907	13568	0.547815	-0.86824	0.125481	0.776528		depleted	not_significant
GO	Core	GO:0008406	GO:0008406	2	3.6509	5	9907	13568	0.547815	-0.86824	0.125481	0.776528		depleted	not_significant
GO	Core	GO:0010069	GO:0010069	2	3.6509	5	9907	13568	0.547815	-0.86824	0.125481	0.776528		depleted	not_significant
GO	Core	GO:0010111	GO:0010111	2	3.6509	5	9907	13568	0.547815	-0.86824	0.125481	0.776528		depleted	not_significant
GO	Core	GO:0010236	GO:0010236	2	3.6509	5	9907	13568	0.547815	-0.86824	0.125481	0.776528		depleted	not_significant
GO	Core	GO:0010313	GO:0010313	2	3.6509	5	9907	13568	0.547815	-0.86824	0.125481	0.776528		depleted	not_significant
GO	Core	GO:0010521	GO:0010521	2	3.6509	5	9907	13568	0.547815	-0.86824	0.125481	0.776528		depleted	not_significant
GO	Core	GO:0015690	GO:0015690	2	3.6509	5	9907	13568	0.547815	-0.86824	0.125481	0.776528		depleted	not_significant
GO	Core	GO:0016255	GO:0016255	2	3.6509	5	9907	13568	0.547815	-0.86824	0.125481	0.776528		depleted	not_significant
GO	Core	GO:0016598	GO:0016598	2	3.6509	5	9907	13568	0.547815	-0.86824	0.125481	0.776528		depleted	not_significant
GO	Core	GO:0016653	GO:0016653	2	3.6509	5	9907	13568	0.547815	-0.86824	0.125481	0.776528		depleted	not_significant
GO	Core	GO:0016895	GO:0016895	2	3.6509	5	9907	13568	0.547815	-0.86824	0.125481	0.776528		depleted	not_significant
GO	Core	GO:0017096	GO:0017096	2	3.6509	5	9907	13568	0.547815	-0.86824	0.125481	0.776528		depleted	not_significant
GO	Core	GO:0018126	GO:0018126	2	3.6509	5	9907	13568	0.547815	-0.86824	0.125481	0.776528		depleted	not_significant
GO	Core	GO:0019511	GO:0019511	2	3.6509	5	9907	13568	0.547815	-0.86824	0.125481	0.776528		depleted	not_significant
GO	Core	GO:0019798	GO:0019798	2	3.6509	5	9907	13568	0.547815	-0.86824	0.125481	0.776528		depleted	not_significant
GO	Core	GO:0030331	GO:0030331	2	3.6509	5	9907	13568	0.547815	-0.86824	0.125481	0.776528		depleted	not_significant
GO	Core	GO:0030744	GO:0030744	2	3.6509	5	9907	13568	0.547815	-0.86824	0.125481	0.776528		depleted	not_significant
GO	Core	GO:0031156	GO:0031156	2	3.6509	5	9907	13568	0.547815	-0.86824	0.125481	0.776528		depleted	not_significant
GO	Core	GO:0031543	GO:0031543	2	3.6509	5	9907	13568	0.547815	-0.86824	0.125481	0.776528		depleted	not_significant
GO	Core	GO:0031897	GO:0031897	2	3.6509	5	9907	13568	0.547815	-0.86824	0.125481	0.776528		depleted	not_significant
GO	Core	GO:0032183	GO:0032183	2	3.6509	5	9907	13568	0.547815	-0.86824	0.125481	0.776528		depleted	not_significant
GO	Core	GO:0032648	GO:0032648	2	3.6509	5	9907	13568	0.547815	-0.86824	0.125481	0.776528		depleted	not_significant
GO	Core	GO:0032728	GO:0032728	2	3.6509	5	9907	13568	0.547815	-0.86824	0.125481	0.776528		depleted	not_significant
GO	Core	GO:0033185	GO:0033185	2	3.6509	5	9907	13568	0.547815	-0.86824	0.125481	0.776528		depleted	not_significant
GO	Core	GO:0034067	GO:0034067	2	3.6509	5	9907	13568	0.547815	-0.86824	0.125481	0.776528		depleted	not_significant
GO	Core	GO:0035148	GO:0035148	2	3.6509	5	9907	13568	0.547815	-0.86824	0.125481	0.776528		depleted	not_significant
GO	Core	GO:0036092	GO:0036092	2	3.6509	5	9907	13568	0.547815	-0.86824	0.125481	0.776528		depleted	not_significant
GO	Core	GO:0042582	GO:0042582	2	3.6509	5	9907	13568	0.547815	-0.86824	0.125481	0.776528		depleted	not_significant
GO	Core	GO:0042771	GO:0042771	2	3.6509	5	9907	13568	0.547815	-0.86824	0.125481	0.776528		depleted	not_significant
GO	Core	GO:0043235	GO:0043235	2	3.6509	5	9907	13568	0.547815	-0.86824	0.125481	0.776528		depleted	not_significant
GO	Core	GO:0043327	GO:0043327	2	3.6509	5	9907	13568	0.547815	-0.86824	0.125481	0.776528		depleted	not_significant
GO	Core	GO:0043523	GO:0043523	2	3.6509	5	9907	13568	0.547815	-0.86824	0.125481	0.776528		depleted	not_significant
GO	Core	GO:0043614	GO:0043614	2	3.6509	5	9907	13568	0.547815	-0.86824	0.125481	0.776528		depleted	not_significant
GO	Core	GO:0043937	GO:0043937	2	3.6509	5	9907	13568	0.547815	-0.86824	0.125481	0.776528		depleted	not_significant
GO	Core	GO:0045137	GO:0045137	2	3.6509	5	9907	13568	0.547815	-0.86824	0.125481	0.776528		depleted	not_significant
GO	Core	GO:0046425	GO:0046425	2	3.6509	5	9907	13568	0.547815	-0.86824	0.125481	0.776528		depleted	not_significant
GO	Core	GO:0046456	GO:0046456	2	3.6509	5	9907	13568	0.547815	-0.86824	0.125481	0.776528		depleted	not_significant
GO	Core	GO:0047763	GO:0047763	2	3.6509	5	9907	13568	0.547815	-0.86824	0.125481	0.776528		depleted	not_significant
GO	Core	GO:0048168	GO:0048168	2	3.6509	5	9907	13568	0.547815	-0.86824	0.125481	0.776528		depleted	not_significant
GO	Core	GO:0048256	GO:0048256	2	3.6509	5	9907	13568	0.547815	-0.86824	0.125481	0.776528		depleted	not_significant
GO	Core	GO:0050678	GO:0050678	2	3.6509	5	9907	13568	0.547815	-0.86824	0.125481	0.776528		depleted	not_significant
GO	Core	GO:0050680	GO:0050680	2	3.6509	5	9907	13568	0.547815	-0.86824	0.125481	0.776528		depleted	not_significant
GO	Core	GO:0050687	GO:0050687	2	3.6509	5	9907	13568	0.547815	-0.86824	0.125481	0.776528		depleted	not_significant
GO	Core	GO:0050730	GO:0050730	2	3.6509	5	9907	13568	0.547815	-0.86824	0.125481	0.776528		depleted	not_significant
GO	Core	GO:0050851	GO:0050851	2	3.6509	5	9907	13568	0.547815	-0.86824	0.125481	0.776528		depleted	not_significant
GO	Core	GO:0050852	GO:0050852	2	3.6509	5	9907	13568	0.547815	-0.86824	0.125481	0.776528		depleted	not_significant
GO	Core	GO:0051974	GO:0051974	2	3.6509	5	9907	13568	0.547815	-0.86824	0.125481	0.776528		depleted	not_significant
GO	Core	GO:0055087	GO:0055087	2	3.6509	5	9907	13568	0.547815	-0.86824	0.125481	0.776528		depleted	not_significant
GO	Core	GO:0061687	GO:0061687	2	3.6509	5	9907	13568	0.547815	-0.86824	0.125481	0.776528		depleted	not_significant
GO	Core	GO:0070122	GO:0070122	2	3.6509	5	9907	13568	0.547815	-0.86824	0.125481	0.776528		depleted	not_significant
GO	Core	GO:0070138	GO:0070138	2	3.6509	5	9907	13568	0.547815	-0.86824	0.125481	0.776528		depleted	not_significant
GO	Core	GO:0070140	GO:0070140	2	3.6509	5	9907	13568	0.547815	-0.86824	0.125481	0.776528		depleted	not_significant
GO	Core	GO:0070161	GO:0070161	2	3.6509	5	9907	13568	0.547815	-0.86824	0.125481	0.776528		depleted	not_significant
GO	Core	GO:0070372	GO:0070372	2	3.6509	5	9907	13568	0.547815	-0.86824	0.125481	0.776528		depleted	not_significant
GO	Core	GO:0070816	GO:0070816	2	3.6509	5	9907	13568	0.547815	-0.86824	0.125481	0.776528		depleted	not_significant
GO	Core	GO:0070989	GO:0070989	2	3.6509	5	9907	13568	0.547815	-0.86824	0.125481	0.776528		depleted	not_significant
GO	Core	GO:0071030	GO:0071030	2	3.6509	5	9907	13568	0.547815	-0.86824	0.125481	0.776528		depleted	not_significant
GO	Core	GO:0071048	GO:0071048	2	3.6509	5	9907	13568	0.547815	-0.86824	0.125481	0.776528		depleted	not_significant
GO	Core	GO:0072089	GO:0072089	2	3.6509	5	9907	13568	0.547815	-0.86824	0.125481	0.776528		depleted	not_significant
GO	Core	GO:0072512	GO:0072512	2	3.6509	5	9907	13568	0.547815	-0.86824	0.125481	0.776528		depleted	not_significant
GO	Core	GO:0080151	GO:0080151	2	3.6509	5	9907	13568	0.547815	-0.86824	0.125481	0.776528		depleted	not_significant
GO	Core	GO:0090227	GO:0090227	2	3.6509	5	9907	13568	0.547815	-0.86824	0.125481	0.776528		depleted	not_significant
GO	Core	GO:0090308	GO:0090308	2	3.6509	5	9907	13568	0.547815	-0.86824	0.125481	0.776528		depleted	not_significant
GO	Core	GO:0097428	GO:0097428	2	3.6509	5	9907	13568	0.547815	-0.86824	0.125481	0.776528		depleted	not_significant
GO	Core	GO:1902105	GO:1902105	2	3.6509	5	9907	13568	0.547815	-0.86824	0.125481	0.776528		depleted	not_significant
GO	Core	GO:1904892	GO:1904892	2	3.6509	5	9907	13568	0.547815	-0.86824	0.125481	0.776528		depleted	not_significant
GO	Core	GO:0044249	GO:0044249	1439	1460.35	2000	9907	13568	0.985382	-0.021245	0.127856	0.780188		depleted	not_significant
GO	Core	GO:0009135	GO:0009135	38	42.3501	58	9907	13568	0.897283	-0.156366	0.127931	0.780188		depleted	not_significant
GO	Core	GO:0009179	GO:0009179	38	42.3501	58	9907	13568	0.897283	-0.156366	0.127931	0.780188		depleted	not_significant
GO	Core	GO:0009185	GO:0009185	38	42.3501	58	9907	13568	0.897283	-0.156366	0.127931	0.780188		depleted	not_significant
GO	Core	GO:0050767	GO:0050767	20	23.3656	32	9907	13568	0.85596	-0.224384	0.127928	0.780188		depleted	not_significant
GO	Core	GO:0055075	GO:0055075	20	23.3656	32	9907	13568	0.85596	-0.224384	0.127928	0.780188		depleted	not_significant
GO	Core	GO:0140053	GO:0140053	20	23.3656	32	9907	13568	0.85596	-0.224384	0.127928	0.780188		depleted	not_significant
GO	Core	GO:0009145	GO:0009145	52	56.9536	78	9907	13568	0.913024	-0.131275	0.128228	0.781494		depleted	not_significant
GO	Core	GO:0009206	GO:0009206	52	56.9536	78	9907	13568	0.913024	-0.131275	0.128228	0.781494		depleted	not_significant
GO	Core	GO:0016591	GO:0016591	52	56.9536	78	9907	13568	0.913024	-0.131275	0.128228	0.781494		depleted	not_significant
GO	Core	GO:0016835	GO:0016835	45	49.6518	68	9907	13568	0.906311	-0.141922	0.12872	0.783651		depleted	not_significant
GO	Core	GO:0072525	GO:0072525	45	49.6518	68	9907	13568	0.906311	-0.141922	0.12872	0.783651		depleted	not_significant
[truncated: 26,420 more rows]

[truncated: 14 more sheets: S9B-COG_enrichment, S9C-KEGG_enrichment, S9D-Top_terms_summary, S10A-Rgenes_per_accession, S10B-Rgenes_per_group, S10C-Rgenes_panclass, S10D-Rgenes_catalog, S11A-Enrichment_residuals, S11B-Rclass_pan_counts, S11C-Contigency_matrix, S12A-Stability_profiles, S12B-Component_counts, S12C-Gene_catalog, S12D-Domain_summary]
